# Supplementary material for: Syntheses of Dinor-cis/iso-12-oxo-phytodienoic acid (dn-cis/iso-OPDAs), Ancestral Jasmonate Phytohormones of the Bryophyte Marchantia Polymorpha L., and their Catabolites
Source: Research Square preprint supplement (doi:10.21203/rs.3.rs-128050/v1), 2020-12-18
Supplement: Supplementary file 1 [file 49cfc3ddee6c2cb0732e531e.pdf]

**Syntheses of dinor-*cis/iso*-12-oxo-phytodienoic acid (dn-*cis/iso*-OPDAs), ancestral jasmonate phytohormones of the bryophyte *Marchantia polymorpha* L., and their catabolites**

Jianxin Wang <sup>1,3</sup>, Haruka Sakurai <sup>1,3</sup>, Nobuki Kato\* <sup>1</sup>, Takuya Kaji <sup>1</sup>, and Minoru Ueda,\*<sup>1,2</sup>

<sup>1</sup> *Department of Chemistry Tohoku University 6-3 Aramaki-Aza Aoba, Aoba-ku, Sendai 980-8578, Japan*

<sup>2</sup> *Department of Molecular and Chemical Life Sciences, Graduate School of Life Sciences, Tohoku University, Sendai 980-8578, Japan*

<sup>3</sup> *These authors contributed equally to this work.*

Supporting Information

52 pages

Contents:

|          |                                     |
|----------|-------------------------------------|
| S2:      | Supplementary Text and Figures      |
| S3-S12:  | Experimental Section                |
| S9:      | Supplementary References            |
| S10-S29: | 400 MHz <sup>1</sup> H NMR spectra  |
| S30-S49: | 100 MHz <sup>13</sup> C NMR spectra |

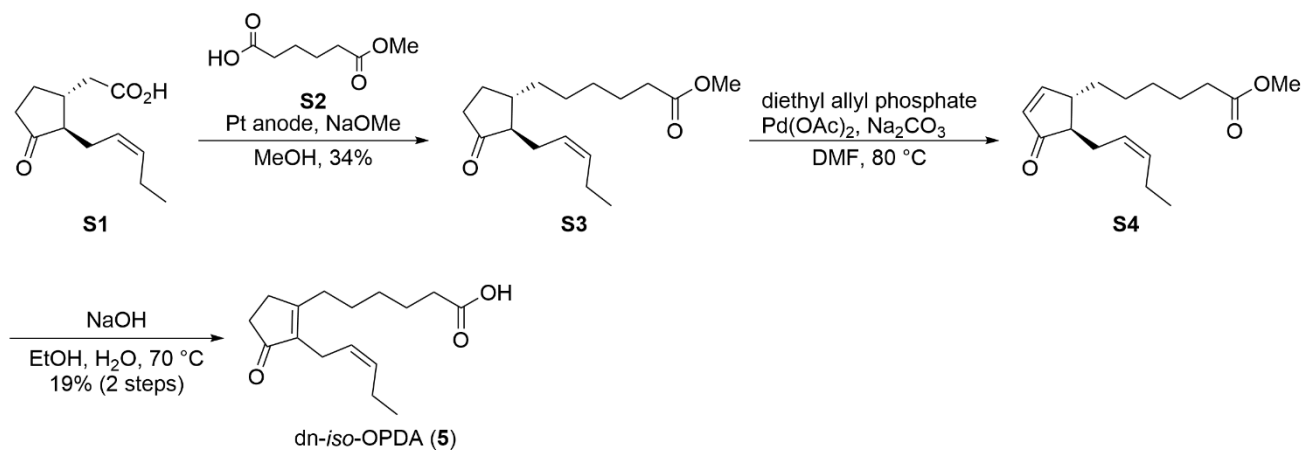

**Scheme S1.** Synthesis of dn-iso-OPDA (5) by Solano *et al.*

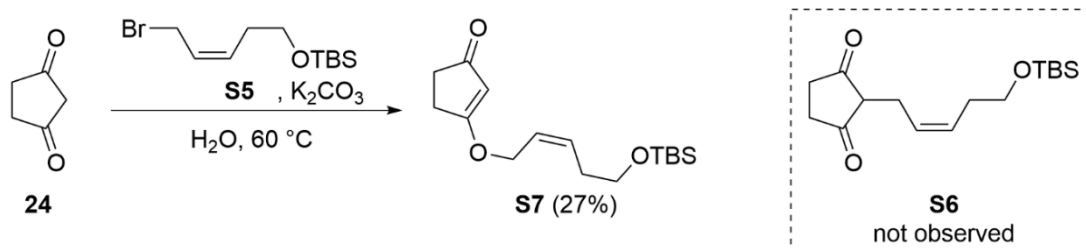

**Scheme S2.** Unsuccessful side chain introduction by allylation.

## Experimental Section

### General

All chemical reagents and solvents were obtained from commercial suppliers (Kanto Chemical Co. Ltd., Wako Pure Chemical Industries Co. Ltd., Nacalai Tesque Co. Ltd., Tokyo Chemical Industry Co. Ltd., Sigma-Aldrich Co. LLC., GE Healthcare) and used without further purification. All anhydrous solvents were either dried by standard techniques and freshly distilled before use, or purchased in anhydrous form and used as supplied. Reversed-phase high-performance liquid chromatography (HPLC) was carried out on a PU-4180 plus pump equipped with UV-4075 and MD-4010 detectors (JASCO, Tokyo, Japan).  $^1\text{H}$  and  $^{13}\text{C}$  NMR spectra were recorded on a JNM-ECS-400 spectrometer (JEOL, Tokyo, Japan) in deuterated chloroform using TMS as an internal standard. Fourier transform infrared (FT/IR) spectra were recorded on an FT/IR-4100 (JASCO, Tokyo, Japan). High-resolution (HR) electrospray ionization (ESI)-mass spectrometry (MS) analyses were conducted using a microTOF II (Bruker Daltonics Inc., Billerica, MA). Optical rotations were measured using a JASCO P-2200 polarimeter (JASCO, Tokyo, Japan). Flash chromatography was performed on an Isolera system (Biotage Ltd., North Carolina, US). TLC analyses were performed on Silica gel F254 (0.25 mm or 0.5 mm, MERCK, Germany) or RP-18F254S (0.25 mm, MERCK). All reactions were carried out under air unless stated otherwise.

**Synthesis of dimethylamide (17).** To a suspension of CuCN (65.5 mg, 731  $\mu\text{mol}$ ) in THF (14 mL) was added TBDPSO(CH<sub>2</sub>)<sub>6</sub>MgBr (27 mL, 0.52 M in THF, 14.1 mmol) at -30 °C under an argon atmosphere. The reaction mixture was stirred at -30 °C for 20 min, and a solution of **15** (670 mg, 4.72 mmol) in THF (7 mL) was added. After being stirred at -18 °C for 11 h, the reaction mixture was quenched with saturated aqueous NH<sub>4</sub>Cl, and then extracted with EtOAc/*n*-hexane (2/8). The resulting organic layer was washed with saturated aqueous NaCl, dried over Na<sub>2</sub>SO<sub>4</sub>, and filtered. After evaporation, the residue was purified by medium-pressure chromatography (Isolera, eluent: 95:5 *n*-hexane/EtOAc to 60:40 *n*-hexane/EtOAc) to give a colorless oil (2.67 g, **16** and by-products). To a solution of the mixture (2.67 g), PPh<sub>3</sub> (2.48 g, 9.44 mmol) and AcOH (550  $\mu\text{L}$ , 96.1 mmol) in THF (16 mL) was added DIAD (1.9 M in toluene, 5.3 mL, 10.1 mmol) at -78 °C under an argon atmosphere. The mixture was stirred at 0 °C for 1 h and the reaction was quenched with saturated aqueous NH<sub>4</sub>Cl. The mixture was extracted with *n*-hexane. The combined organic layers were dried over Na<sub>2</sub>SO<sub>4</sub> and concentrated under reduced pressure. The residue was roughly purified by medium-pressure chromatography (Isolera, eluent: *n*-hexane to 94:6 *n*-hexane/EtOAc) to give a colorless oil (1.66 g, a desired acetate and by-products). To a solution of the mixture (1.66 g) in THF/MeOH (7/3, 50 mL) was added 1M-LiOH solution (14 mL 14.0 mmol) and the mixture was stirred for 3 h. MeOH and THF were removed under reduced pressure and the mixture was extracted with Et<sub>2</sub>O. The combined organic layers were dried over Na<sub>2</sub>SO<sub>4</sub> and concentrated under reduced pressure. The crude product (1.48 g) was used for the next reaction without further purification. The mixture (1.48 g) and MeC(OMe)<sub>2</sub>NMe<sub>2</sub> (3.8 mL) were dissolved in xylene (55 mL). The mixture was stirred at reflux temperature, and MeOH was removed in a Dean Stark apparatus with MS4A. After 5 h, the solvent was removed under reduced pressure. The crude product was purified by medium-pressure chromatography (Isolera, eluent: 95:5 *n*-hexane/EtOAc to 60:40 *n*-hexane/EtOAc) to afford **17** (1.64 g, 50% in 2 steps) as a red oil:  $[\alpha]_{\text{D}}^{21}$  -55.8 (*c* 1.40, CHCl<sub>3</sub>).  $^1\text{H}$

NMR (400 MHz, CDCl<sub>3</sub>)  $\delta_{\text{H}}$ : 7.69–7.64 (m, 4H), 7.34–7.44 (m, 6H), 5.82 (brs, 1H), 5.73 (brs, 1H), 5.66–5.57 (m, 1H), 3.66 (t,  $J$ =6.5 Hz, 2H), 3.12–3.04 (m, 1H), 2.98 (s, 3H), 2.95 (s, 3H), 2.45–2.20 (m, 4H), 2.12 (dd,  $J$ =14.7, 10.1 Hz, 1H), 1.96 (ddq,  $J$ =15.7, 8.5, 2.2 Hz, 1H), 1.59–1.50 (m, 2H), 1.44–1.20 (m, 8H), 1.04 (s, 9H); <sup>13</sup>C NMR (100 MHz, CDCl<sub>3</sub>)  $\delta_{\text{C}}$ : 172.68, 135.61, 135.53, 134.12, 130.25, 129.44, 127.53, 63.95, 43.51, 41.32, 37.44, 37.22, 35.42, 33.14, 32.57, 30.51, 29.69, 28.72, 26.87, 25.78, 19.22; IR (neat) cm<sup>-1</sup>: 3047, 2927, 1651, 1103; HRMS (ESI, positive)  $m/z$  [M+Na]<sup>+</sup> Calcd. for C<sub>31</sub>H<sub>45</sub>NNaO<sub>2</sub>Si: 514.3117, Found: 514.3092.

**Synthesis of diol 18.** To a solution of **17** (1.58 g 3.22 mmol), KH<sub>2</sub>PO<sub>4</sub> (580 mg, 4.26 mmol) and Na<sub>2</sub>HPO<sub>4</sub>·H<sub>2</sub>O (136 mg, 853  $\mu$ mol) in THF/H<sub>2</sub>O (1/1, 46 mL) was added I<sub>2</sub> (1.63 g, 6.44 mmol) and the mixture was stirred for 14 h. The reaction was quenched with saturated aqueous Na<sub>2</sub>S<sub>2</sub>O<sub>3</sub> and the mixture was extracted with Et<sub>2</sub>O. The combined organic layers were dried over Na<sub>2</sub>SO<sub>4</sub> and concentrated under reduced pressure. The residue was purified by medium-pressure chromatography (Isolera, eluent: 95:5 *n*-hexane/EtOAc to 60:40 *n*-hexane/EtOAc) to give an iodolactone intermediate (1.58 g, 83%) as an orange oil.  $[\alpha]_{\text{D}}^{20} +2.1$  ( $c$  1.00, CHCl<sub>3</sub>). <sup>1</sup>H NMR (400 MHz, CDCl<sub>3</sub>)  $\delta_{\text{H}}$ : 7.68-7.63 (m, 4H), 7.44-7.34 (m, 6H), 5.26 (d,  $J$  = 6.4 Hz, 1H), 4.45 (d,  $J$  = 5.1 Hz, 1H), 3.65 (t,  $J$  = 6.6 Hz, 2H), 3.15-3.05 (m, 1H), 2.72-2.60 (m, 1H), 2.59 (dd,  $J$  = 18.8, 10.5 Hz, 1H), 2.49 (dd,  $J$  = 18.8, 3.9 Hz, 1H), 2.09 (dd,  $J$  = 14.7, 5.8 Hz, 1H), 1.64 (ddd,  $J$  = 14.7, 12.4, 5.1 Hz, 1H), 1.55 (quintet,  $J$  = 6.6 Hz, 1H), 1.42-1.18 (m, 8H), 1.05 (s, 9H); <sup>13</sup>C NMR (100 MHz, CDCl<sub>3</sub>)  $\delta_{\text{C}}$ : 176.47, 135.53, 134.06, 129.48, 127.55, 92.72, 63.82, 40.38, 40.15, 38.83, 32.42, 29.96, 29.39, 28.70, 28.37, 28.19, 26.88, 25.63, 19.23; IR (neat) cm<sup>-1</sup>: 3066, 2927, 1786, 1466, 1165, 1107; HRMS (ESI, positive)  $m/z$  [M+Na]<sup>+</sup> Calcd. for C<sub>29</sub>H<sub>39</sub>INaO<sub>3</sub>Si: 613.1611, Found: 613.1587.

To a solution of the iodolactone intermediate (1.54 g 2.61 mmol) in THF (8 mL) was added DBU (480  $\mu$ L, 3.21 mmol) and the mixture was stirred at reflux temperature for 8 h. The reaction mixture was cooled to -30 °C and LiAlH<sub>4</sub> (292 mg, 7.7 mmol) was added. After being stirred at 0 °C for 40 min, the reaction mixture was quenched with EtOAc and then a homogeneous mixture of SiO<sub>2</sub>/K<sub>2</sub>CO<sub>3</sub>/H<sub>2</sub>O (10/1/3, 12.4 g) was added. The mixture was stirred for 40 min and the solids were removed by filtration and washed thoroughly with EtOAc. The filtrate was evaporated and the residue was purified by medium-pressure chromatography (Isolera, eluent: 88:12 *n*-hexane/EtOAc to EtOAc) to give **18** (1.11 g, 91%) as a pale yellow oil.  $[\alpha]_{\text{D}}^{19} +34.5$  ( $c$  1.03, CHCl<sub>3</sub>). <sup>1</sup>H NMR (400 MHz, CDCl<sub>3</sub>)  $\delta_{\text{H}}$ : 7.68-7.63 (m, 4H), 7.44-7.33 (m, 6H), 6.19 (dd,  $J$  = 5.8, 2.7 Hz, 1H), 5.96 (brd,  $J$  = 5.8 Hz, 1H), 4.60 (brd,  $J$  = 5.4 Hz, 1H), 3.89 (dt,  $J$  = 9.5, 5.0 Hz, 1H), 3.76 (td,  $J$  = 9.5, 4.1 Hz, 1H), 3.64 (t,  $J$  = 6.4 Hz, 2H), 2.50-2.42 (m, 1H), 2.10 (dq,  $J$  = 11.1, 7.4 Hz, 1H), 2.03-1.84 (m, 3H), 1.69 (dq,  $J$  = 14.1, 4.7 Hz, 1H), 1.55 (quintet,  $J$  = 7.4 Hz, 2H), 1.42-1.15 (m, 6H), 1.04 (s, 9H); <sup>13</sup>C NMR (100 MHz, CDCl<sub>3</sub>)  $\delta_{\text{C}}$ : 141.11, 135.53, 134.12, 131.77, 129.45, 127.53, 76.38, 63.94, 62.84, 46.79, 44.58, 33.53, 32.55, 29.63, 28.04, 28.01, 26.87, 25.74, 19.23; IR (neat) cm<sup>-1</sup>: 3336, 2931, 2858, 1107, 702; HRMS (ESI, positive)  $m/z$  [M+Na]<sup>+</sup> Calcd. for C<sub>29</sub>H<sub>42</sub>NaO<sub>3</sub>Si: 489.2801, Found: 489.2789.

**Synthesis of bis-TES ether 19.** To a solution of **18** (773 mg, 1.66 mmol) and imidazole (451 mg, 247 mmol) in DMF (10 mL) was added TESCl (832  $\mu$ L, 4.97 mmol). The mixture was stirred for 13 h and the



reaction was quenched with saturated aqueous NaHCO<sub>3</sub>. The mixture was extracted with *n*-hexane. The combined organic layers were dried over Na<sub>2</sub>SO<sub>4</sub> and concentrated under reduced pressure. The residue was purified by medium-pressure chromatography (Isolera, eluent: *n*-hexane to 98:2 *n*-hexane/EtOAc) to give **19** (1.06 g, 92%) as a colorless oil.  $[\alpha]_D^{20}$  -1.3 (*c* 1.18, CHCl<sub>3</sub>). <sup>1</sup>H NMR (400 MHz, CDCl<sub>3</sub>)  $\delta_H$ : 7.66 (dd, *J* = 7.7, 1.5 Hz, 4H), 7.44-7.33 (m, 6H), 6.10 (dd, *J* = 5.8, 2.7 Hz, 1H), 5.82 (brd, *J* = 5.8 Hz, 1H), 4.47 (dd, *J* = 5.9, 2.3 Hz, 1H), 3.74-3.60 (m, 4H), 2.35 (brs, 1H), 2.07 (quintet, *J* = 7.0 Hz, 1H), 1.79 (dq, *J* = 13.8, 7.0 Hz, 1H), 1.64 (dq, *J* = 13.8, 7.0 Hz, 1H), 1.59-1.41 (m, 3H), 1.40-1.12 (m, 7H), 1.04 (s, 9H), 0.96 (t, *J* = 7.8 Hz, 9H), 0.93 (t, *J* = 7.8 Hz, 9H), 0.60 (q, *J* = 7.8 Hz, 6H), 0.56 (q, *J* = 7.8 Hz, 6H); <sup>13</sup>C NMR (100 MHz, CDCl<sub>3</sub>)  $\delta_C$ : 140.21, 135.54, 134.17, 132.58, 129.43, 127.52, 76.18, 64.00, 62.04, 46.09, 42.79, 32.61, 32.52, 29.79, 28.79, 28.01, 26.87, 25.81, 19.22, 6.95, 6.84, 5.24, 4.45; IR (neat) cm<sup>-1</sup>: 2951, 2877, 1103, 737; HRMS (ESI, positive) *m/z* [M+Na]<sup>+</sup> Calcd. for C<sub>41</sub>H<sub>70</sub>NaO<sub>3</sub>Si<sub>3</sub>: 717.4530, Found: 717.4511.

**Synthesis of diene 20.** To a solution of DMSO (210  $\mu$ L, 2.96 mmol) in CH<sub>2</sub>Cl<sub>2</sub> (2.2 mL) was added oxalyl chloride (120  $\mu$ L, 1.40 mmol) at -78 °C under an argon atmosphere. After the reaction mixture was stirred at -78 °C for 15 min, a solution of **19** (187 mg, 269  $\mu$ mol) in CH<sub>2</sub>Cl<sub>2</sub> (2.5 mL) was slowly added. After the reaction mixture was stirred at -65 °C for 1 h, Et<sub>3</sub>N (420  $\mu$ L, 3.01 mmol) was slowly added. The mixture was gradually warmed to room temperature for 30 min with stirring. The reaction mixture was quenched with saturated aqueous NH<sub>4</sub>Cl. The mixture was extracted with *n*-hexane. The organic layer was washed with saturated aqueous NaCl, dried over Na<sub>2</sub>SO<sub>4</sub>, and filtered. The reaction mixture was concentrated under reduced pressure to afford **11** (192 mg, mixture). The crude product was used for the next reaction without further purification. To a suspension of [Ph<sub>3</sub>P(CH<sub>2</sub>)<sub>2</sub>Me]<sup>+</sup>Br<sup>-</sup> (356 mg, 924  $\mu$ mol) in THF (3.6 mL) was added NaHMDS (1.0 M in THF, 450  $\mu$ L, 450  $\mu$ mol). The mixture was stirred for 40 min and cooled to -78 °C. To this solution were added DMF (540  $\mu$ L) and a solution of **11** (192 mg, mixture) in THF (3.3 mL). The reaction mixture was gradually warmed to room temperature for 2 h. Then, the reaction was quenched with saturated aqueous NH<sub>4</sub>Cl and extracted with *n*-hexane. The combined organic layers were washed with saturated aqueous NaCl, dried over Na<sub>2</sub>SO<sub>4</sub> and concentrated under reduced pressure. The residue was purified by medium-pressure chromatography (Isolera, eluent: *n*-hexane to 4:96 *n*-hexane/EtOAc) to give **20** (116 mg, 71% in 2 steps) as a colorless oil.  $[\alpha]_D^{23}$  +1.6 (*c* 1.13, CHCl<sub>3</sub>). <sup>1</sup>H NMR (400 MHz, CDCl<sub>3</sub>)  $\delta_H$ : 7.69-7.63 (m, 4H), 7.44-7.31 (m, 6H), 6.10 (dd, *J* = 5.9, 2.7 Hz, 1H), 5.83 (brd, *J* = 5.9 Hz, 1H), 5.48-5.30 (m, 2H), 4.49 (dd, *J* = 5.8, 2.3 Hz, 1H), 3.64 (t, *J* = 6.5 Hz, 2H), 2.38 (brs, 1H), 2.19 (t, *J* = 7.1 Hz, 1H), 2.08 (quintet, *J* = 7.1 Hz, 1H), 1.96 (quintet, *J* = 7.1 Hz, 1H), 1.60-1.45 (m, 5H), 1.40-1.14 (m, 7H), 1.04 (s, 9H), 0.97 (t, *J* = 7.5 Hz, 3H), 0.94 (t, *J* = 7.9 Hz, 9H), 0.57 (q, *J* = 7.9 Hz, 6H); <sup>13</sup>C NMR (100 MHz, CDCl<sub>3</sub>)  $\delta_C$ : 140.13, 135.54, 134.15, 132.67, 131.61, 129.43, 128.71, 127.53, 76.27, 63.99, 47.22, 46.03, 32.61, 32.36, 29.79, 28.04, 26.87, 25.82, 23.24, 20.79, 19.22, 14.29, 6.96, 5.22; IR (neat) cm<sup>-1</sup>: 2931, 2877, 1107, 1011, 737, 706; HRMS (ESI, positive) *m/z* [M+Na]<sup>+</sup> Calcd. for C<sub>38</sub>H<sub>60</sub>NaO<sub>2</sub>Si<sub>2</sub>: 627.4030, Found: 627.4004.

**Synthesis of diene 21.** To a solution of DMSO (514  $\mu$ L, 7.25 mmol) in CH<sub>2</sub>Cl<sub>2</sub> (8.0 mL) was added oxalyl chloride (310  $\mu$ L, 3.62 mmol) at -78 °C under an argon atmosphere. After the reaction mixture was stirred at -78 °C for 15 min, a solution of **19** (504 mg, 725  $\mu$ mol) in CH<sub>2</sub>Cl<sub>2</sub> (8.0 mL) was slowly added. After the

reaction mixture was stirred at -65 °C for 40 min, Et<sub>3</sub>N (1.11 mL, 7.97 mmol) was slowly added. The mixture was gradually warmed to room temperature for 1 h with stirring. The reaction mixture was quenched with saturated aqueous NH<sub>4</sub>Cl. The mixture was extracted with *n*-hexane. The organic layer was washed with saturated aqueous NaCl, dried over Na<sub>2</sub>SO<sub>4</sub>, and filtered. The reaction mixture was concentrated under reduced pressure to afford **11** (446 mg, mixture). The crude product was used for the next reaction without further purification. To a suspension of [Ph<sub>3</sub>P(CH<sub>2</sub>)<sub>3</sub>OTHP]<sup>+</sup>Br<sup>-</sup> (1.06 g, 2.18 mmol) in THF (12 mL) was added NaHMDS (1.0 M in THF, 1.14 mL, 1.14 mmol). The mixture was stirred for 40 min and cooled to -78 °C. To this solution were added DMF (1.32 mL) and a solution of **11** (446 mg, mixture) in THF (12 mL). The reaction mixture was gradually warmed to room temperature for 2 h. Then, the reaction was quenched with saturated aqueous NH<sub>4</sub>Cl and extracted with *n*-hexane. The combined organic layers were washed with saturated aqueous NaCl, dried over Na<sub>2</sub>SO<sub>4</sub> and concentrated under reduced pressure. The residue was purified by medium-pressure chromatography (Isolera, eluent: 99:1 *n*-hexane/EtOAc to 92:8 *n*-hexane/EtOAc) to give **21** (391 mg, 76% in 2 steps) as a paleyellow oil. [ $\alpha$ ]<sub>D</sub><sup>20</sup> +34.8 (*c* 1.95, CHCl<sub>3</sub>). <sup>1</sup>H NMR (400 MHz, CDCl<sub>3</sub>)  $\delta$ <sub>H</sub>: 7.71-7.61 (m, 4H), 7.44-7.33 (m, 6H), 6.10 (dd, *J* = 5.8, 2.9 Hz, 1H), 5.83 (dq, *J* = 5.8, 1.4 Hz, 1H), 5.58 (brdt, *J* = 10.8, 7.1 Hz, 1H), 5.40 (brdt, *J* = 10.8, 7.1 Hz, 1H), 4.60 (dd, *J* = 4.2, 2.9 Hz, 1H), 4.49 (dd, *J* = 5.8, 2.4 Hz, 1H), 3.87 (ddd, *J* = 10.8, 7.3, 2.9 Hz, 1H), 3.75 (dt, *J* = 9.4, 7.3 Hz, 1H), 3.64 (t, *J* = 6.6 Hz, 2H), 3.54-3.45 (m, 1H), 3.42 (dt, *J* = 9.4, 7.1 Hz, 1H), 2.45-2.34 (m, 3H), 2.29-2.15 (m, 2H), 1.98 (quintet, *J* = 7.1 Hz, 1H), 1.89-1.76 (m, 1H), 1.75-1.66 (m, 1H), 1.66-1.43 (m, 6H), 1.42-1.14 (m, 8H), 1.04 (s, 9H), 0.94 (t, *J* = 7.9 Hz, 9H), 0.57 (q, *J* = 7.9 Hz, 6H); <sup>13</sup>C NMR (100 MHz, CDCl<sub>3</sub>)  $\delta$ <sub>C</sub>: 140.10, 135.53, 134.14, 132.65, 131.34, 129.42, 127.52, 125.62, 98.70, 76.16, 67.07, 63.99, 62.24, 47.11, 46.02, 32.60, 32.43, 30.72, 29.79, 28.18, 28.04, 26.86, 25.83, 25.50, 23.44, 19.59, 19.21, 6.96, 5.20; IR (neat) cm<sup>-1</sup>: 2935, 2873, 1107; HRMS (ESI, positive) *m/z* [M+Na]<sup>+</sup> Calcd. for C<sub>43</sub>H<sub>68</sub>NaO<sub>4</sub>Si<sub>2</sub>: 727.4544, Found: 727.4560.

**Synthesis of diol 22.** To a solution of **21** (201 mg, 285  $\mu$ mol) in THF (10 mL) was added 1 M TBAF in THF (1.42 mL, 1.42 mmol). After being stirred at room temperature for 14 h, the solvent was removed under reduced pressure. The reaction mixture was quenched with saturated aqueous NH<sub>4</sub>Cl. The mixture was extracted with EtOAc. The organic layer was washed with saturated aqueous NaCl, dried over Na<sub>2</sub>SO<sub>4</sub>, and filtered. The residue was purified by medium-pressure chromatography (Isolera, eluent: 88:12 *n*-hexane/EtOAc to EtOAc) to give **22** (97.9 mg, 72%) as a colorless oil. [ $\alpha$ ]<sub>D</sub><sup>20</sup> +127.1 (*c* 0.52, CHCl<sub>3</sub>). <sup>1</sup>H NMR (400 MHz, CDCl<sub>3</sub>)  $\delta$ <sub>H</sub>: 7.71 (dd, *J* = 5.8, 2.7 Hz, 1H), 6.18 (dd, *J* = 5.8, 1.7 Hz, 1H), 5.59 (dt, *J* = 9.7, 7.2, 1.4 Hz, 1H), 5.45 (dt, *J* = 9.7, 7.3, 1.7 Hz, 1H), 3.68 (t, *J* = 6.5 Hz, 2H), 3.04-2.95 (m, 1H), 2.56-2.44 (m, 2H), 2.43-2.27 (m, 4H), 2.27-2.14 (m, 1H), 1.79-1.56 (m, 3H), 1.51-1.29 (m, 4H), 1.28-1.16 (m, 1H); <sup>13</sup>C NMR (100 MHz, CDCl<sub>3</sub>)  $\delta$ <sub>C</sub>: 211.01, 178.48, 167.04, 132.54, 130.66, 126.75, 62.01, 49.44, 44.30, 33.77, 30.94, 30.49, 29.10, 27.22, 24.39, 24.18; IR (film) cm<sup>-1</sup>: 3433, 2935, 1705; <sup>13</sup>C NMR (100 MHz, CDCl<sub>3</sub>)  $\delta$ <sub>C</sub>: 141.15, 141.13, 132.06, 132.00, 130.91, 130.75, 127.16, 127.09, 99.17, 98.76, 75.49, 75.45, 67.26, 66.88, 62.93, 62.21, 62.10, 46.46, 46.41, 45.90, 45.88, 33.47, 33.42, 32.73, 30.38, 30.27, 29.68, 28.04, 25.68, 25.32, 25.29, 23.57, 23.49, 19.35 (a diastereomeric mixture derived from the THP group); IR (neat) cm<sup>-1</sup>: 3409, 2931, 1030; HRMS (ESI, positive) *m/z* [M+Na]<sup>+</sup> Calcd. for C<sub>21</sub>H<sub>36</sub>NaO<sub>4</sub>: 375.2511, Found: 375.2503.

**Synthesis of triol 23.** To a solution of **22** (75.0 mg, 213  $\mu$ mol) in MeOH (20 mL) was added PPTS (18.0 mg, 717  $\mu$ mol). After being stirred at 35 °C for 2 h, the solvent was removed under reduced pressure. The residue was purified by medium-pressure chromatography (Isolera, eluent: 99:1 CHCl<sub>3</sub>/MeOH to 90:10 CHCl<sub>3</sub>/MeOH) to give **23** (30.3 mg, 54%) as a colorless oil.  $[\alpha]_D^{21} +72.0$  (*c* 0.50, CHCl<sub>3</sub>). <sup>1</sup>H NMR (400 MHz, CDCl<sub>3</sub>)  $\delta_H$ : 6.21 (dd, *J* = 5.8, 2.7 Hz, 1H), 5.93 (brd, *J* = 5.8 Hz, 1H), 5.60 (td, *J* = 10.5, 4.3 Hz, 1H), 5.42 (td, *J* = 10.5, 5.2 Hz, 1H), 4.47 (dd, *J* = 5.4, 2.7 Hz, 1H), 3.75 (dt, *J* = 10.1, 4.6 Hz, 1H), 3.65-3.55 (m, 3H), 2.88-2.37 (m, 4H), 2.24-2.13 (m, 1H), 2.12-1.98 (m, 2H), 1.63-1.49 (m, 3H), 1.47-1.19 (m, 6H), 1.19-1.05 (m, 1H); <sup>13</sup>C NMR (100 MHz, CDCl<sub>3</sub>)  $\delta_C$ : 141.50, 132.00, 131.82, 126.89, 75.59, 62.89, 61.71, 46.53, 45.91, 33.45, 32.69, 30.59, 29.65, 28.01, 25.63, 23.53; IR (neat) cm<sup>-1</sup>: 3336, 2927, 2858, 1053; HRMS (ESI, positive) *m/z* [M+Na]<sup>+</sup> Calcd. for C<sub>16</sub>H<sub>28</sub>NaO<sub>3</sub>: 291.1936, Found: 291.1926.

**Synthesis of dione 27.** To a solution of K<sub>2</sub>CO<sub>3</sub> (955 mg, 6.91 mmol) in water (8 mL) was slowly added 1,3-cyclopentanedione (678 mg, 6.91 mmol). The solution was heated to 60 °C and stirred as *cis*-1-bromopent-2-ene (1.03 g, 6.91 mmol) was added dropwise. After stirring for 23 h at 60 °C, the reaction mixture was allowed to cool to rt and 1M NaOH aq. was added until a pH of 12 was reached. The mixture was extracted with Et<sub>2</sub>O. The aqueous layer was chilled, and 2M HCl aq. was slowly added until pH 1 was reached. The product was extracted with CHCl<sub>3</sub>, dried over Na<sub>2</sub>SO<sub>4</sub>, and filtered. After evaporation, the residue was purified by medium-pressure chromatography (Isolera, eluent: 98:2 CHCl<sub>3</sub>/MeOH to 80:20 CHCl<sub>3</sub>/MeOH) to give **27** (286 mg, 25%) as a white solid. <sup>1</sup>H NMR (400 MHz, CDCl<sub>3</sub>)  $\delta_H$ : 5.51 (dtt, *J* = 10.8, 6.9, 1.7 Hz, 1H), 5.44 (dtt, *J* = 10.8, 7.5, 1.4 Hz, 1H), 2.94 (d, *J* = 6.9 Hz, 2H), 2.54 (s, 4H), 2.17 (quintet, *J* = 7.5 Hz, 2H), 0.99 (t, *J* = 7.5 Hz, 3H); <sup>13</sup>C NMR (100 MHz, CDCl<sub>3</sub>)  $\delta_C$ : 197.41, 134.12, 125.19, 116.63, 30.46, 20.65, 19.69, 14.23; IR (neat) cm<sup>-1</sup>: 2962.12, 2869.56, 1685.48, 1623.77, 1357.64, 1261.22; HRMS (ESI, positive) *m/z* [M + Na]<sup>+</sup> Calcd. for C<sub>10</sub>H<sub>14</sub>NaO<sub>2</sub>: 189.0891, found: 189.0887.

**Synthesis of cyclopentenone 28.** To a solution of **27** (279 mg, 1.68 mmol) in acetone (5 mL) were added K<sub>2</sub>CO<sub>3</sub> (255 mg, 1.85 mmol) and Me<sub>2</sub>SO<sub>4</sub> (193  $\mu$ L, 2.02 mmol). After being stirred at reflux temperature for 4 h, the reaction mixture was quenched with saturated aqueous NaHCO<sub>3</sub>. Then the water layer was extracted with CH<sub>2</sub>Cl<sub>2</sub>. The resulting organic layer was washed with saturated aqueous NaCl, dried over Na<sub>2</sub>SO<sub>4</sub>, and filtered. After evaporation, the residue was purified by medium-pressure chromatography (Isolera, eluent: 99:1 CHCl<sub>3</sub>/MeOH to 90:10 CHCl<sub>3</sub>/MeOH) to give **28** (304 mg, quant.) as a yellow oil. <sup>1</sup>H NMR (400 MHz, CDCl<sub>3</sub>)  $\delta_H$ : 5.38 (ddd, *J* = 10.7, 6.4, 1.6 Hz, 1H), 5.32 (ddd, *J* = 10.7, 6.9, 1.0 Hz, 1H), 3.95 (s, 3H), 2.88 (d, *J* = 6.4 Hz, 2H), 2.67-2.64 (m, 2H), 2.46-2.43 (m, 2H), 2.15 (quintet, *J* = 6.9, 1.0 Hz, 2H), 0.97 (t, *J* = 6.9 Hz, 3H); <sup>13</sup>C NMR (100 MHz, CDCl<sub>3</sub>)  $\delta_C$ : 204.52, 184.67, 132.27, 125.55, 119.80, 56.56, 33.59, 24.71, 20.57, 19.56, 14.32; IR (neat) cm<sup>-1</sup>: 2962.13, 2931.27, 1550.49, 1353.78, 1257.36; HRMS (ESI, positive) *m/z* [M + Na]<sup>+</sup> Calcd. for C<sub>11</sub>H<sub>16</sub>NaO<sub>2</sub>: 203.1048, found: 203.1037.

**Synthesis of dione 31.** A solution of allylpalladium (II) chloride dimer (138 mg, 377  $\mu$ mol) and dppe (599 mg, 1.50 mmol) in degassed THF (37 mL) was treated successively with allyl acetate (1.6 mL, 15.0 mmol),

1,3-cyclopentadione (2.20 g, 22.5 mmol), BSA (5.5 mL, 22.5 mmol) and sodium acetate (51.5 mg, 628  $\mu$ mol) at room temperature. After complete addition the reaction mixture was heated to reflux for 20 h. The solvent was removed under reduced pressure and the residue was taken up in dichloromethane (30 mL). The organic phase was washed with 1M HCl aq., the phases were separated and the aqueous phase was extracted with dichloromethane. The combined organic phases were dried with Na<sub>2</sub>SO<sub>4</sub>, filtered and the solvent was removed under reduced pressure. The residue was purified by medium-pressure chromatography (Isolera, eluent: 98:2 CHCl<sub>3</sub>/MeOH to 80:20 CHCl<sub>3</sub>/MeOH) to give **31** (1.66 g, 81%) as a pale yellow solid. All the analytical data are in the agreement with the reported data.<sup>1-3</sup>

**Synthesis of cyclopentenone 32.** To a solution of **31** (397 mg, 2.87 mmol) in acetone (8.5 mL) were added K<sub>2</sub>CO<sub>3</sub> (437 mg, 3.16 mmol) and Me<sub>2</sub>SO<sub>4</sub> (328  $\mu$ L, 3.44 mmol). After being stirred at reflux temperature for 3 h, the reaction mixture was quenched with saturated aqueous NaHCO<sub>3</sub>. Then the mixture was extracted with CH<sub>2</sub>Cl<sub>2</sub>. The resulting organic layer was washed with saturated aqueous NaCl, dried over Na<sub>2</sub>SO<sub>4</sub>, and filtered. After evaporation, the residue was purified by medium-pressure chromatography (Isolera, eluent: 99:1 CHCl<sub>3</sub>/MeOH to 90:10 CHCl<sub>3</sub>/MeOH) to give **32** (429 mg, 98%) as a yellow oil. All the analytical data are in the agreement with the reported data.<sup>4</sup>

**Synthesis of alcohol 33.** To a solution of THPO(CH<sub>2</sub>)<sub>6</sub>MgBr (1.0 M in THF, 7.0 mL, 7.00 mmol) was added to a solution of **32** (429 mg, 2.82 mmol) in THF (2.0 mL) at reflux temperature under an argon atmosphere. After being stirred at reflux temperature for 2 h, the reaction mixture was allowed to cool to rt and 10% HCl aq. (7 mL) was added. After 18 h of stirring at reflux temperature, H<sub>2</sub>O was added and the water layer was extracted with EtOAc. The combined organic layers were washed with saturated aqueous NaCl, dried over Na<sub>2</sub>SO<sub>4</sub> and concentrated under reduced pressure. After evaporation, the residue was purified by medium-pressure chromatography (Isolera, eluent: 88:12 *n*-hexane/EtOAc to EtOAc) to give **33** (226 mg, 36%) as a yellow oil. <sup>1</sup>H NMR (400 MHz, CDCl<sub>3</sub>)  $\delta$ <sub>H</sub>: 5.77 (ddt, *J* = 18.0, 9.4, 6.4 Hz, 1H), 4.96 (dq, *J* = 18.0, 2.0 Hz, 1H), 4.95 (dq, *J* = 9.4, 2.0 Hz, 1H), 3.65 (t, *J* = 6.4 Hz, 2H), 2.95 (d, *J* = 6.4 Hz, 2H), 2.54-2.52 (m, 2H), 2.43 (t, *J* = 7.8 Hz, 2H), 2.40-2.38 (m, 2H), 1.61-1.51 (m, 4H), 1.44-1.32 (m, 4H); <sup>13</sup>C NMR (100 MHz, CDCl<sub>3</sub>)  $\delta$ <sub>C</sub>: 209.53, 175.43, 137.99, 135.06, 115.27, 62.91, 34.28, 32.68, 31.28, 29.63, 29.33, 27.45, 27.39, 25.68; IR (neat) cm<sup>-1</sup>: 3429, 2931, 2858, 1693, 1639; HRMS (ESI, positive) *m/z* [M + Na]<sup>+</sup> Calcd. for C<sub>13</sub>H<sub>20</sub>NaO<sub>2</sub>: 245.1517, found: 245.1512.

**Synthesis of diol 34.** A 5 mL pear-shaped flask was charged with **33** (43.0 mg, 193  $\mu$ mol), CH<sub>2</sub>=CHCH<sub>2</sub>CH<sub>2</sub>OAc (145 mg, 1.27 mmol) and Hoveyda-Grubbs Catalyst® M2001 Umicore (8.5 mg, 13.4  $\mu$ mol). After 6 h of stirring, the residue was roughly purified by medium-pressure chromatography (Isolera, eluent: 99:1 CHCl<sub>3</sub>/MeOH to 90:10 CHCl<sub>3</sub>/MeOH) to give a mixture (26.7 mg). The crude mixture was used for the next reaction without further purification. To a solution of the mixture (26.7 mg) in MeOH (420  $\mu$ L) was added 0.3M-NaOH solution (1.3 mL, 390  $\mu$ mol) and the mixture was stirred at 50 ° for 1.5 h. The reaction mixture was quenched with 2M HCl aq. and the aqueous layer was extracted with EtOAc. The organic layer was washed with saturated aqueous NaCl, dried over Na<sub>2</sub>SO<sub>4</sub>, and filtered. After evaporation, the residue was purified medium-pressure chromatography (Isolera, eluent: 0.1:99:1 AcOH/CHCl<sub>3</sub>/MeOH

to 0.1:86:14 AcOH/CHCl<sub>3</sub>/MeOH) to give **34** (16.1 mg, 32% in 2 steps) as a colorless oil. <sup>1</sup>H NMR (400 MHz, CDCl<sub>3</sub>) δ<sub>H</sub>: 5.43 (dtt, *J* = 10.8, 7.2, 1.5 Hz, 1H), 5.37 (dtt, *J* = 10.8, 6.8, 1.3 Hz, 1H), 3.69 (t, *J* = 6.2 Hz, 2H), 3.66 (t, *J* = 6.4 Hz, 2H), 2.98 (d, *J* = 6.8 Hz, 2H), 2.53-2.51 (m, 2H), 2.49-2.43 (m, 4H), 2.38-2.36 (m, 2H), 1.61-1.52 (m, 4H), 1.46-1.34 (m, 4H); <sup>13</sup>C NMR (100 MHz, CDCl<sub>3</sub>) δ<sub>C</sub>: 210.25, 175.16, 138.82, 128.96, 127.10, 62.89, 62.20, 34.36, 32.65, 31.30, 31.01, 29.54, 29.42, 27.58, 25.65, 21.89; IR (neat) cm<sup>-1</sup>: 3410, 2931, 2862, 1686, 1635; HRMS (ESI, positive) *m/z* [M + Na]<sup>+</sup> Calcd. for C<sub>16</sub>H<sub>26</sub>NaO<sub>3</sub>: 289.1780, found: 289.1775.

### Supplementary References

1. P. K. Ruprah, J.-P. Cros, J. E. Pease, W. G. Whittingham and J. M. J. Williams, *Eur. J. Org. Chem.* 2002, 3145-3152.
2. E. Lacoste, E. Vaique, M. Berlande, I. Pianet, J.-M. Vincent and Y. Landais, *Eur. J. Org. Chem.* 2007, 167-177.
3. X.-M. Zhang, M. Wang, Y.-Q. Tu, C.-A. Fan, Y.-J. Jiang, S.-Y. Zhang and F.-M. Zhang, *Synlett* 2008, 2831-2835.
4. P. K. Ruprah, J.-P. Cros, J. E. Pease, W. G. Whittingham, J. M. J. Williams, *Eur. J. Org. Chem.* 2002, 3145-3152.

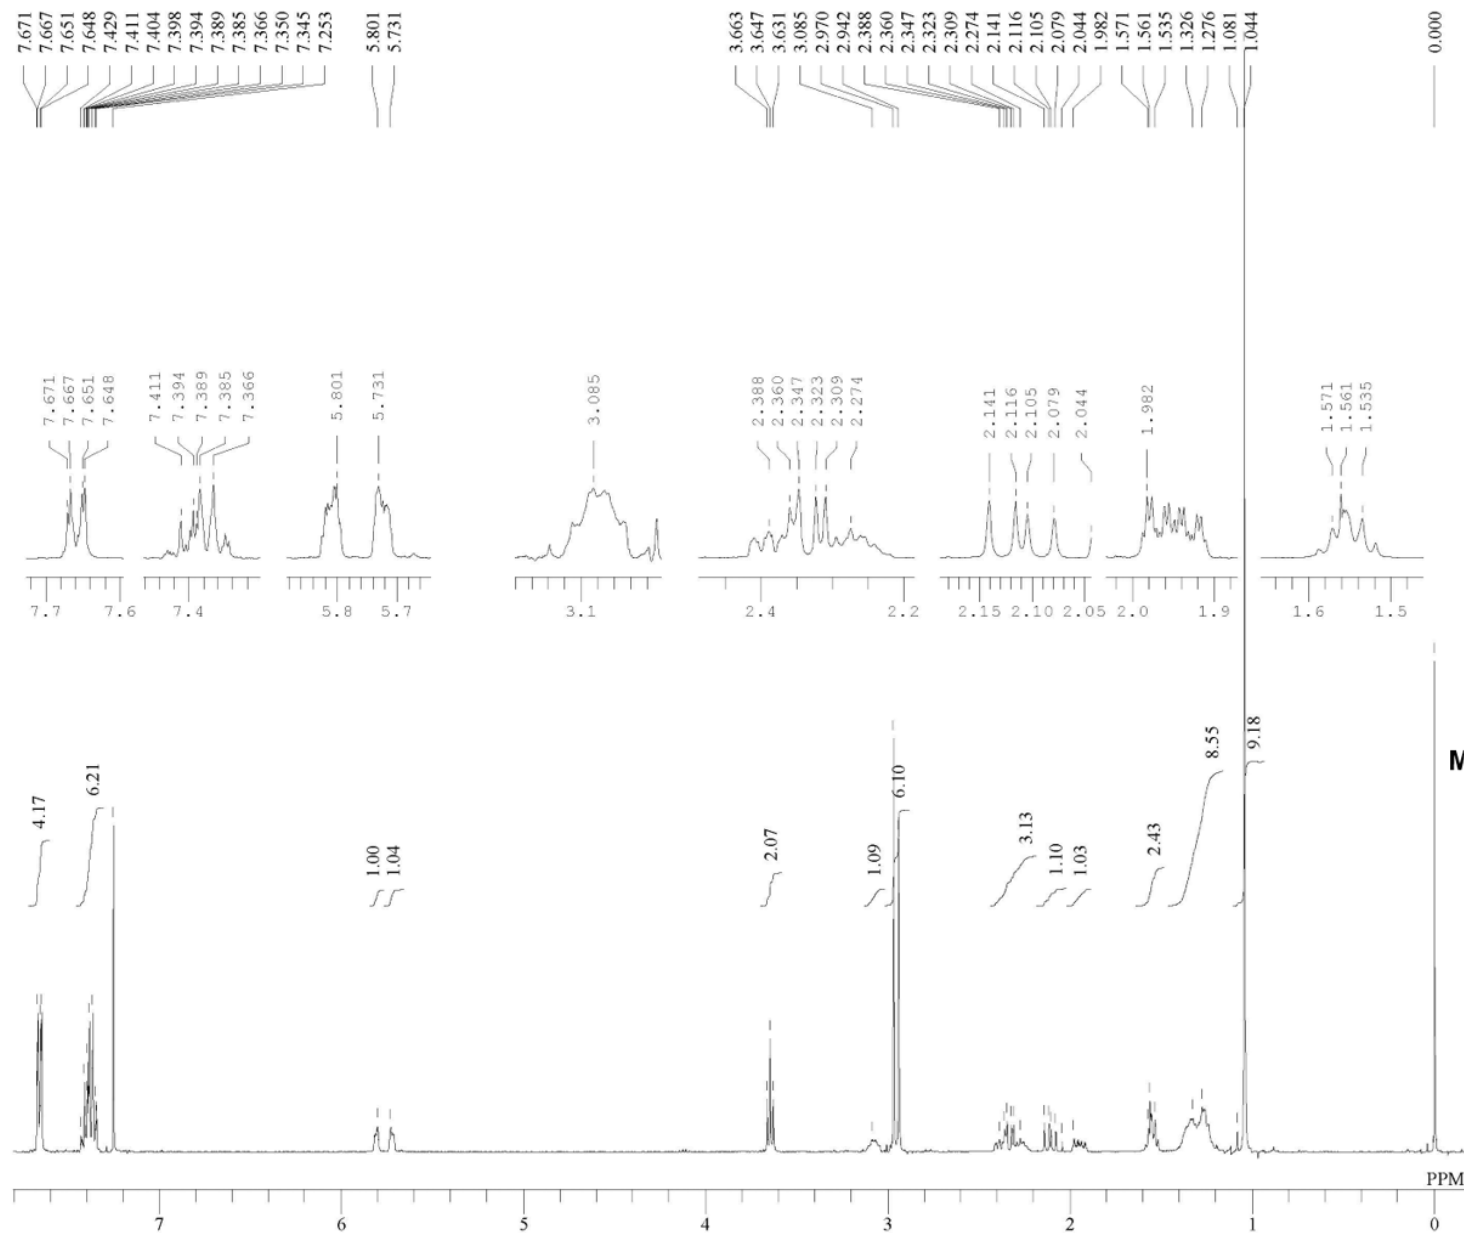

DFILE 1H\_17.jdf  
 COMNT single\_pulse  
 DATIM 02-04-2020 17:27:52  
 OBNUC 1H  
 EXMOD proton.jxp  
 OBFRQ 399.78 MHz  
 OBSET 4.19 KHz  
 OBFIN 7.29 Hz  
 POINT 16400  
 FREQU 7503.00 Hz  
 SCANS 8  
 ACQTM 2.1837 sec  
 PD 5.0000 sec  
 PW1 2.95 usec  
 IRNUC 1H  
 CTEMP 23.0 c  
 SLVNT CDCL3  
 EXREF 0.00 ppm  
 BF 0.25 Hz  
 RGAIN 54

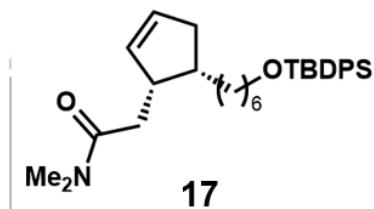



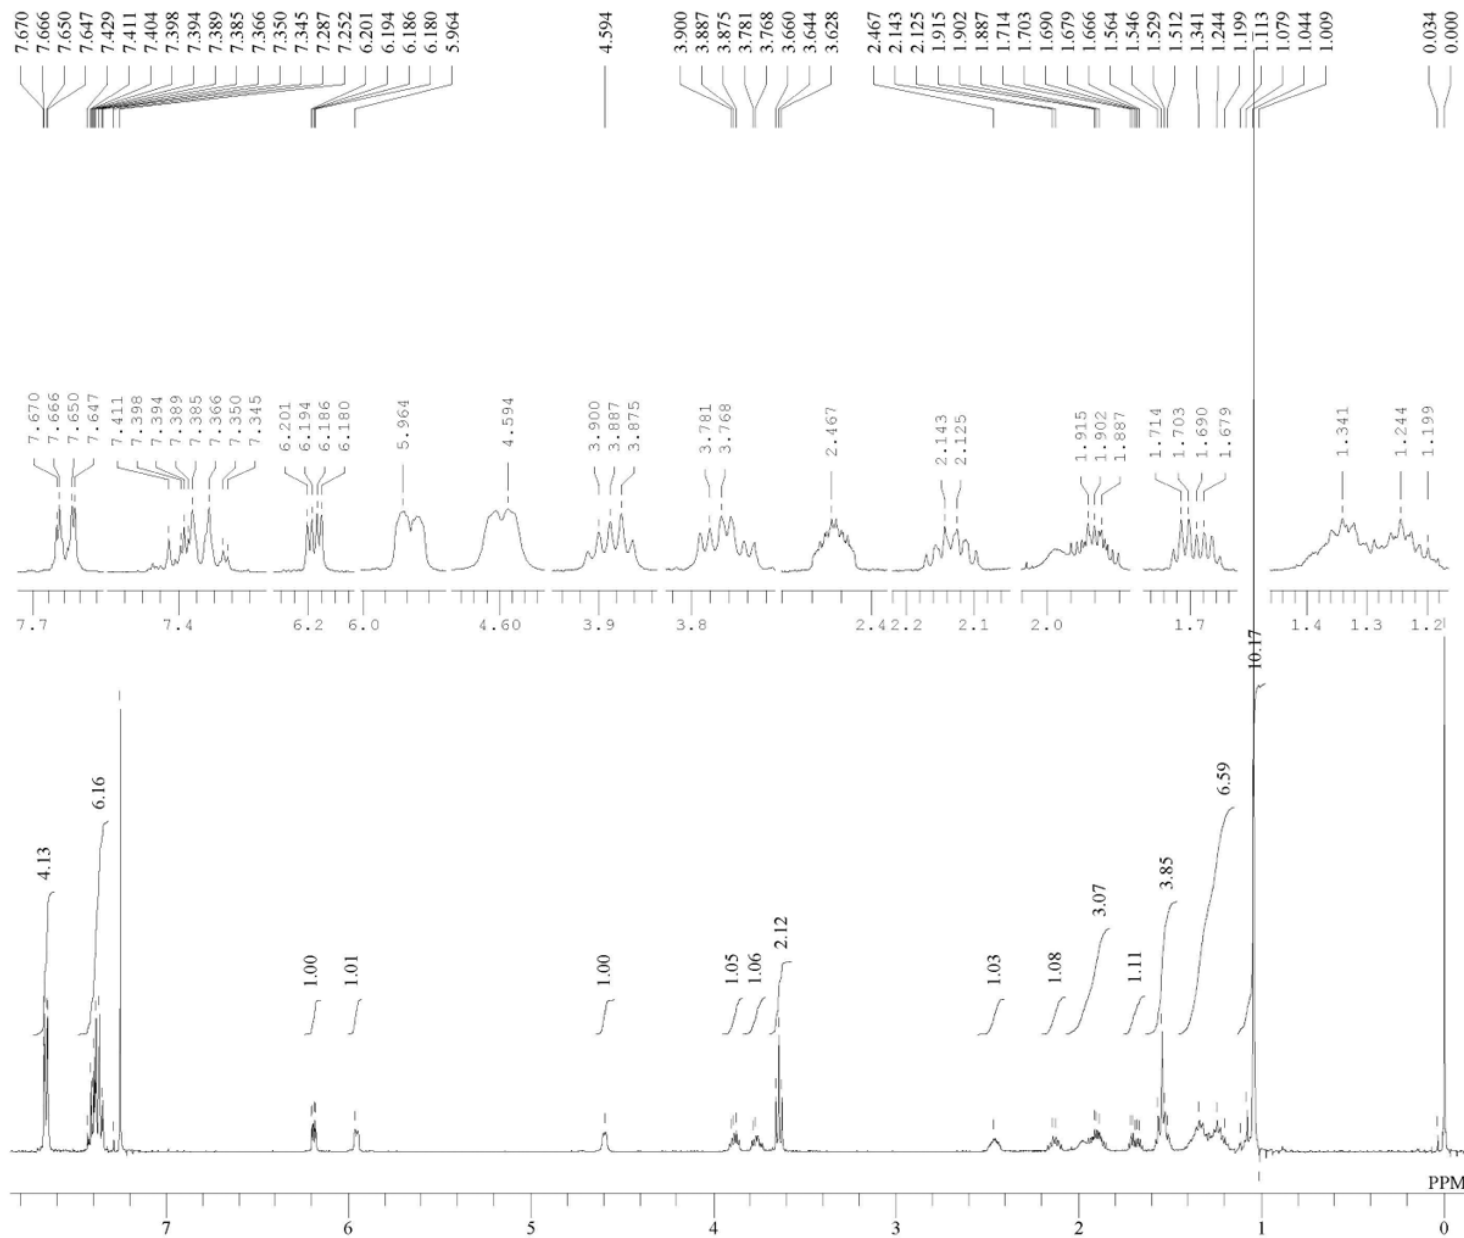

DFILE 1H\_18.jdf  
 COMNT single\_pulse  
 DATIM 05-04-2020 17:54:38  
 OBNUC 1H  
 EXMOD proton.jxp  
 OBFRQ 399.78 MHz  
 OBSET 4.19 KHz  
 OBFIN 7.29 Hz  
 POINT 16400  
 FREQU 7503.00 Hz  
 SCANS 8  
 ACQTM 2.1837 sec  
 PD 5.0000 sec  
 PW1 2.95 usec  
 IRNUC 1H  
 CTEMP 23.7 c  
 SLVNT CDCL3  
 EXREF 0.00 ppm  
 BF 0.25 Hz  
 RGAIN 56

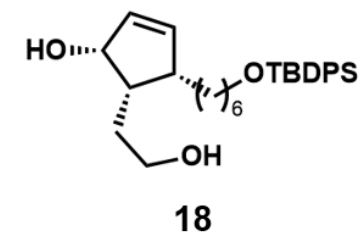





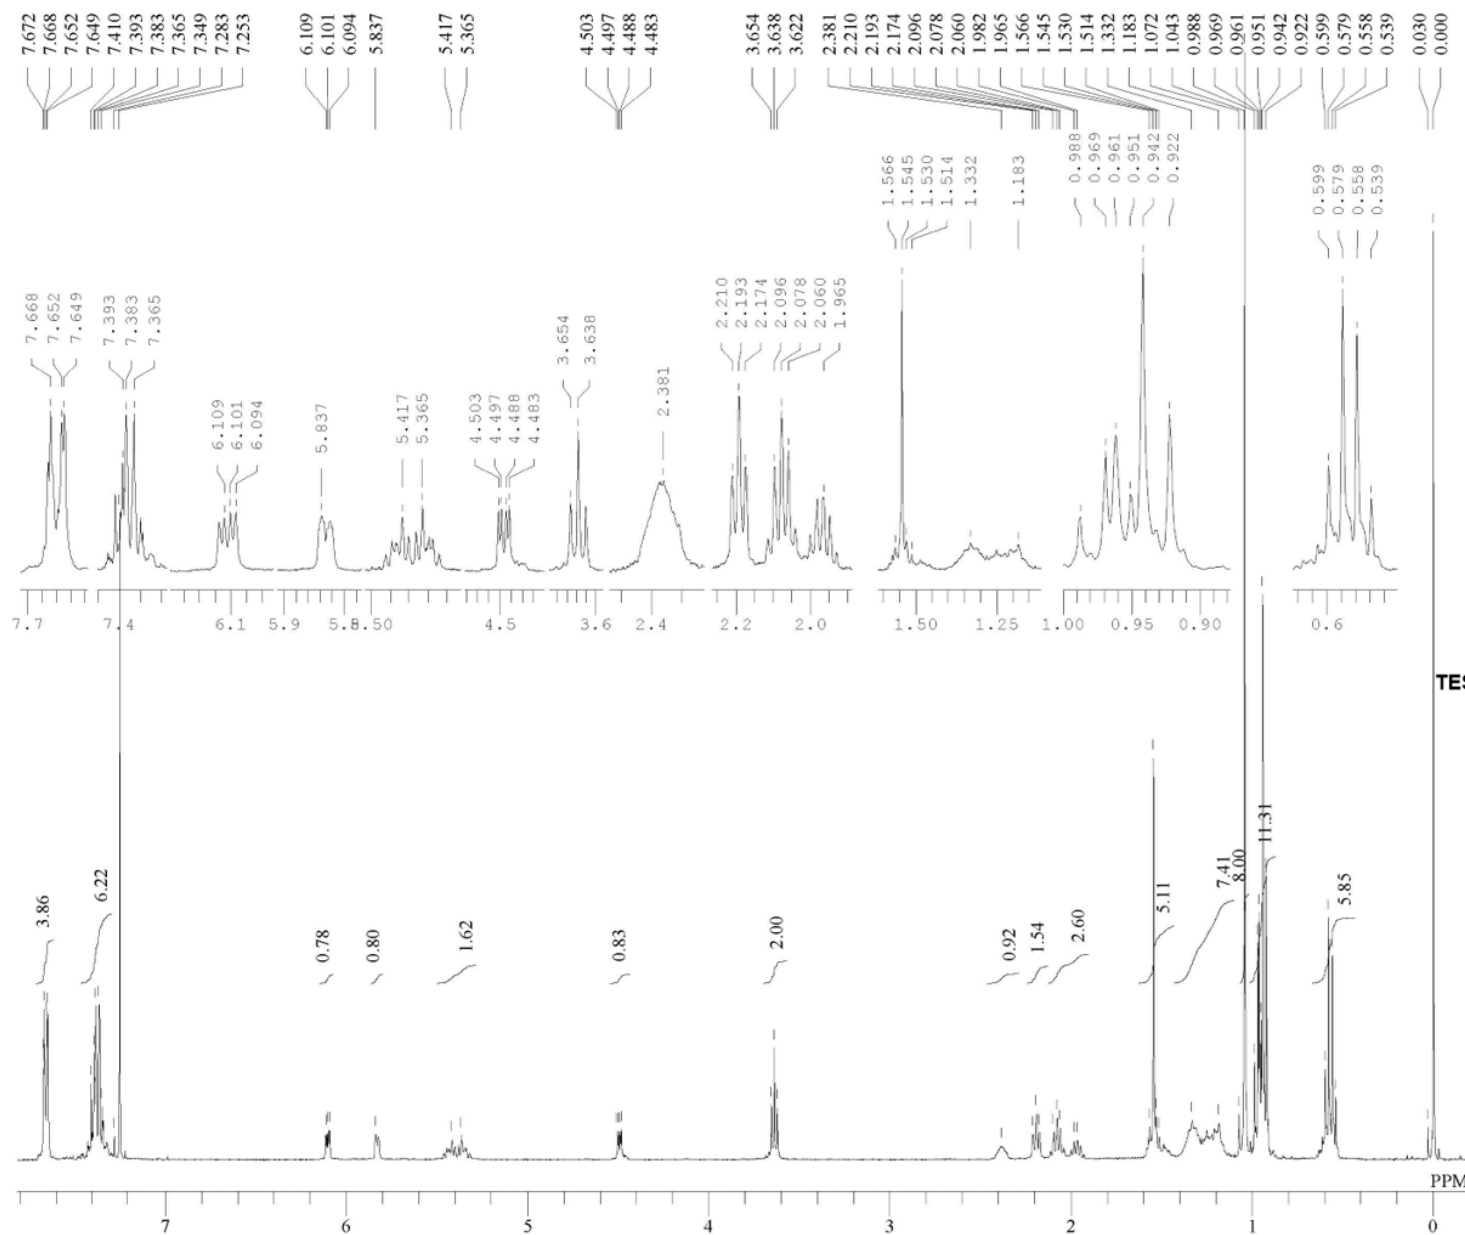

DFILE 1H\_20.jdf  
 COMNT single\_pulse  
 DATIM 21-08-2020 19:54:07  
 OBNUC 1H  
 EXMOD proton.jxp  
 OBFRQ 399.78 MHz  
 OBSET 4.19 KHz  
 OBFIN 7.29 Hz  
 POINT 16400  
 FREQU 7503.00 Hz  
 SCANS 8  
 ACQTM 2.1837 sec  
 PD 5.0000 sec  
 PW1 2.95 usec  
 IRNUC 1H  
 CTEMP 21.5 c  
 SLVNT CDCL3  
 EXREF 0.00 ppm  
 BF 0.25 Hz  
 RGAIN 56

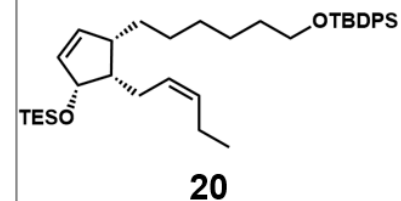

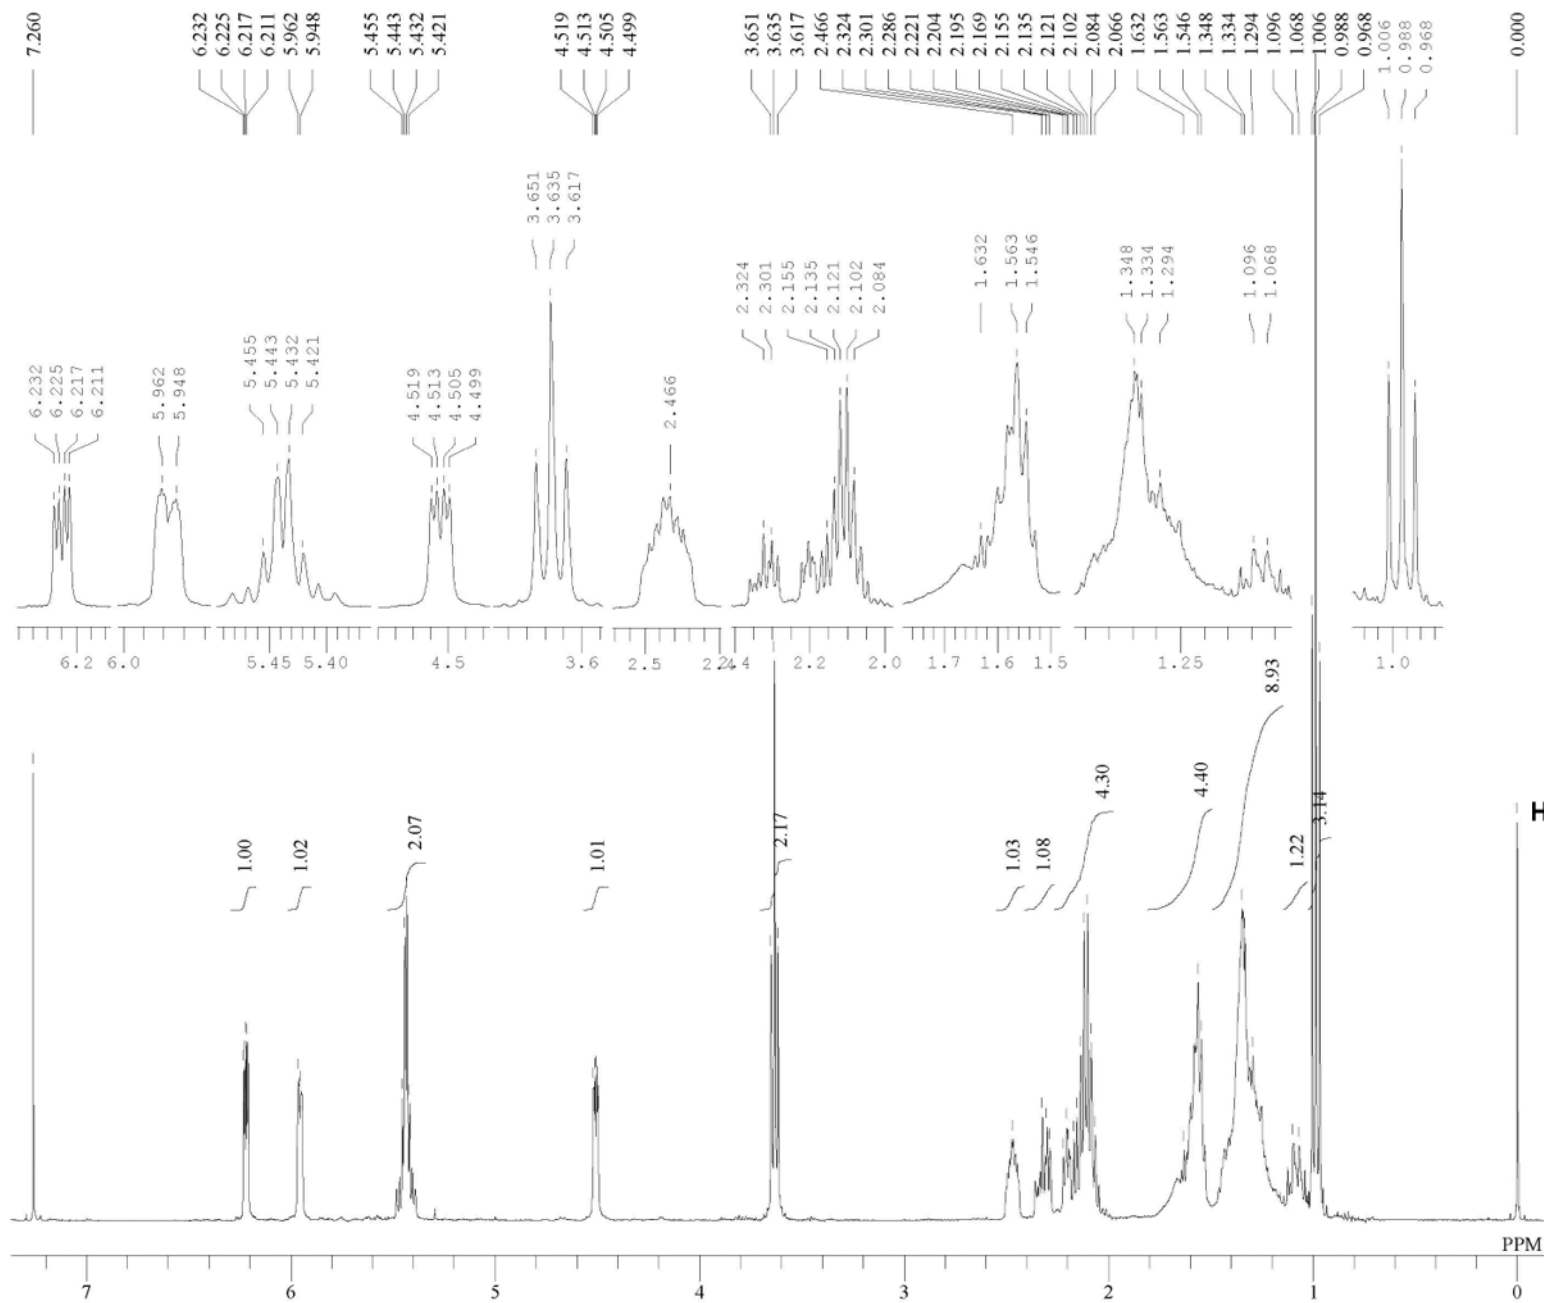

DFILE 1H\_diol.jdf  
 COMNT single\_pulse  
 DATIM 23-08-2020 20:27:39  
 OBNUC 1H  
 EXMOD proton.jxp  
 OBFRQ 399.78 MHz  
 OBSET 4.19 KHz  
 OBFIN 7.29 Hz  
 POINT 16400  
 FREQU 7503.00 Hz  
 SCANS 8  
 ACQTM 2.1837 sec  
 PD 5.0000 sec  
 PW1 2.95 usec  
 IRNUC 1H  
 CTEMP 21.6 c  
 SLVNT CDCL3  
 EXREF 0.00 ppm  
 BF 0.25 Hz  
 RGAIN 46

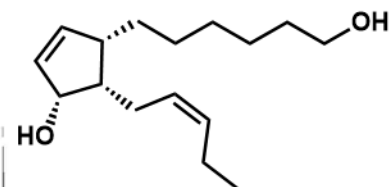

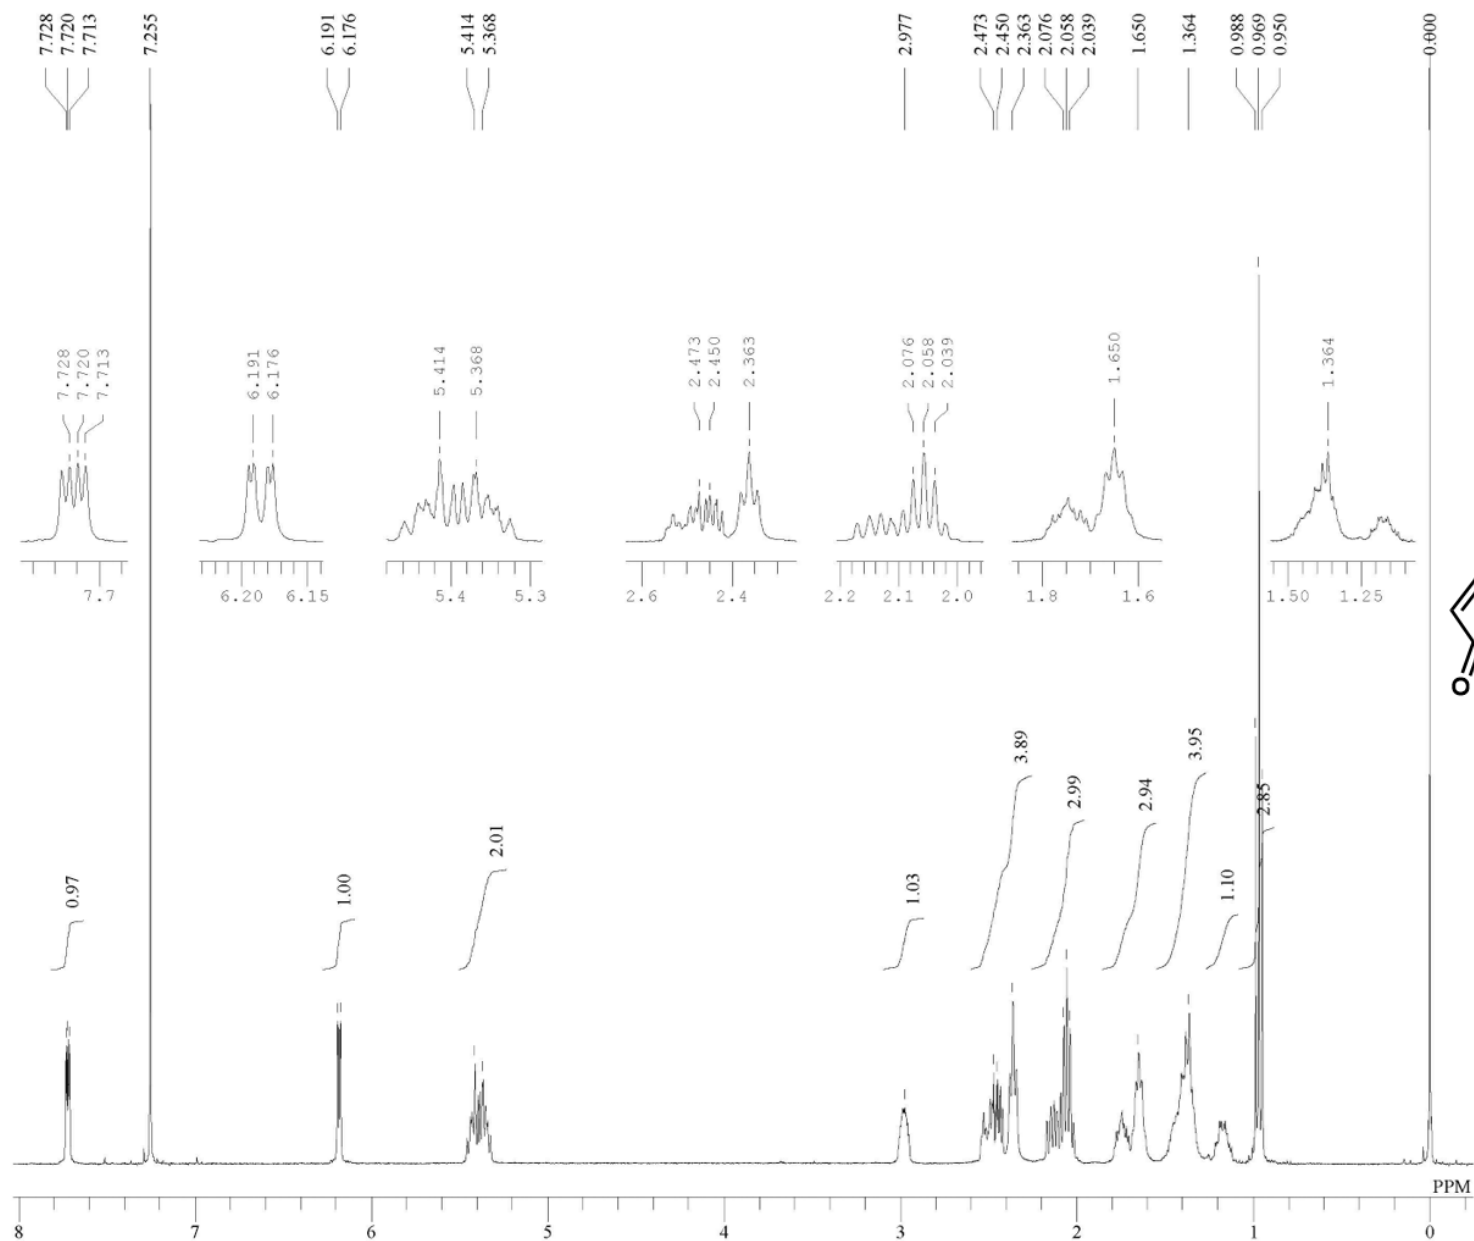

DFILE 1H\_04.jdf  
 COMNT single\_pulse  
 DATIM 13-04-2020 17:42:25  
 OBNUC 1H  
 EXMOD proton.jxp  
 OBFRQ 399.78 MHz  
 OBSET 4.19 KHz  
 OBFIN 7.29 Hz  
 POINT 16400  
 FREQU 7503.00 Hz  
 SCANS 8  
 ACQTM 2.1837 sec  
 PD 5.0000 sec  
 PW1 2.95 usec  
 IRNUC 1H  
 CTEMP 22.8 c  
 SLVNT CDCL3  
 EXREF 0.00 ppm  
 BF 0.25 Hz  
 RGAIN 56

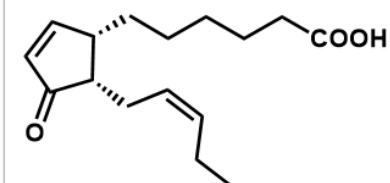

dn-*cis*-OPDA (4)





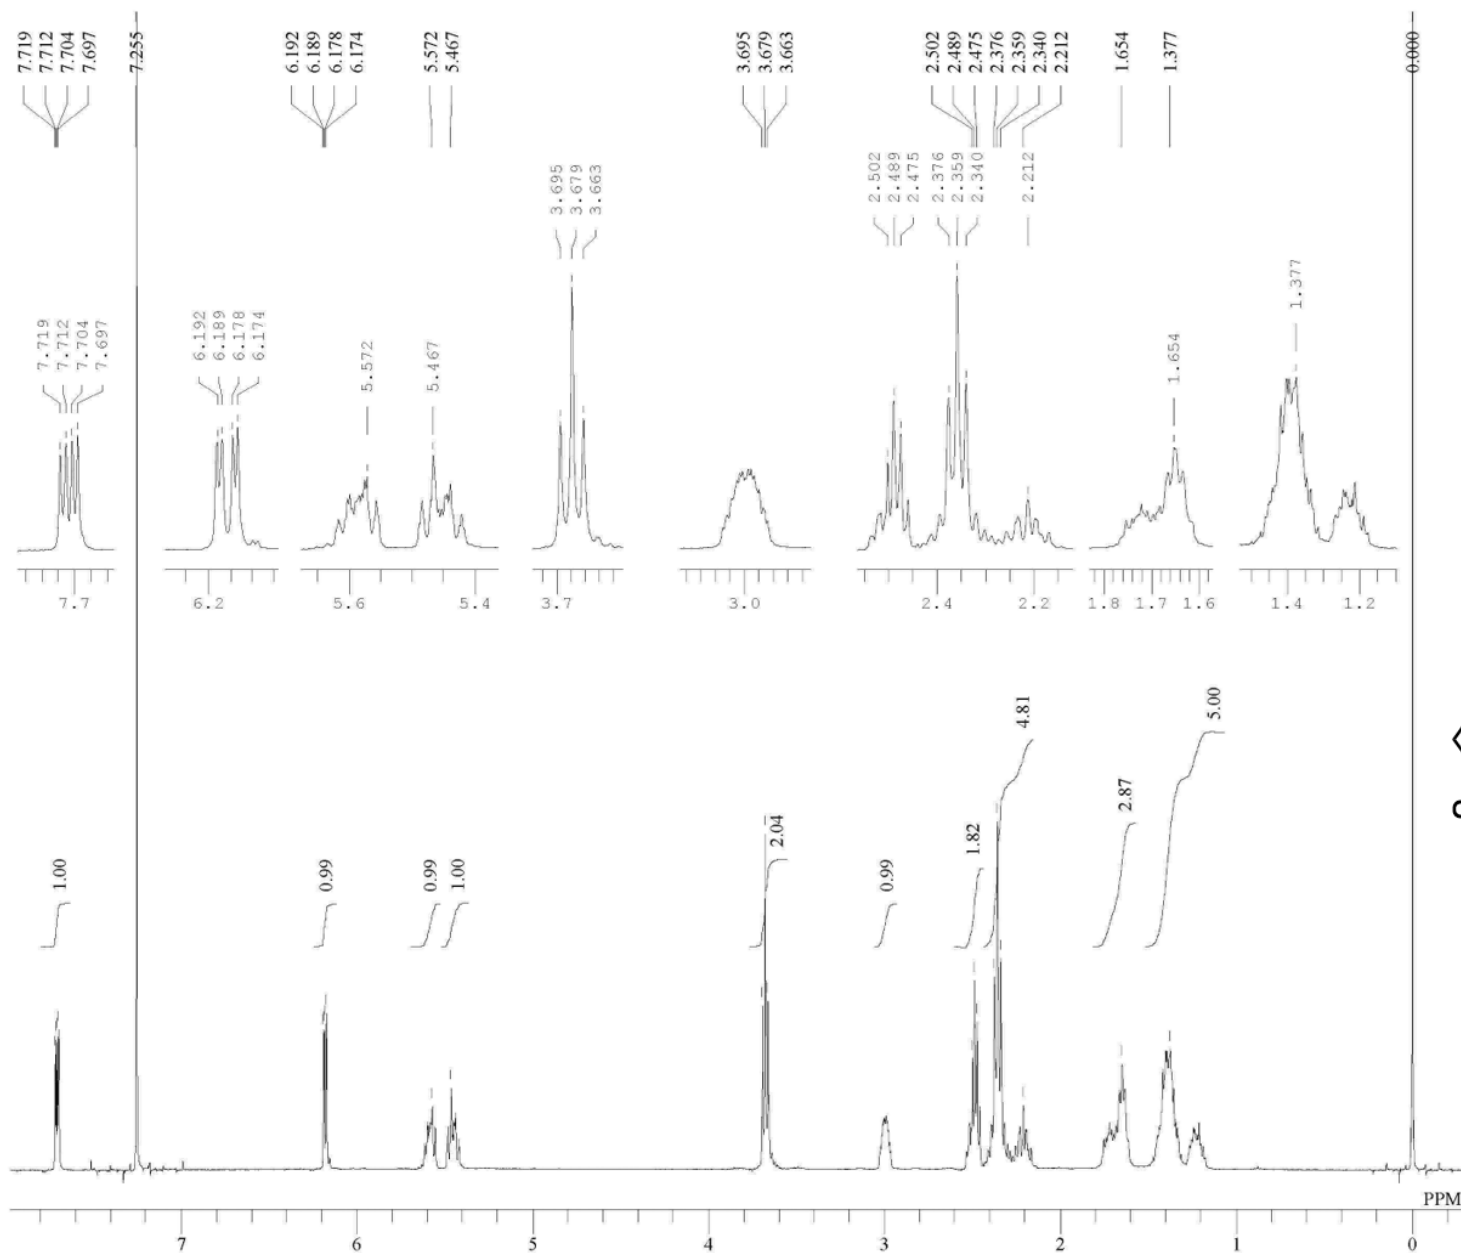

DFILE 16OHdn cisOPDA\_2-1.jdf  
 COMNT single\_pulse  
 DATIM 02-12-2020 15:21:01  
 OBNUC 1H  
 EXMOD proton.jxp  
 OBFRQ 399.78 MHz  
 OBSET 4.19 KHz  
 OBFIN 7.29 Hz  
 POINT 16400  
 FREQU 7503.00 Hz  
 SCANS 128  
 ACQTM 2.1837 sec  
 PD 5.0000 sec  
 PW1 2.95 usec  
 IRNUC 1H  
 CTEMP 23.7 c  
 SLVNT CDCL3  
 EXREF 0.00 ppm  
 BF 0.25 Hz  
 RGAIN 62

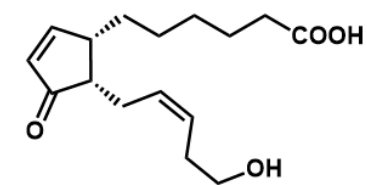

16OH-dn-*cis*-OPDA (**6**)

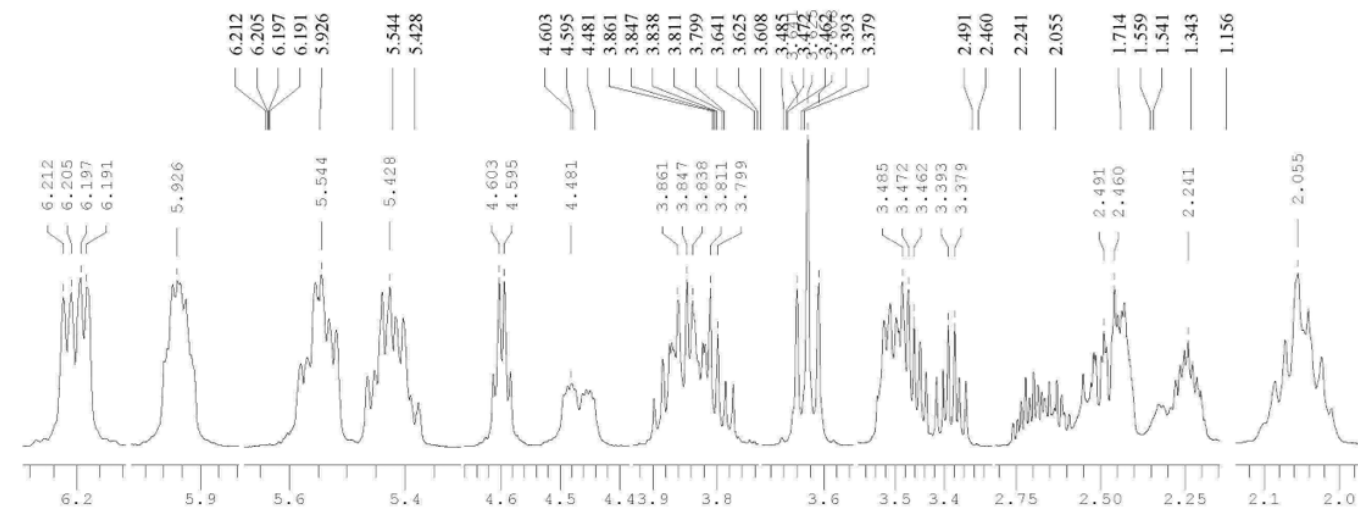

DFILE TBAF\_1H-1.jdf  
 COMNT single\_pulse  
 DATIM 01-09-2020 11:28:10  
 OBNUC 1H  
 EXMOD proton.jxp  
 OBFRQ 399.78 MHz  
 OBSET 4.19 KHz  
 OBFIN 7.29 Hz  
 POINT 16400  
 FREQU 7503.00 Hz  
 SCANS 8  
 ACQTM 2.1837 sec  
 PD 5.0000 sec  
 PW1 2.95 usec  
 IRNUC 1H  
 CTEMP 22.5 c  
 SLVNT CDCL3  
 EXREF 0.00 ppm  
 BF 0.25 Hz  
 RGAIN 40

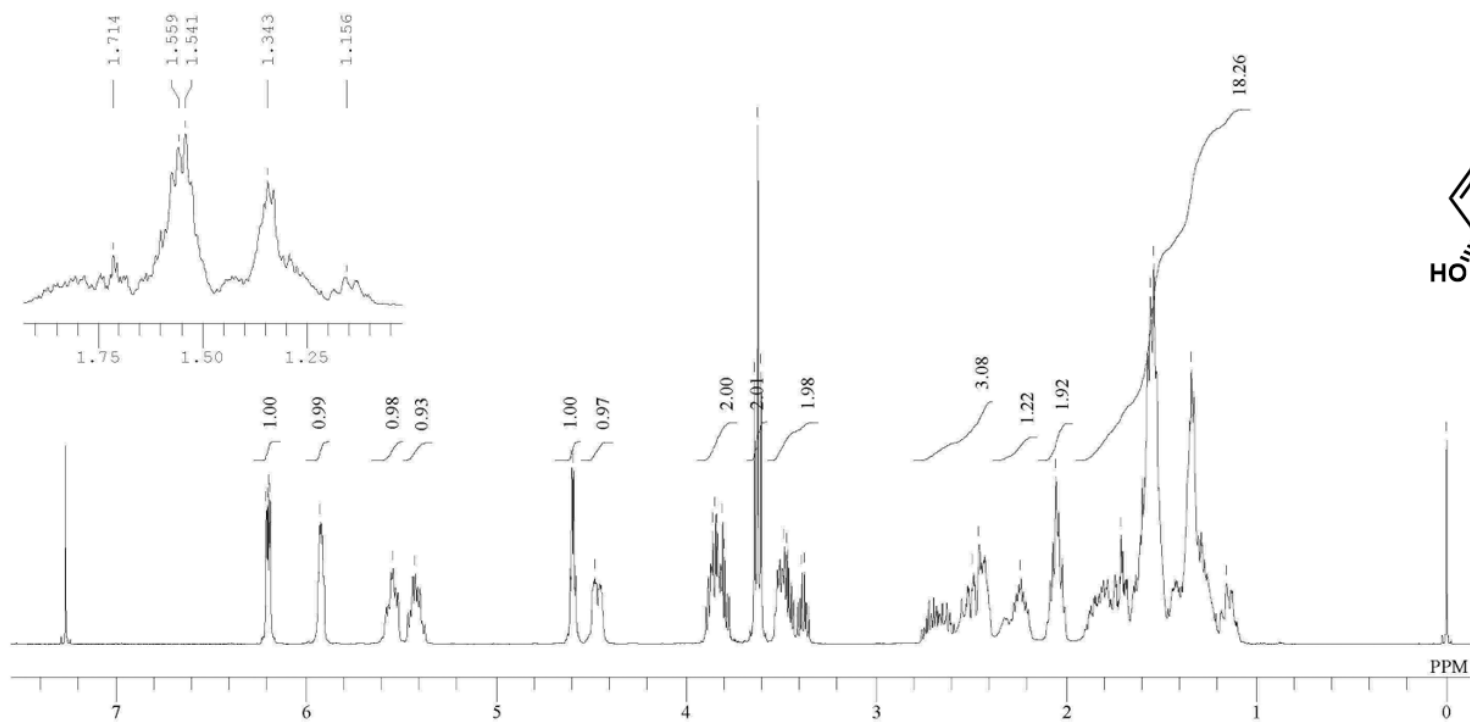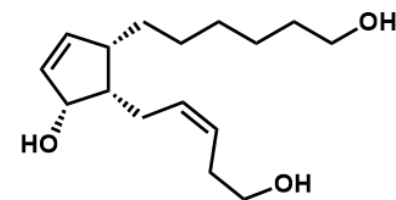

**23**



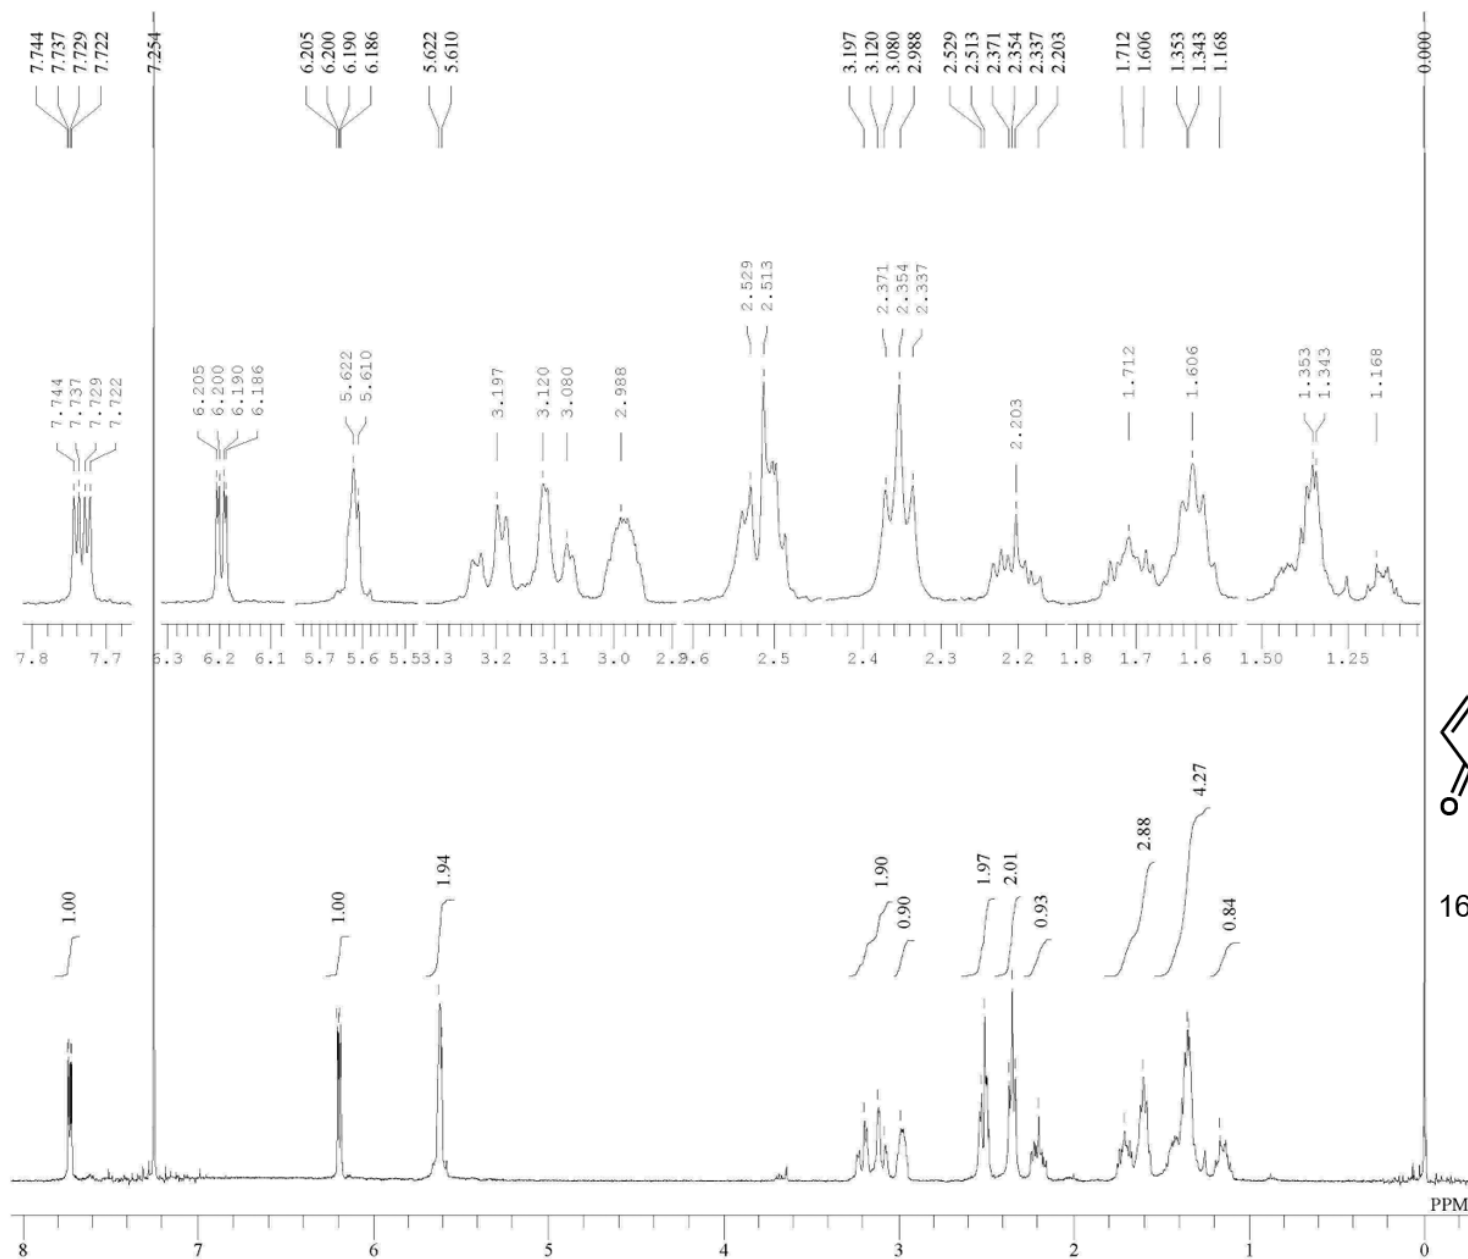

DFILE 07179ahple-1.jdf  
 COMNT single\_pulse  
 DATIM 28-11-2020 17:05:06  
 OBNUC 1H  
 EXMOD proton.jxp  
 OBFRQ 399.78 MHz  
 OBSET 4.19 KHz  
 OBFIN 7.29 Hz  
 POINT 16400  
 FREQU 7503.00 Hz  
 SCANS 8  
 ACQTM 2.1837 sec  
 PD 5.0000 sec  
 PW1 2.95 usec  
 IRNUC 1H  
 CTEMP 25.8 c  
 SLVNT CDCL3  
 EXREF 0.00 ppm  
 BF 0.25 Hz  
 RGAIN 58

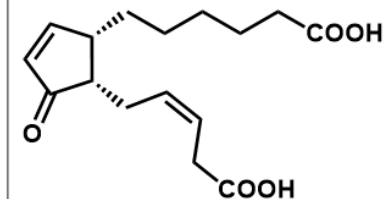

16-COOH-dn-cis-OPDA (7)

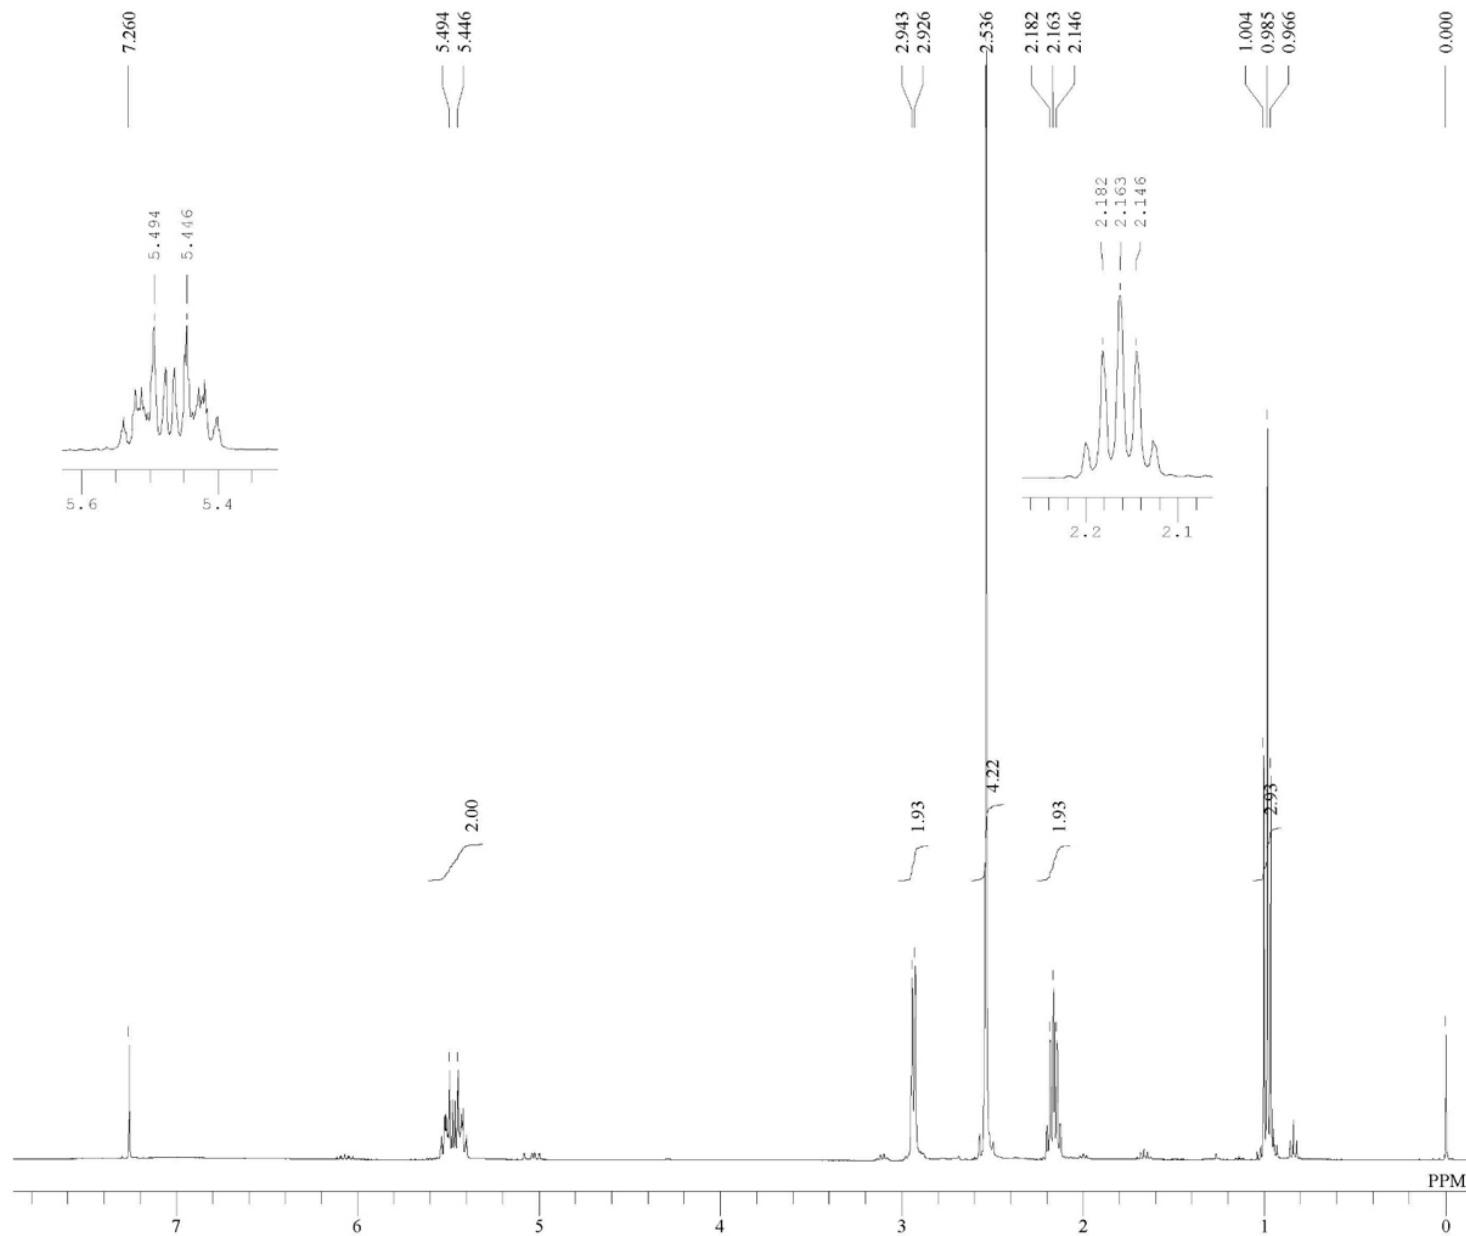

DFILE 27target\_Proton-1-1.jdf  
 COMNT single\_pulse  
 DATIM 19-08-2020 19:37:00  
 OBNUC 1H  
 EXMOD proton.jxp  
 OBFRQ 399.78 MHz  
 OBSET 4.19 KHz  
 OBFIN 7.29 Hz  
 POINT 16400  
 FREQU 7503.00 Hz  
 SCANS 8  
 ACQTM 2.1837 sec  
 PD 5.0000 sec  
 PW1 2.95 usec  
 IRNUC 1H  
 CTEMP 21.6 c  
 SLVNT CDCL3  
 EXREF 0.00 ppm  
 BF 0.25 Hz  
 RGAIN 46

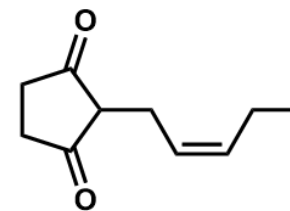

**27**

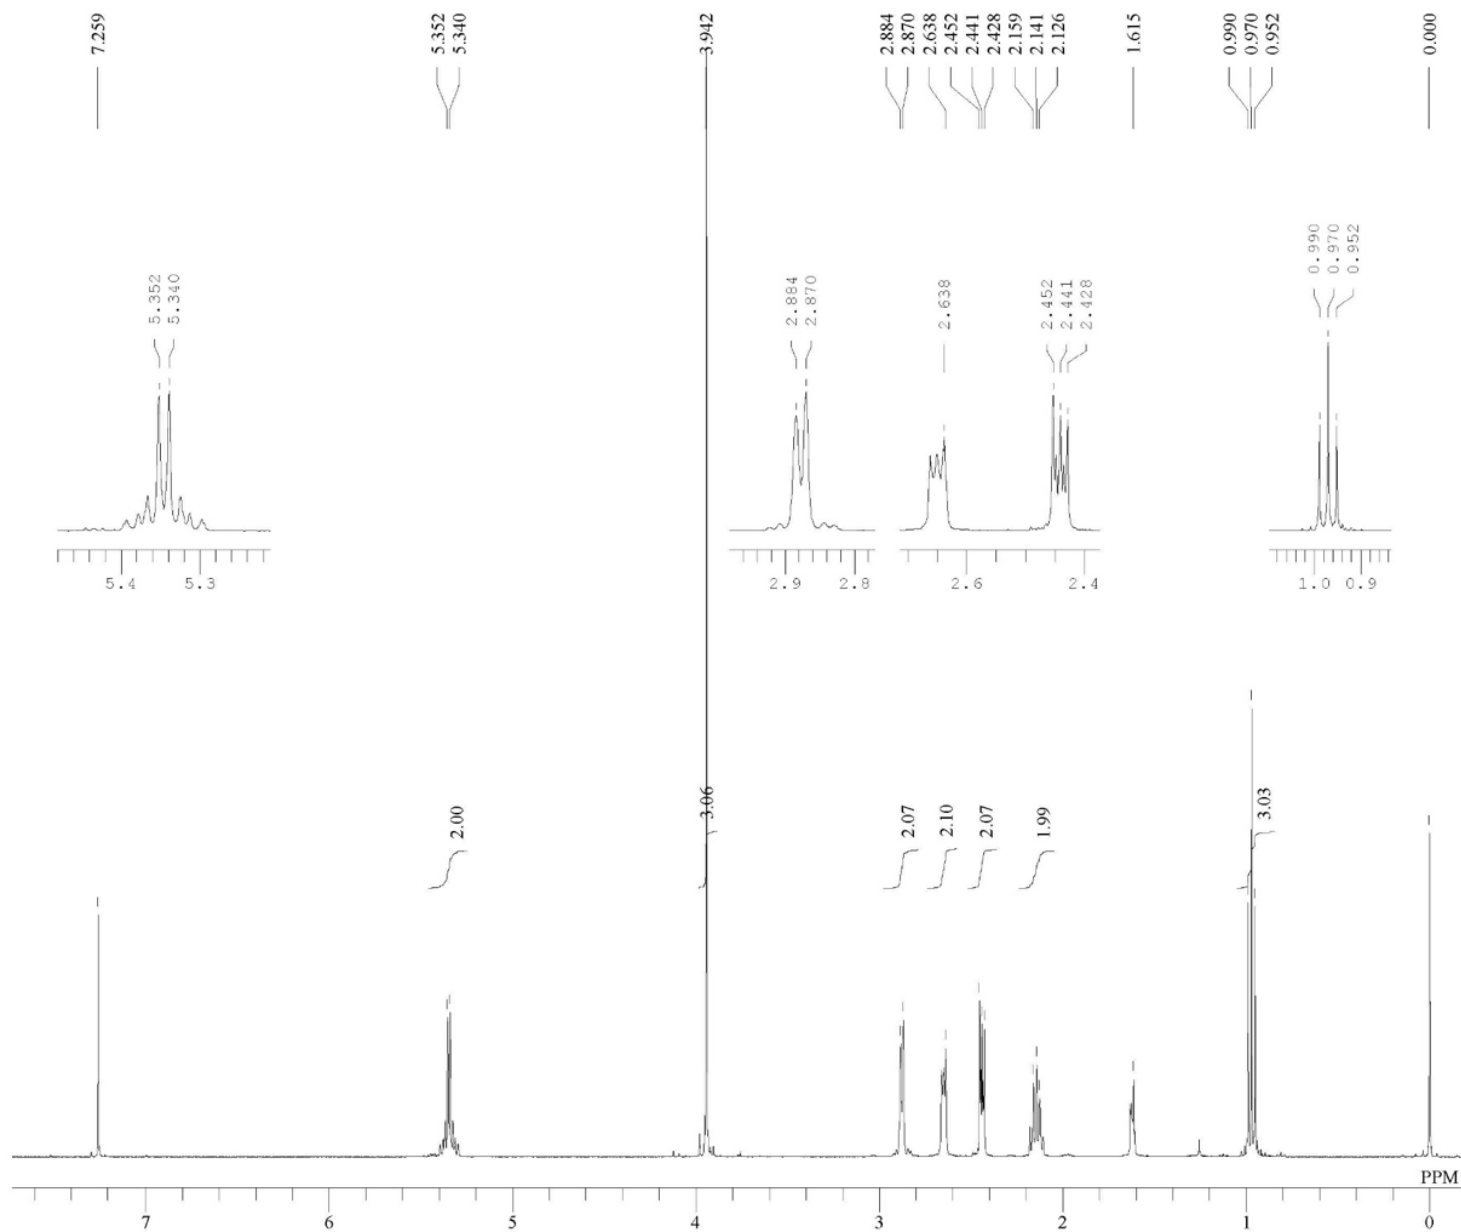

DFILE 28 Proton-1-1.jdf  
 COMNT single\_pulse  
 DATIM 27-08-2020 12:00:01  
 OBNUC 1H  
 EXMOD proton.jxp  
 OBFREQ 399.78 MHz  
 OBSET 4.19 KHz  
 OBFIN 7.29 Hz  
 POINT 16400  
 FREQU 7503.00 Hz  
 SCANS 8  
 ACQTM 2.1837 sec  
 PD 5.0000 sec  
 PW1 2.95 usec  
 IRNUC 1H  
 CTEMP 22.3 c  
 SLVNT CDCL3  
 EXREF 0.00 ppm  
 BF 0.25 Hz  
 RGAIN 58

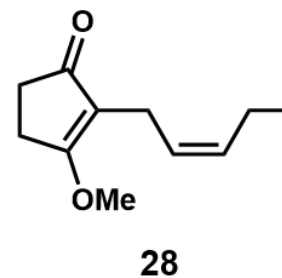

DFILE 30 target Proton-1-1.jdf  
 COMNT single\_pulse  
 DATIM 30-07-2020 17:28:15  
 OBNUC 1H  
 EXMOD proton.jxp  
 OBFRQ 399.78 MHz  
 OBSET 4.19 KHz  
 OBFIN 7.29 Hz  
 POINT 16400  
 FREQU 7503.00 Hz  
 SCANS 8  
 ACQTM 2.1837 sec  
 PD 5.0000 sec  
 PW1 2.95 usec  
 IRNUC 1H  
 CTEMP 24.3 c  
 SLVNT CDCL3  
 EXREF 0.00 ppm  
 BF 0.25 Hz  
 RGAIN 50

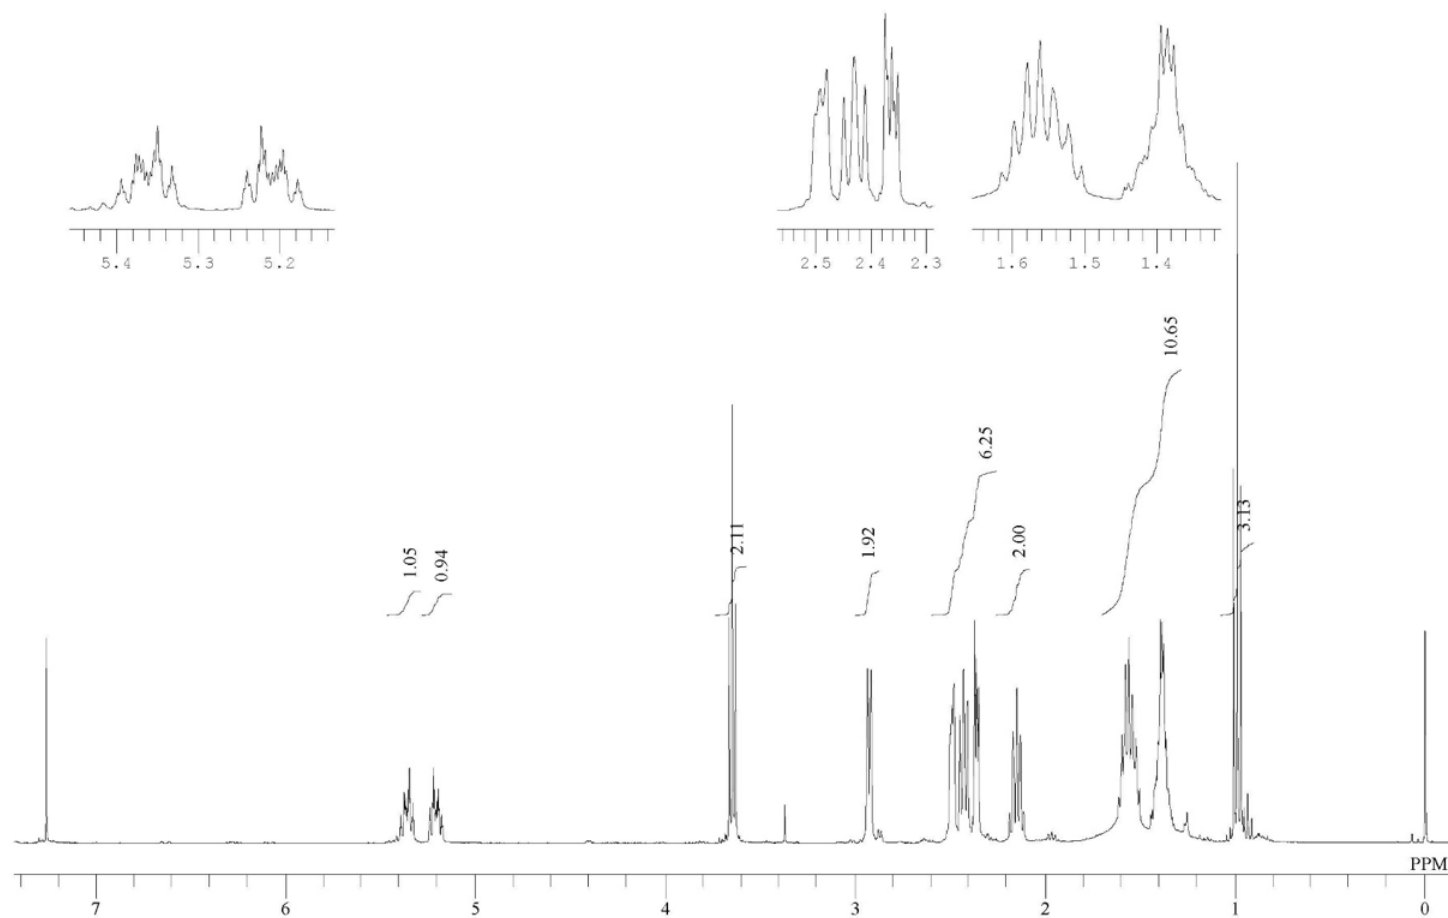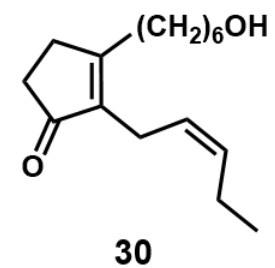

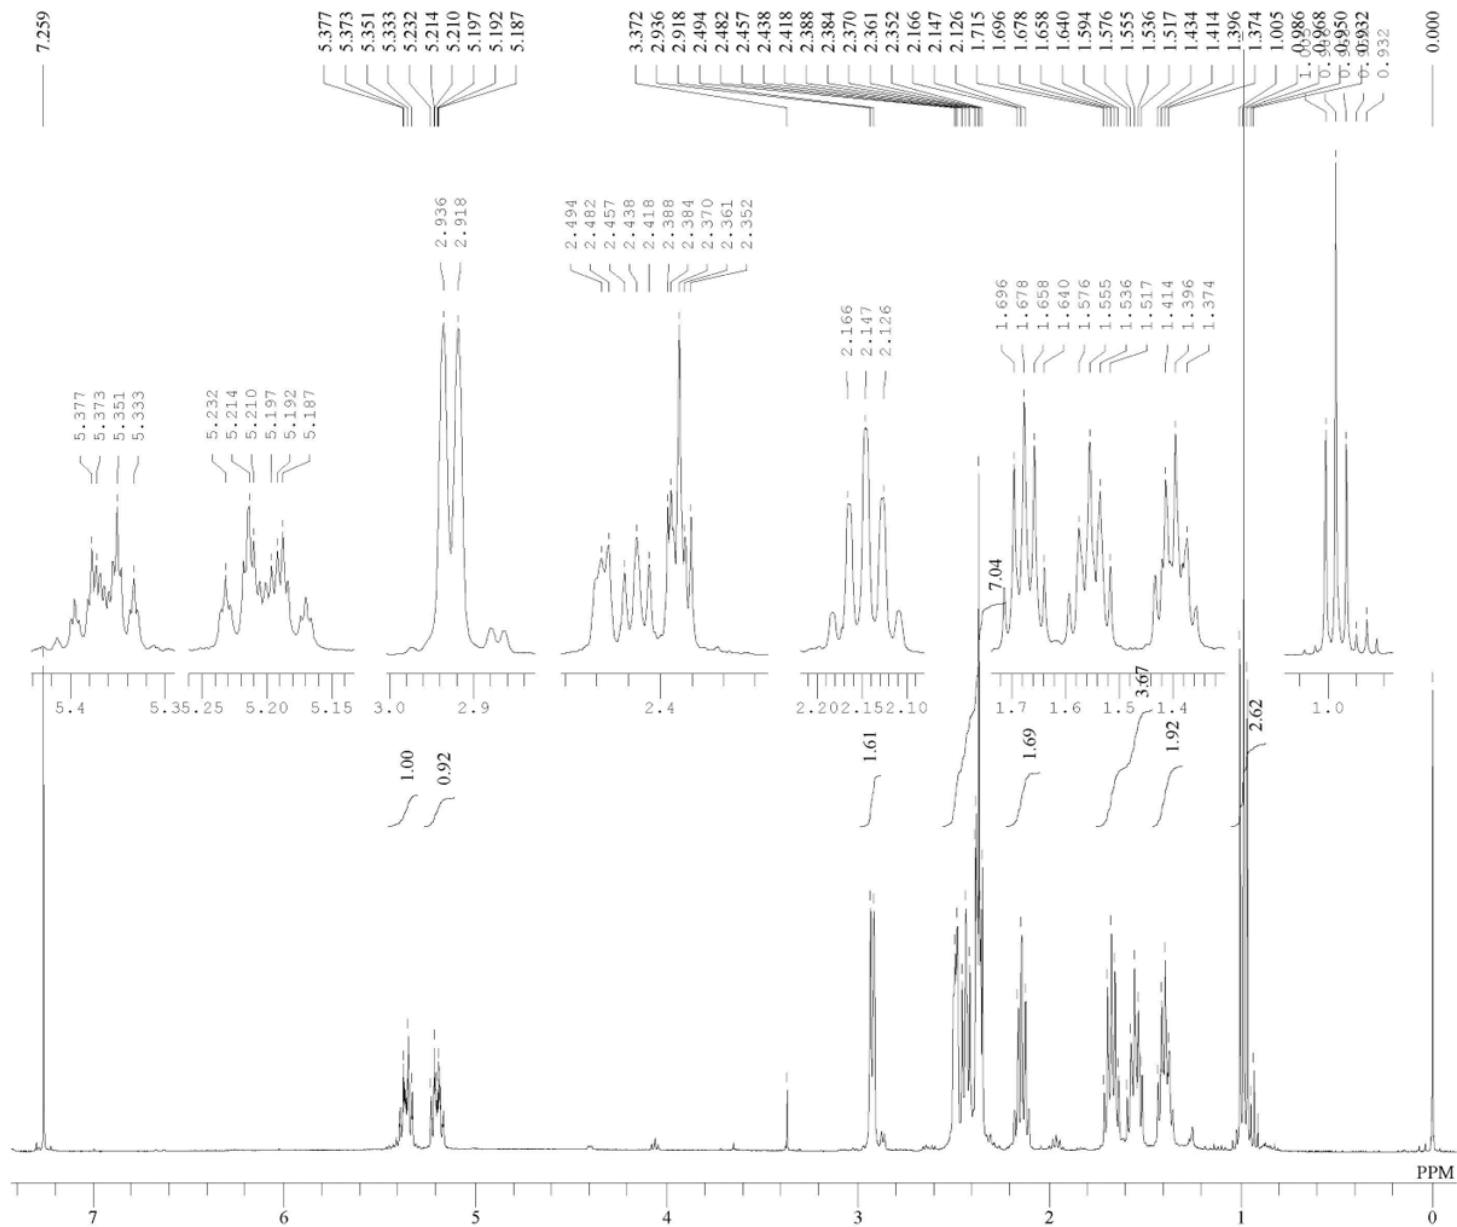

DFILE 5\_Proton-1-1.jdf  
 COMNT single\_pulse  
 DATIM 31-07-2020 18:49:15  
 OBNUC 1H  
 EXMOD proton.jxp  
 OBFRQ 399.78 MHz  
 OBSET 4.19 KHz  
 OBFIN 7.29 Hz  
 POINT 16400  
 FREQU 7503.00 Hz  
 SCANS 8  
 ACQTM 2.1837 sec  
 PD 5.0000 sec  
 PW1 2.95 usec  
 IRNUC 1H  
 CTEMP 24.3 c  
 SLVNT CDCL3  
 EXREF 0.00 ppm  
 BF 0.25 Hz  
 RGAIN 54

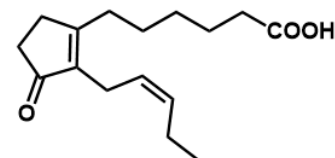

dn-iso-OPDA (5)

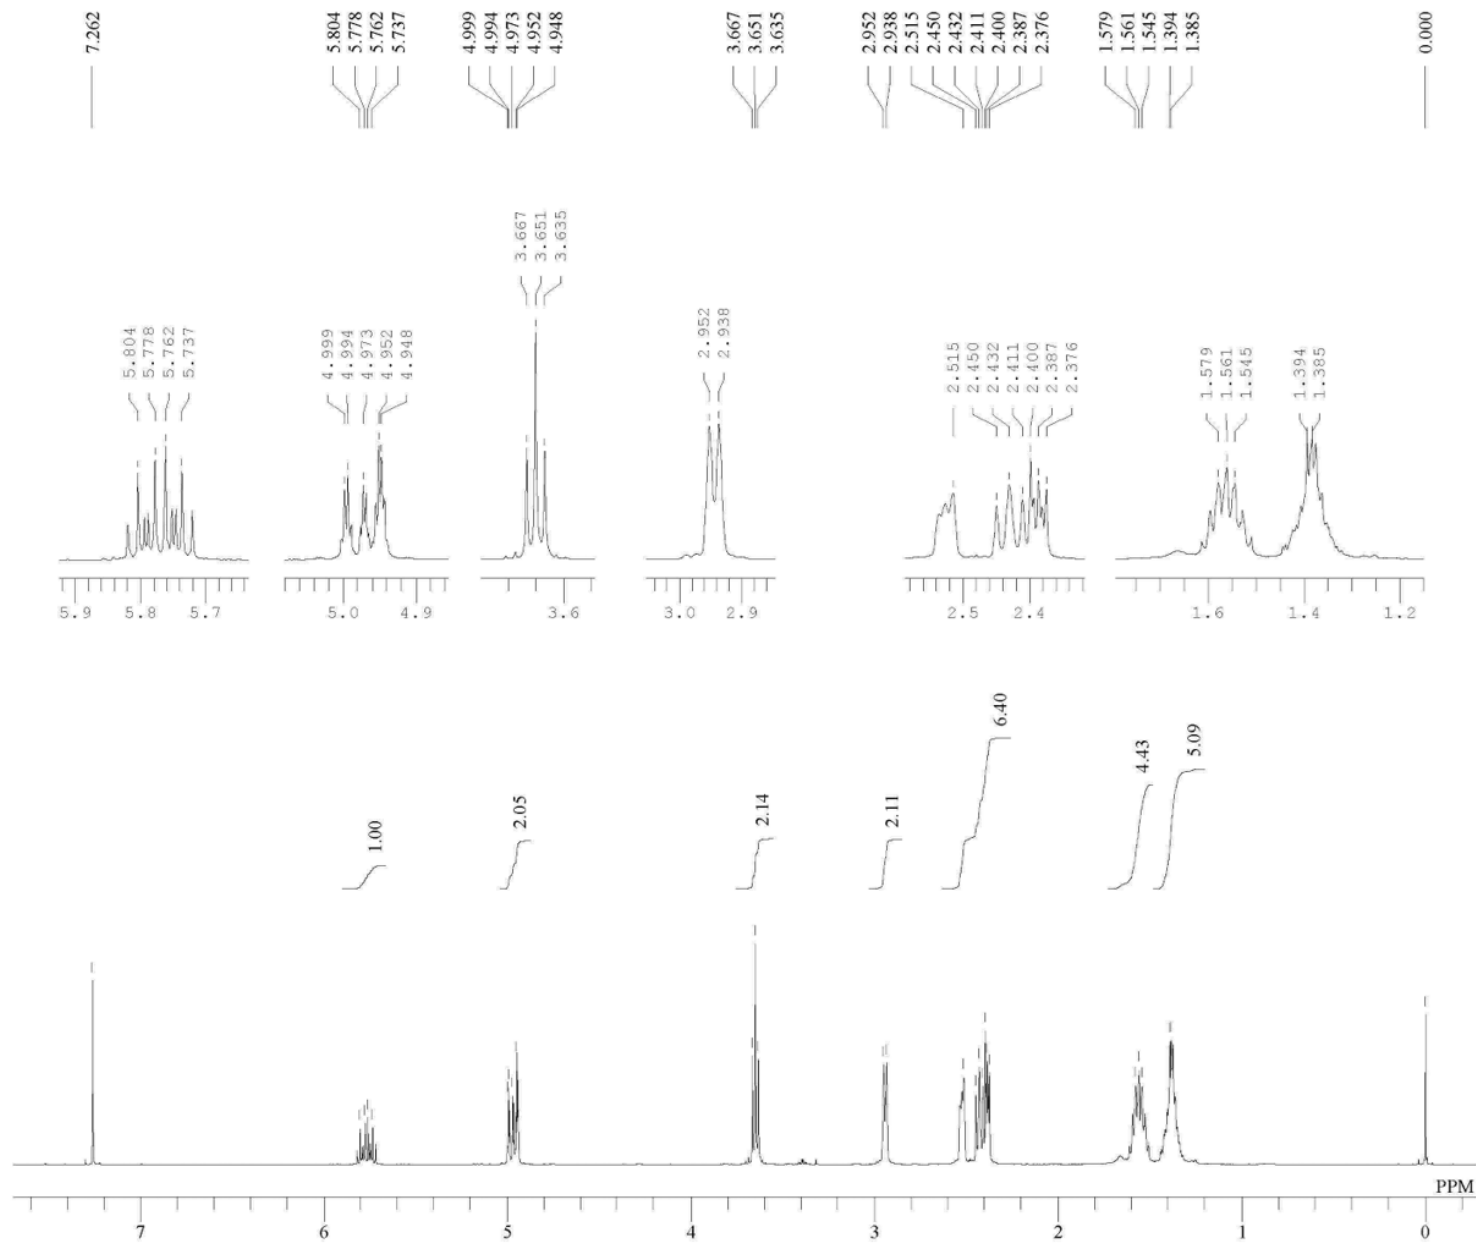

DFILE 33 fOfŠjfff [fC\_Proton-2-1.jdt  
 COMNT single\_pulse  
 DATIM 17-11-2020 20:07:47  
 OBNUC 1H  
 EXMOD proton.jxp  
 OBFRQ 399.78 MHz  
 OBSET 4.19 KHz  
 OBFIN 7.29 Hz  
 POINT 16400  
 FREQU 7503.00 Hz  
 SCANS 8  
 ACQTM 2.1837 sec  
 PD 5.0000 sec  
 PW1 2.95 usec  
 IRNUC 1H  
 CTEMP 21.9 c  
 SLVNT CDCL3  
 EXREF 0.00 ppm  
 BF 0.25 Hz  
 RGAIN 50

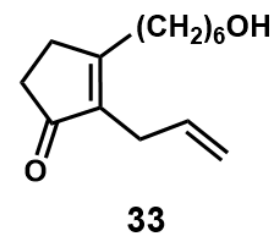

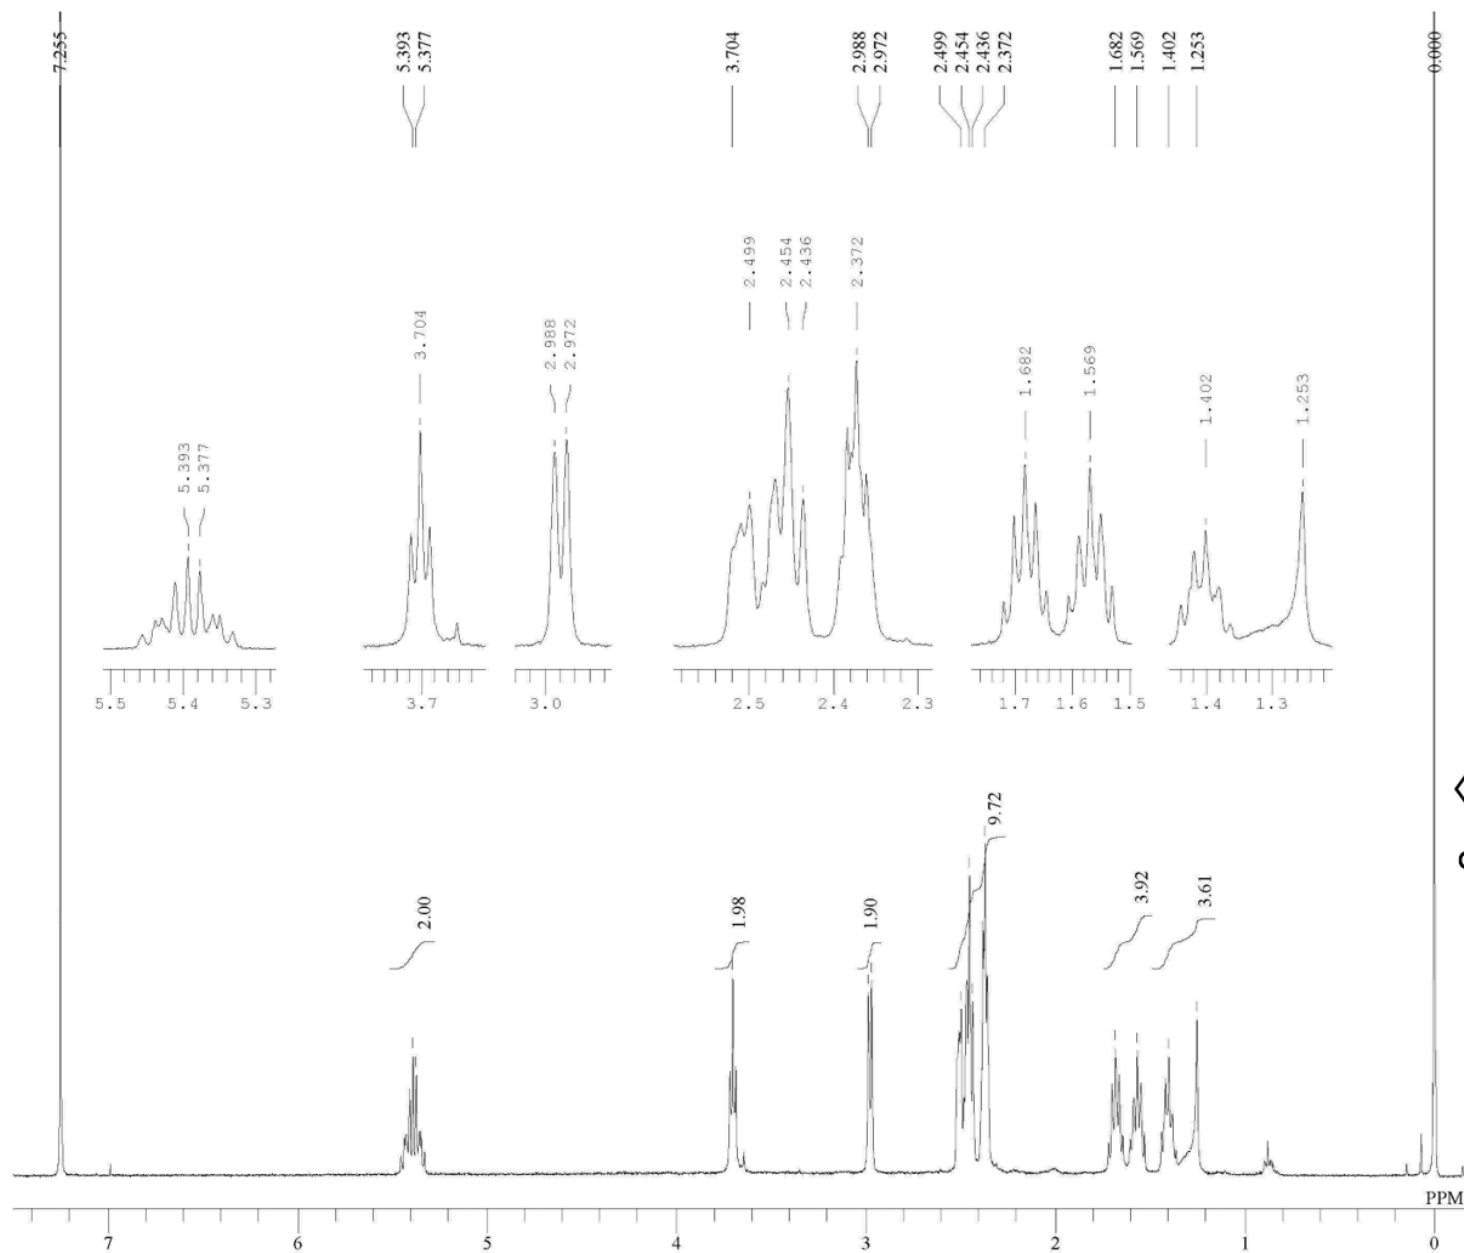

DFILE 16OHdnisoOPDA-1.jdf  
 COMNT single\_pulse  
 DATIM 03-12-2020 12:41:48  
 OBNUC 1H  
 EXMOD proton.jxp  
 OBFRQ 399.78 MHz  
 OBSET 4.19 KHz  
 OBFIN 7.29 Hz  
 POINT 16400  
 FREQU 7503.00 Hz  
 SCANS 8  
 ACQTM 2.1837 sec  
 PD 5.0000 sec  
 PW1 2.95 usec  
 IRNUC 1H  
 CTEMP 22.0 c  
 SLVNT CDCL3  
 EXREF 0.00 ppm  
 BF 0.25 Hz  
 RGAIN 50

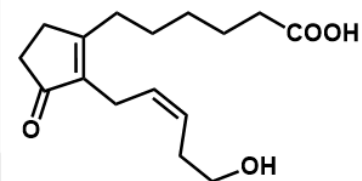

16-OH-dn-iso-OPDA (8)

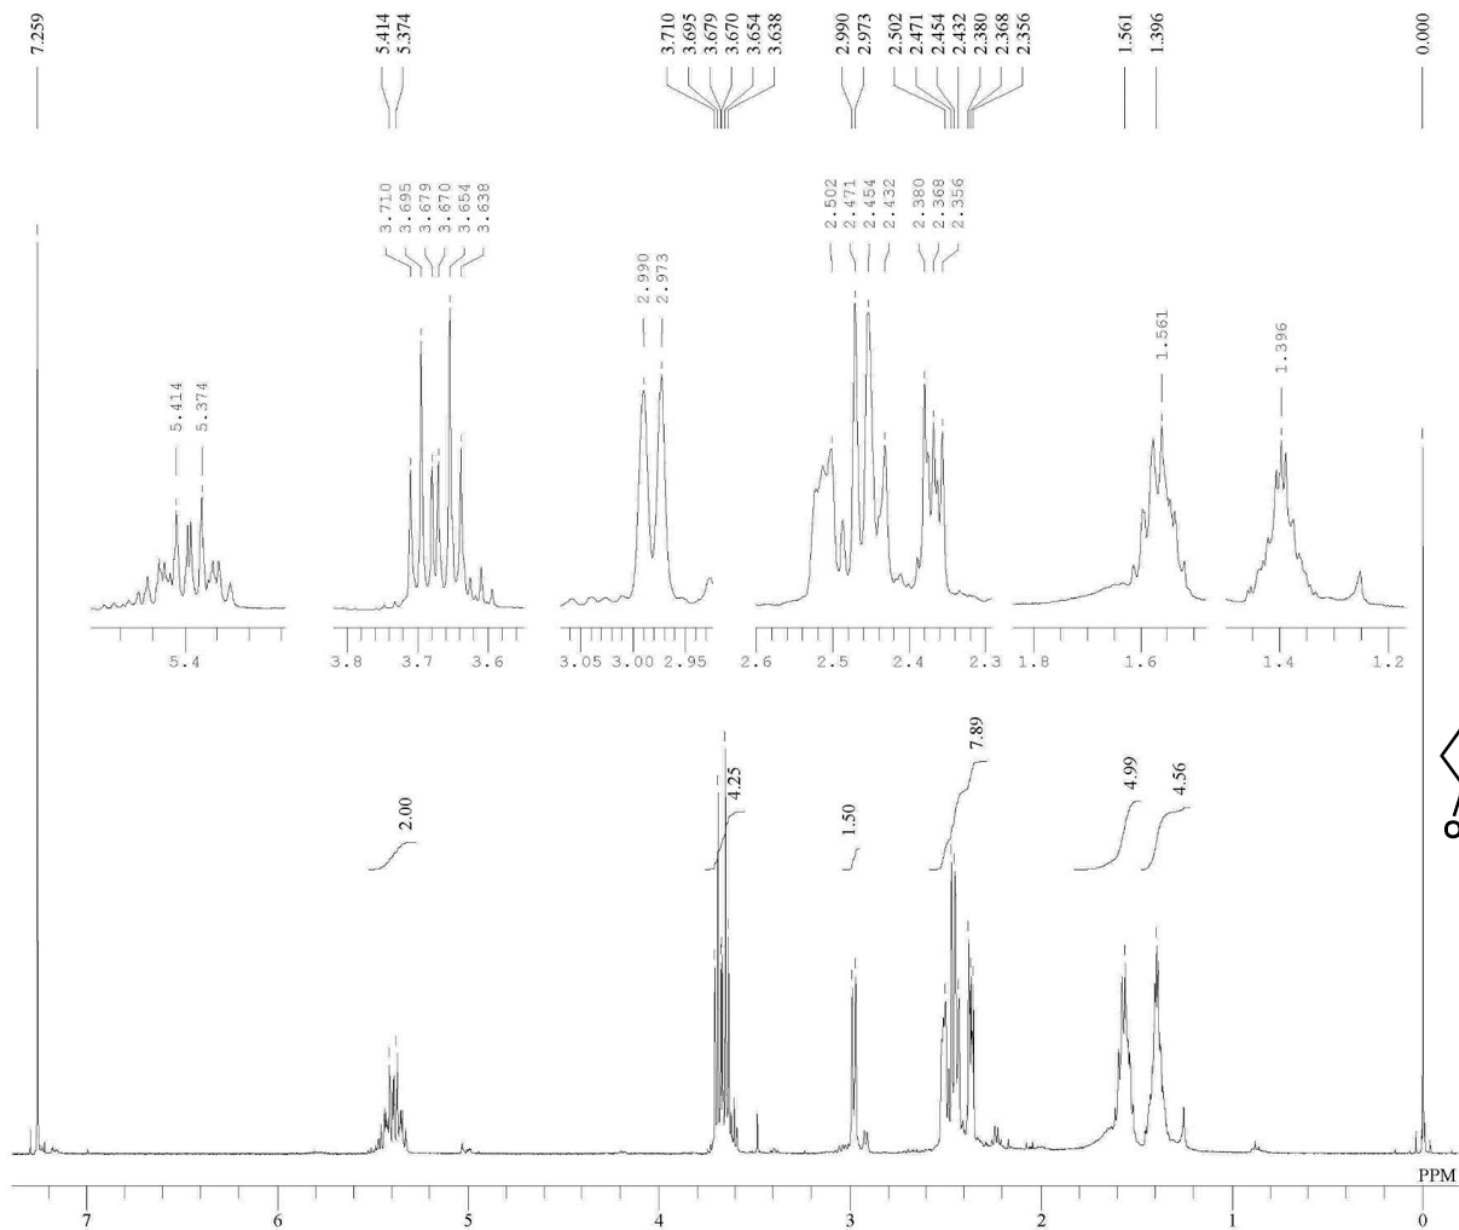

DFILE 35 fWfqfhf fL.fV2OH\_Proton  
 COMNT single\_pulse  
 DATIM 10-11-2020 17:15:42  
 OBNUC 1H  
 EXMOD proton.jxp  
 OBFRQ 399.78 MHz  
 OBSET 4.19 KHz  
 OBFIN 7.29 Hz  
 POINT 16400  
 FREQU 7503.00 Hz  
 SCANS 8  
 ACQTM 2.1837 sec  
 PD 5.0000 sec  
 PW1 2.95 usec  
 IRNUC 1H  
 CTEMP 21.8 c  
 SLVNT CDCL3  
 EXREF 0.00 ppm  
 BF 0.25 Hz  
 RGAIN 62

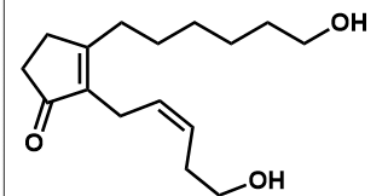

**34**



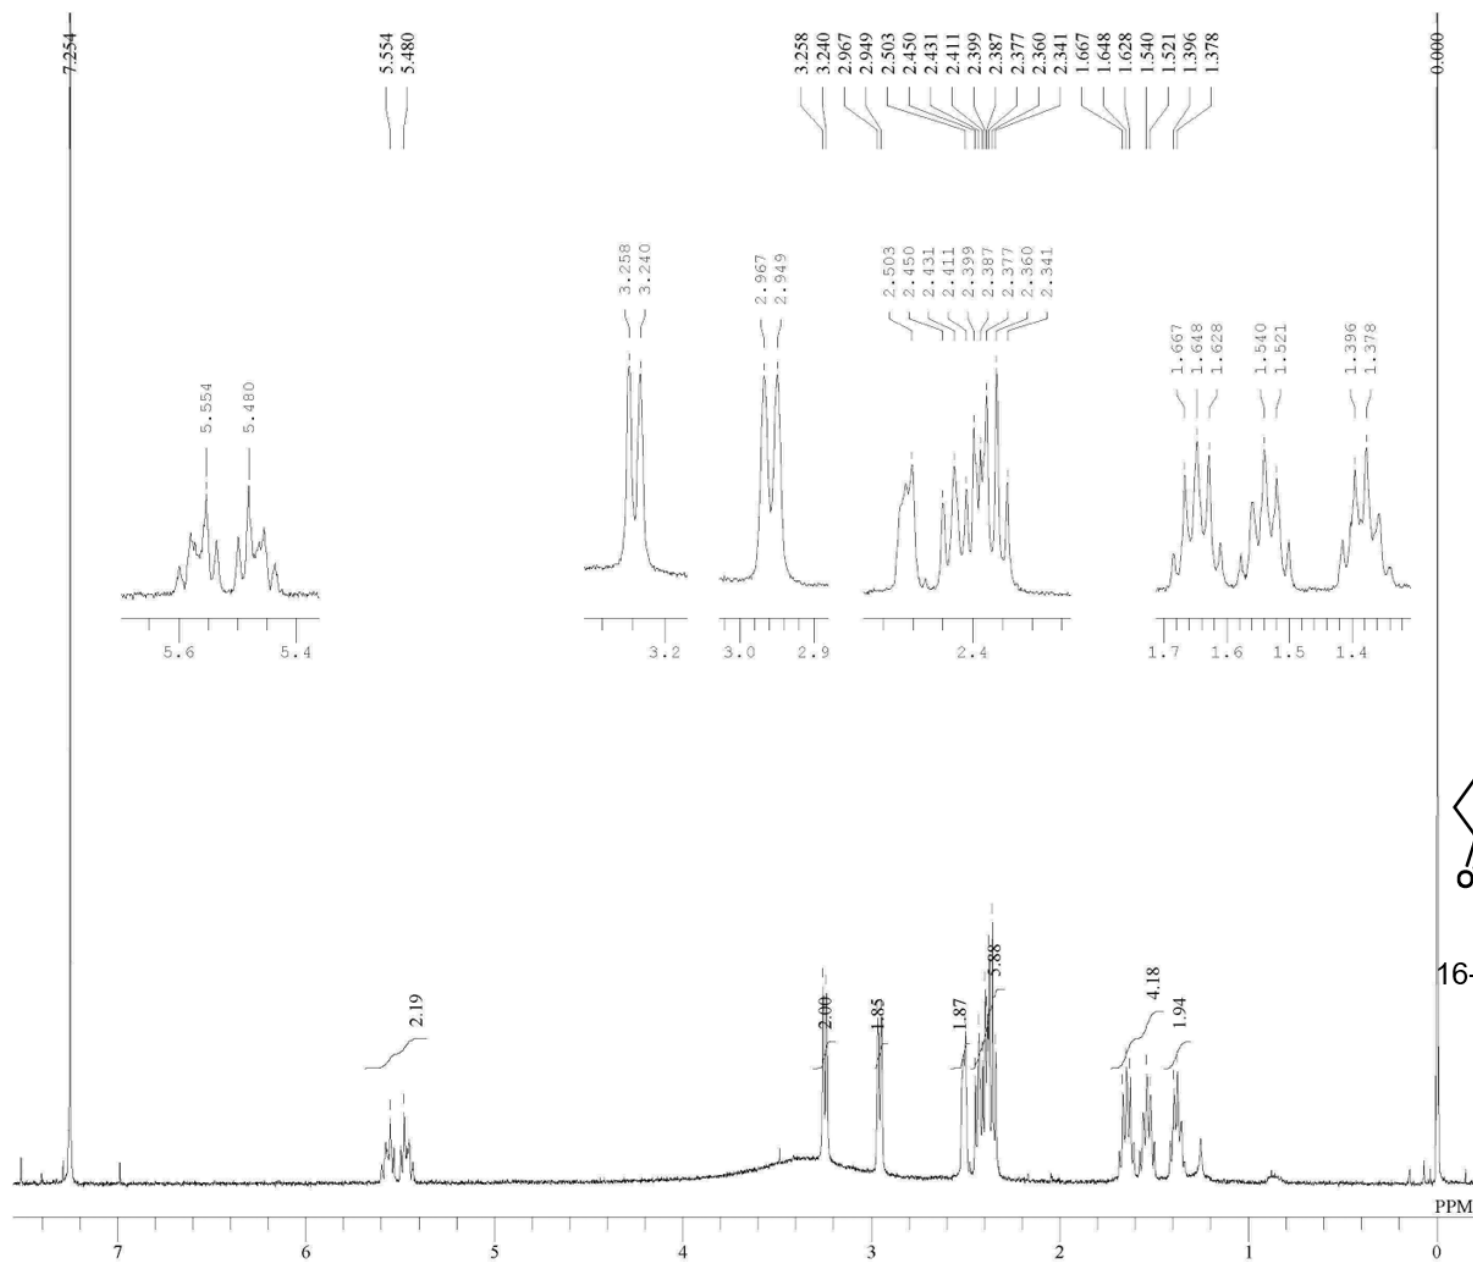

DFILE 16-COOH-dn-iso-OPDA\_Prot  
 COMNT single\_pulse  
 DATIM 27-11-2020 21:26:31  
 OBNUC 1H  
 EXMOD proton.jxp  
 OBFRQ 399.78 MHz  
 OBSET 4.19 KHz  
 OBFIN 7.29 Hz  
 POINT 16400  
 FREQU 7503.00 Hz  
 SCANS 8  
 ACQTM 2.1837 sec  
 PD 5.0000 sec  
 PW1 2.95 usec  
 IRNUC 1H  
 CTEMP 23.8 c  
 SLVNT CDCL3  
 EXREF 0.00 ppm  
 BF 0.25 Hz  
 RGAIN 66

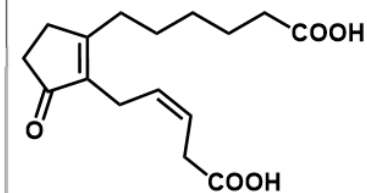

16-COOH-dn-iso-OPDA (9)

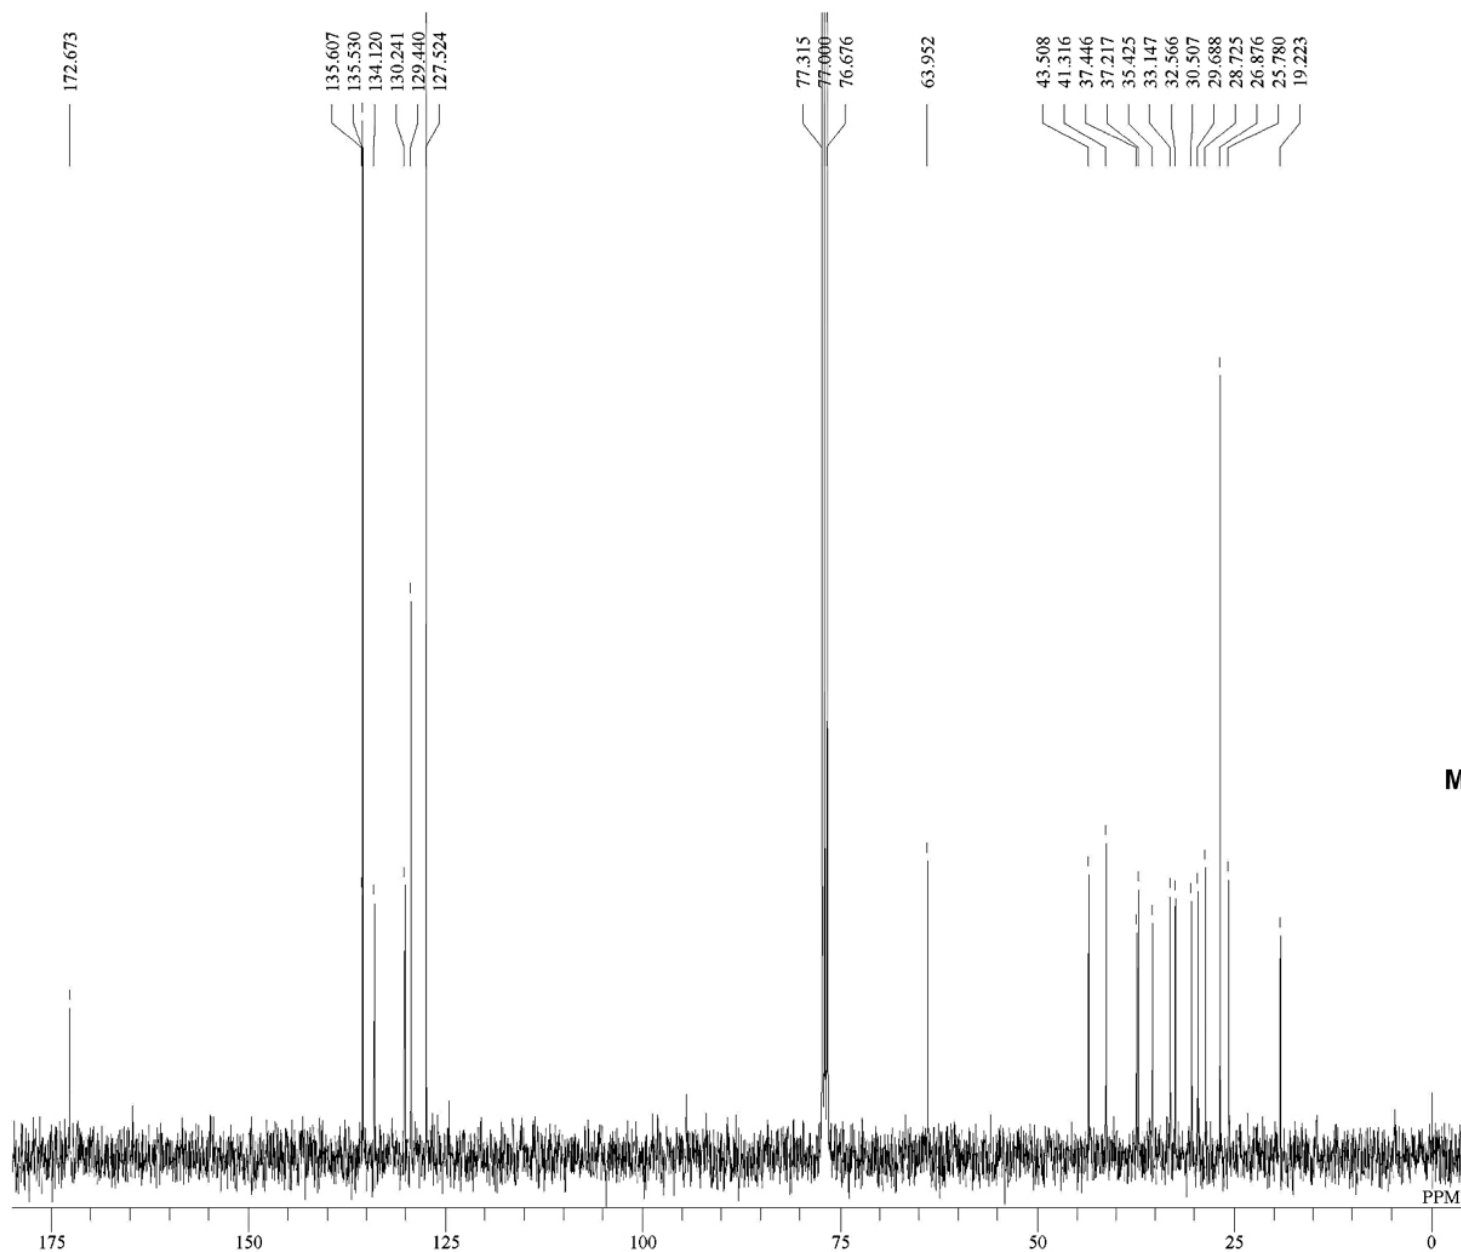

DFILE 13C\_17.jdf  
 COMNT single pulse decoupled gated N  
 DATIM 02-04-2020 17:35:19  
 OBNUC 13C  
 EXMOD carbon.jxp  
 OBFRQ 100.53 MHz  
 OBSET 5.35 KHz  
 OBFIN 5.86 Hz  
 POINT 32780  
 FREQU 31407.04 Hz  
 SCANS 190  
 ACQTM 0.0000 sec  
 PD 2.0000 sec  
 PW1 3.37 usec  
 IRNUC 1H  
 CTEMP 22.9 c  
 SLVNT CDCL3  
 EXREF 77.00 ppm  
 BF 0.25 Hz  
 RGAIN 50

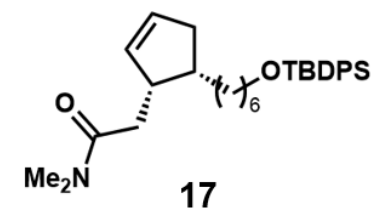

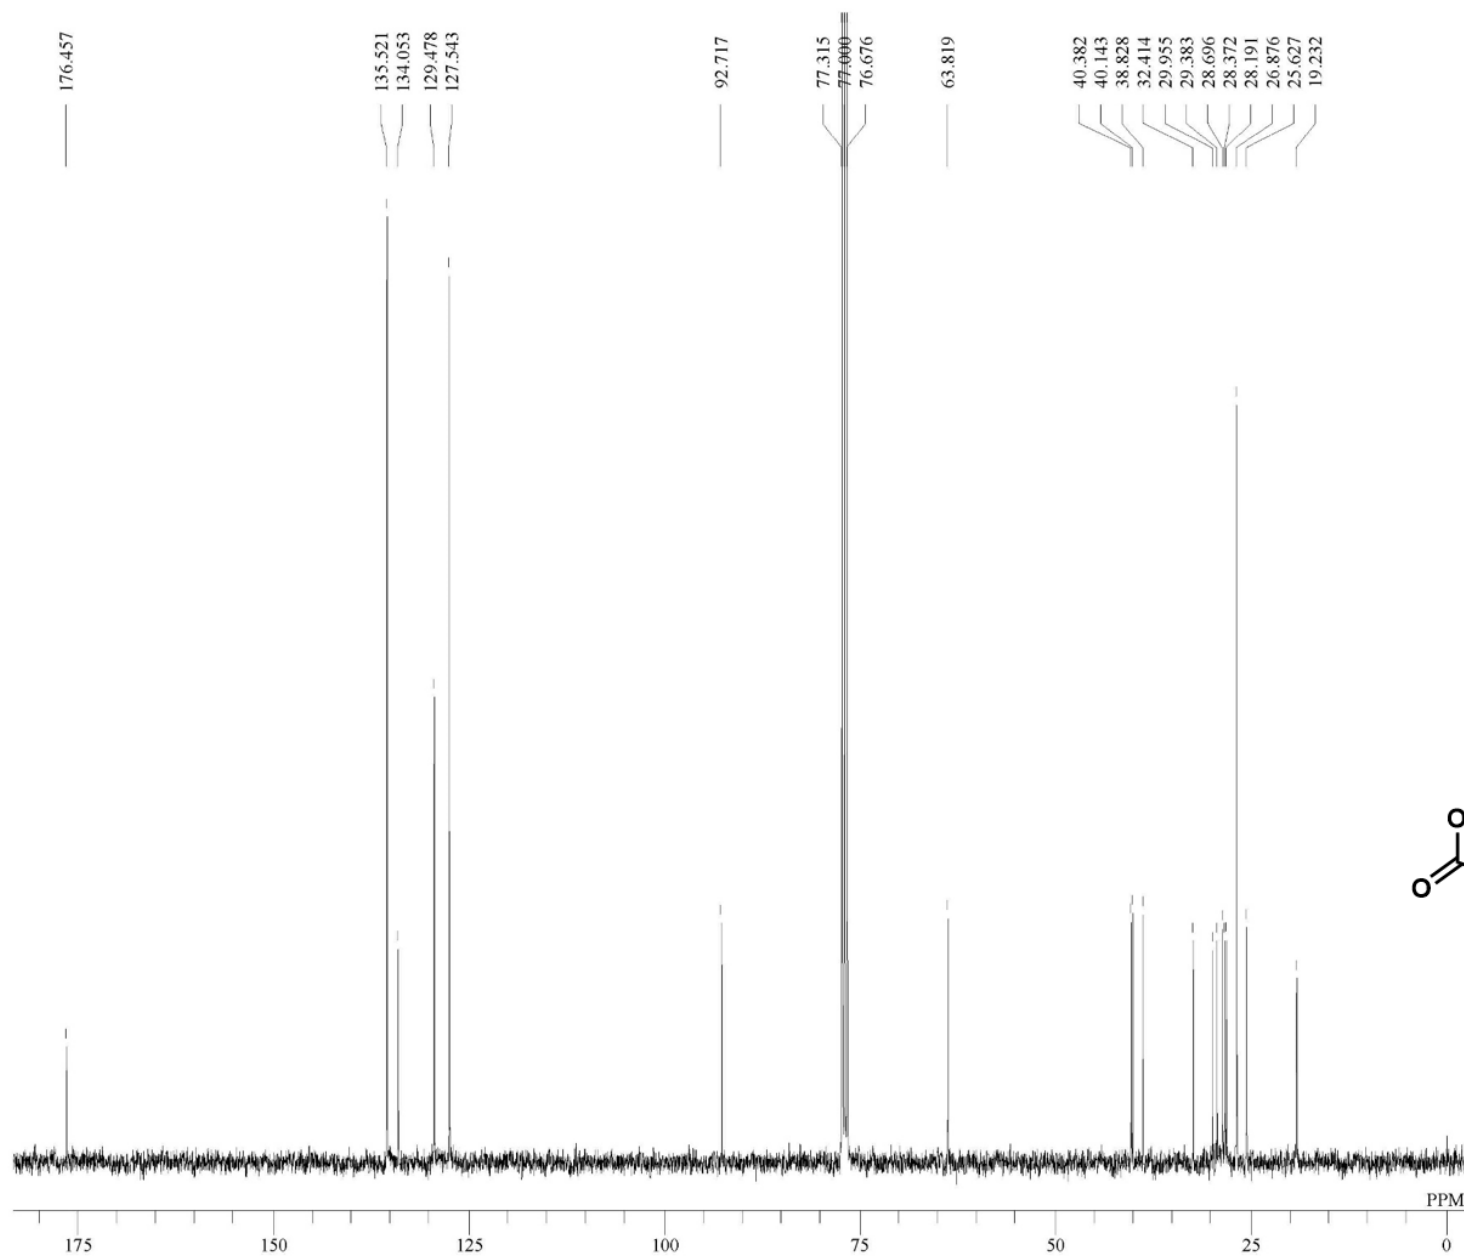

DFILE 13C-iodolactone.jdf  
 COMNT single pulse decoupled gated N  
 DATIM 03-04-2020 16:52:56  
 OBNUC 13C  
 EXMOD carbon.jxp  
 OBFRQ 100.53 MHz  
 OBSET 5.35 KHz  
 OBFIN 5.86 Hz  
 POINT 32780  
 FREQU 31407.04 Hz  
 SCANS 384  
 ACQTM 0.0000 sec  
 PD 2.0000 sec  
 PW1 3.37 usec  
 IRNUC 1H  
 CTEMP 23.5 c  
 SLVNT CDCL3  
 EXREF 77.00 ppm  
 BF 0.25 Hz  
 RGAIN 50

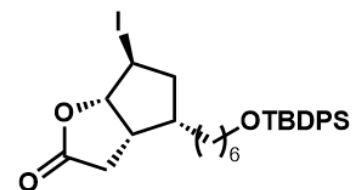



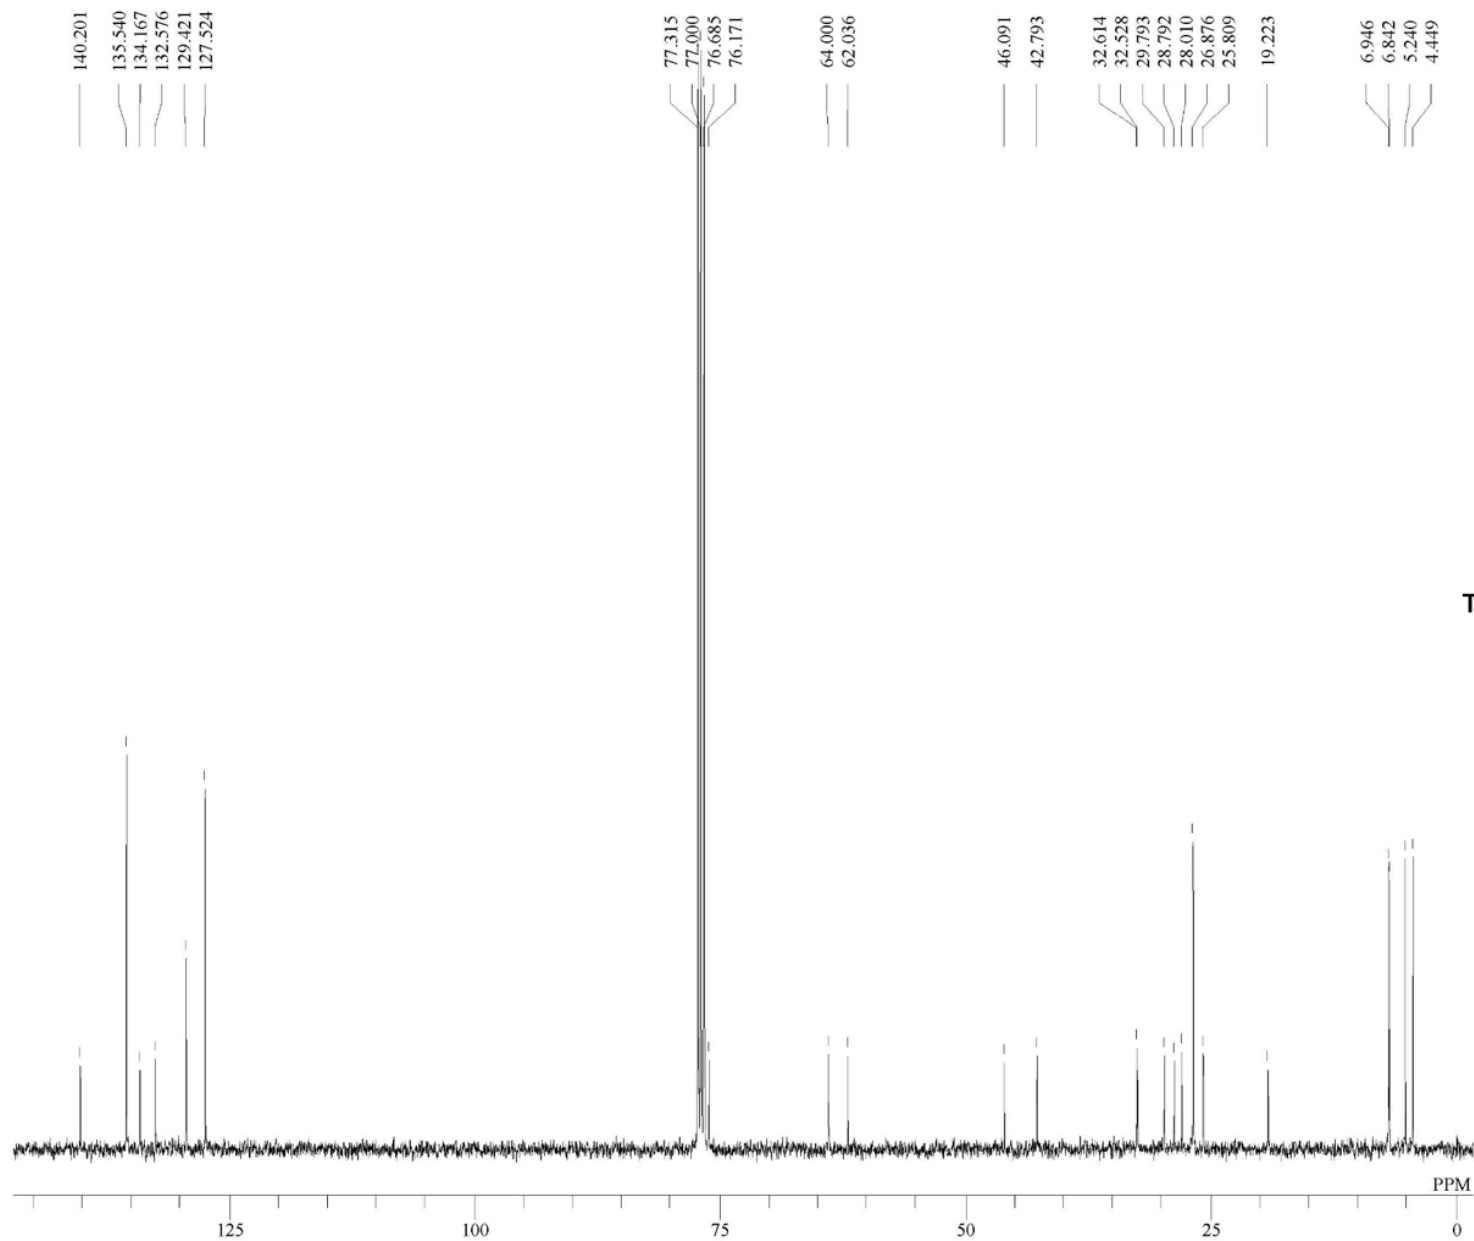

DFILE 13C\_19.jdf  
 COMNT single pulse decoupled gated N  
 DATIM 07-04-2020 17:36:05  
 OBNUC 13C  
 EXMOD carbon.jxp  
 OBFRQ 100.53 MHz  
 OBSET 5.35 KHz  
 OBFIN 5.86 Hz  
 POINT 32780  
 FREQU 31407.04 Hz  
 SCANS 523  
 ACQTM 0.0000 sec  
 PD 2.0000 sec  
 PW1 3.37 usec  
 IRNUC 1H  
 CTEMP 23.1 c  
 SLVNT CDCL3  
 EXREF 77.00 ppm  
 BF 0.25 Hz  
 RGAIN 50

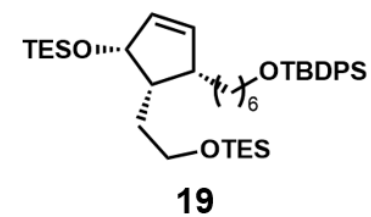

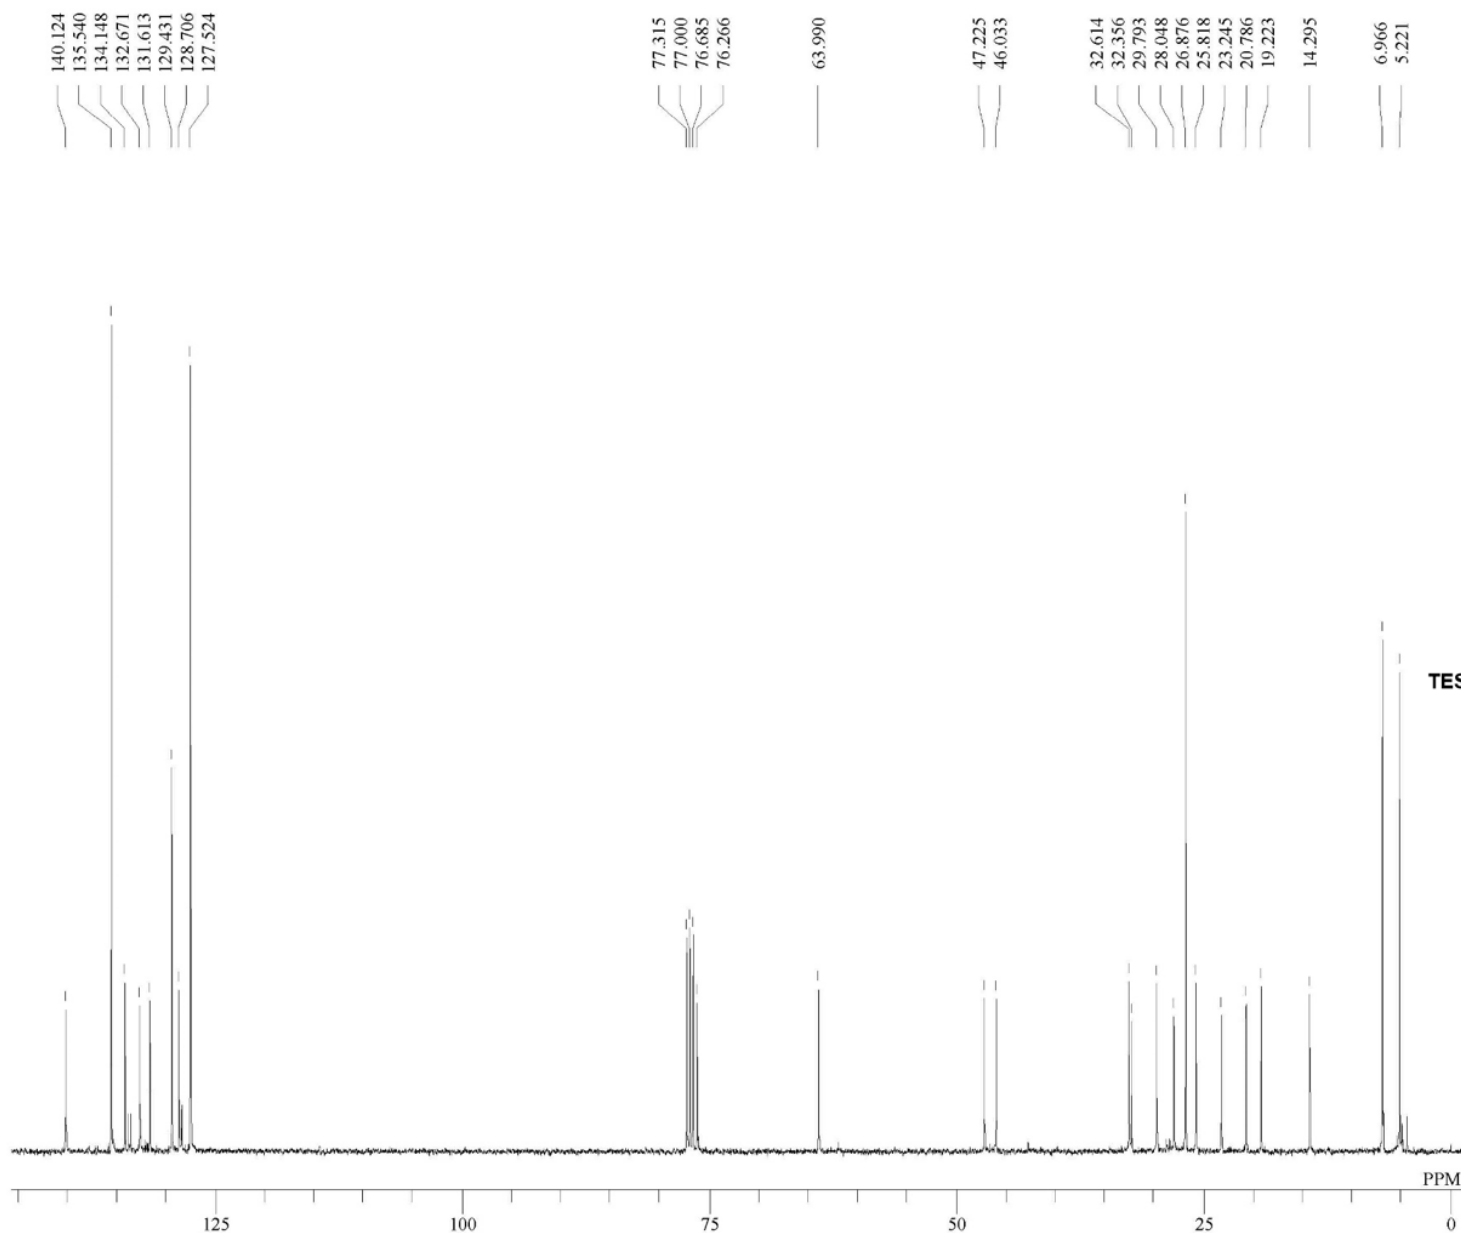

DFILE 13C\_20.jdf  
 COMNT single pulse decoupled gated N  
 DATIM 21-08-2020 19:26:09  
 OBNUC 13C  
 EXMOD carbon.jxp  
 OBFRQ 100.53 MHz  
 OBSET 5.35 KHz  
 OBFIN 5.86 Hz  
 POINT 32780  
 FREQU 31407.04 Hz  
 SCANS 327  
 ACQTM 0.0000 sec  
 PD 2.0000 sec  
 PW1 3.37 usec  
 IRNUC 1H  
 CTEMP 21.6 c  
 SLVNT CDCL3  
 EXREF 77.00 ppm  
 BF 0.25 Hz  
 RGAIN 50

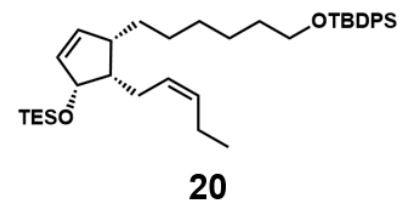

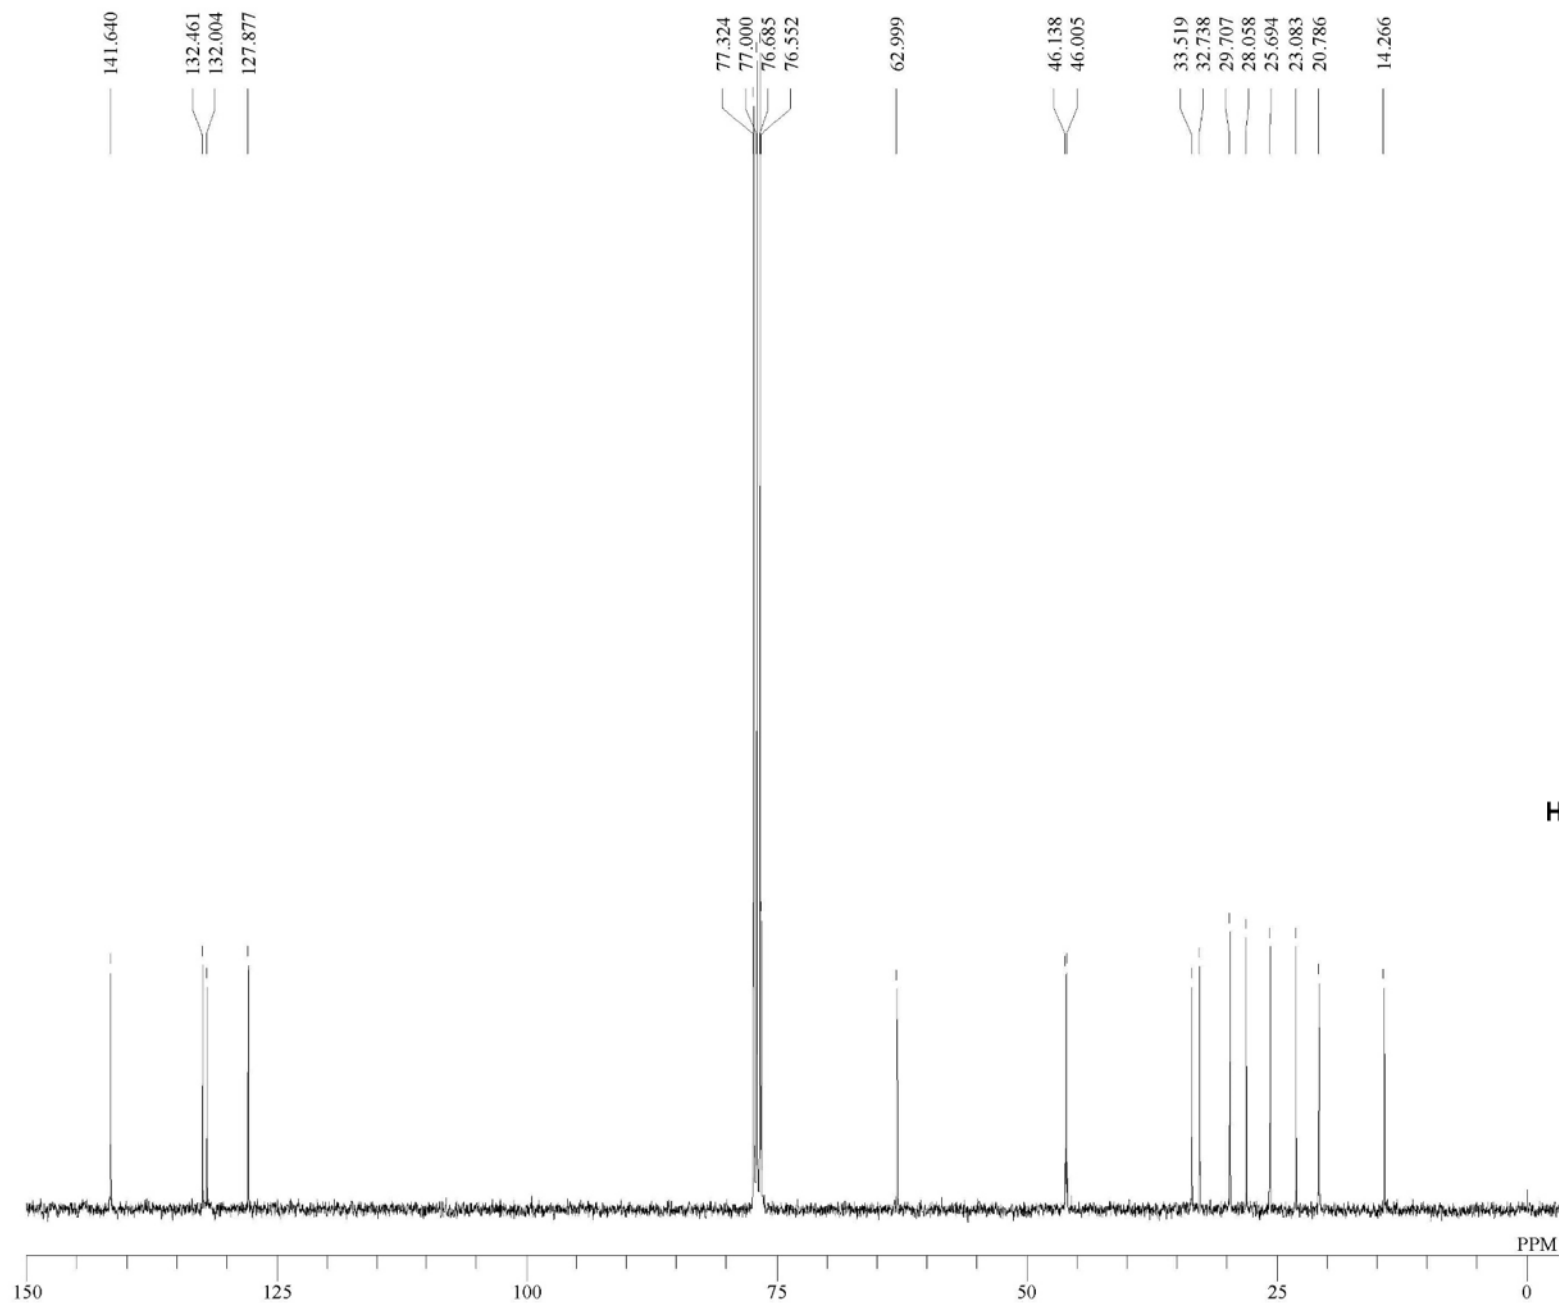

DFILE 13C\_diol.jdf  
 COMNT single pulse decoupled gated N  
 DATIM 23-08-2020 20:31:09  
 OBNUC 13C  
 EXMOD carbon.jxp  
 OBFRQ 100.53 MHz  
 OBSET 5.35 KHz  
 OBFIN 5.86 Hz  
 POINT 32780  
 FREQU 31407.04 Hz  
 SCANS 741  
 ACQTM 0.0000 sec  
 PD 2.0000 sec  
 PW1 3.37 usec  
 IRNUC 1H  
 CTEMP 21.7 c  
 SLVNT CDCL3  
 EXREF 77.00 ppm  
 BF 0.25 Hz  
 RGAIN 50

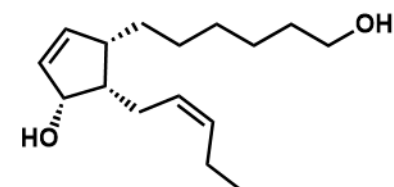

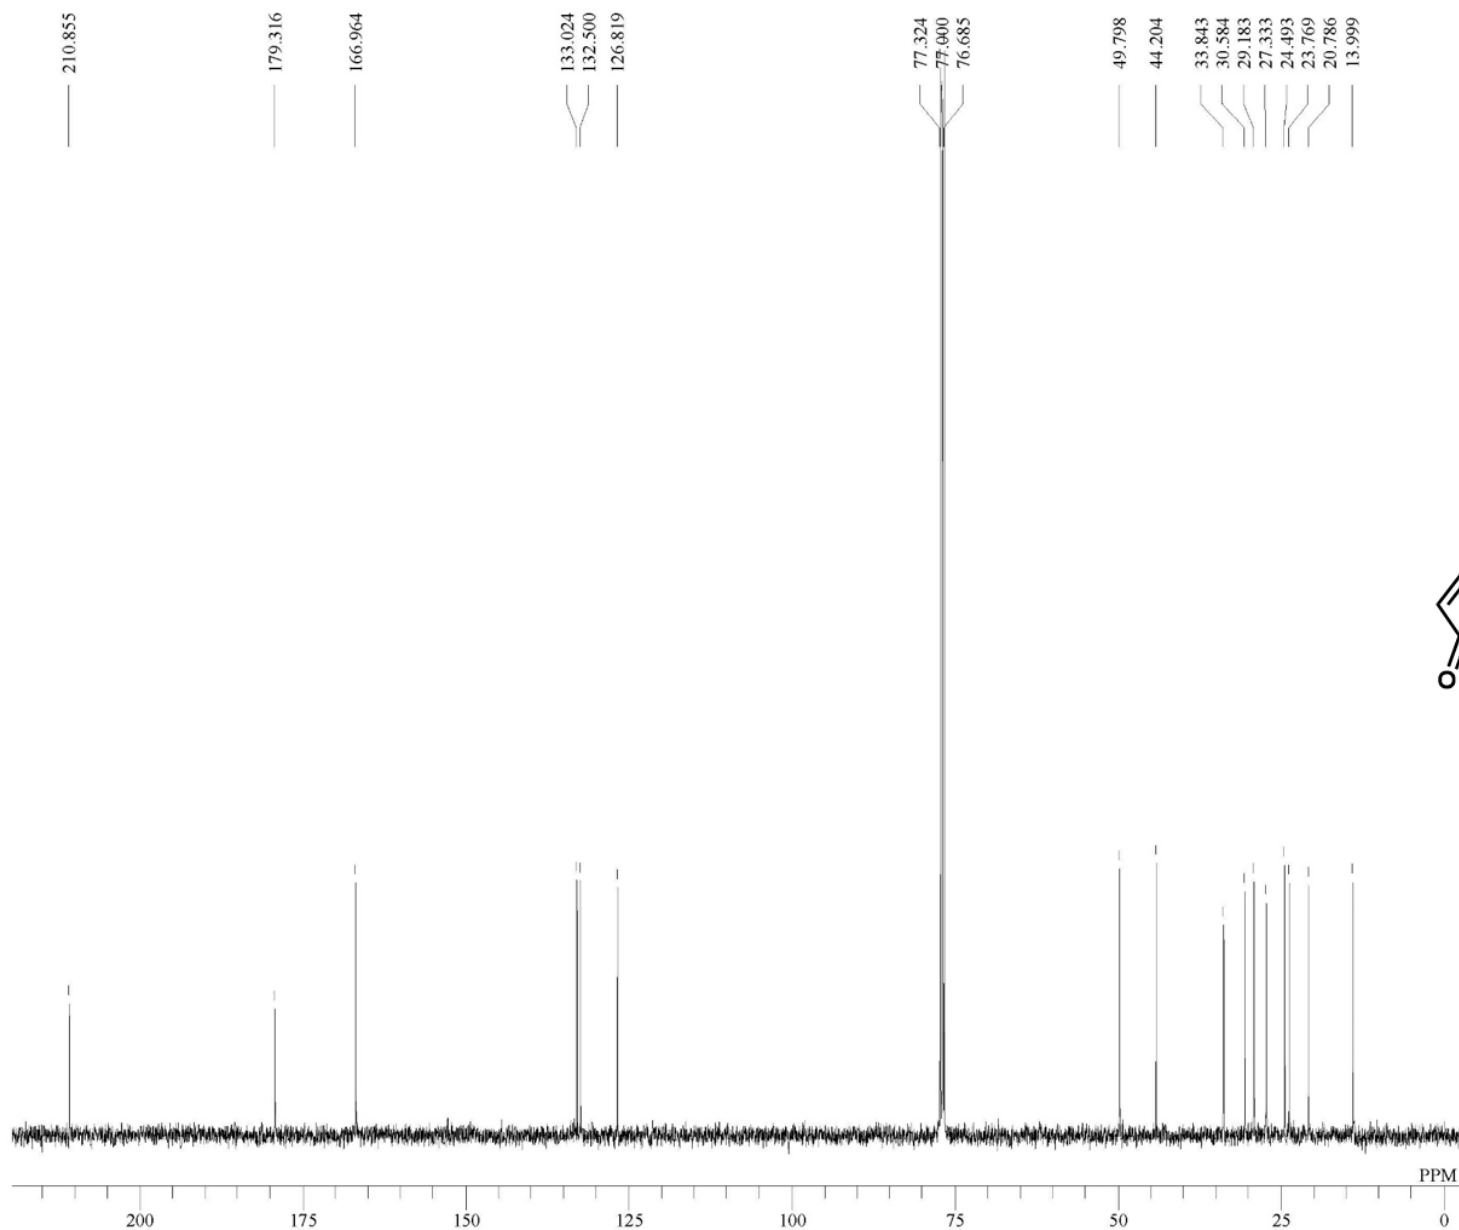

DFILE 13C\_04.jdf  
 COMNT single pulse decoupled gated N  
 DATIM 24-08-2020 18:58:19  
 OBNUC 13C  
 EXMOD carbon.jxp  
 OBFRQ 100.53 MHz  
 OBSET 5.35 KHz  
 OBFIN 5.86 Hz  
 POINT 32780  
 FREQU 31407.04 Hz  
 SCANS 337  
 ACQTM 0.0000 sec  
 PD 2.0000 sec  
 PW1 3.37 usec  
 IRNUC 1H  
 CTEMP 21.9 c  
 SLVNT CDCL3  
 EXREF 77.00 ppm  
 BF 0.25 Hz  
 RGAIN 50

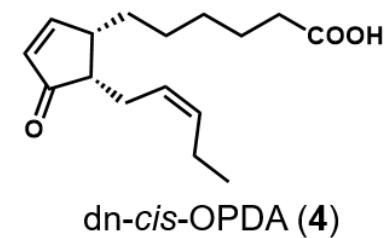



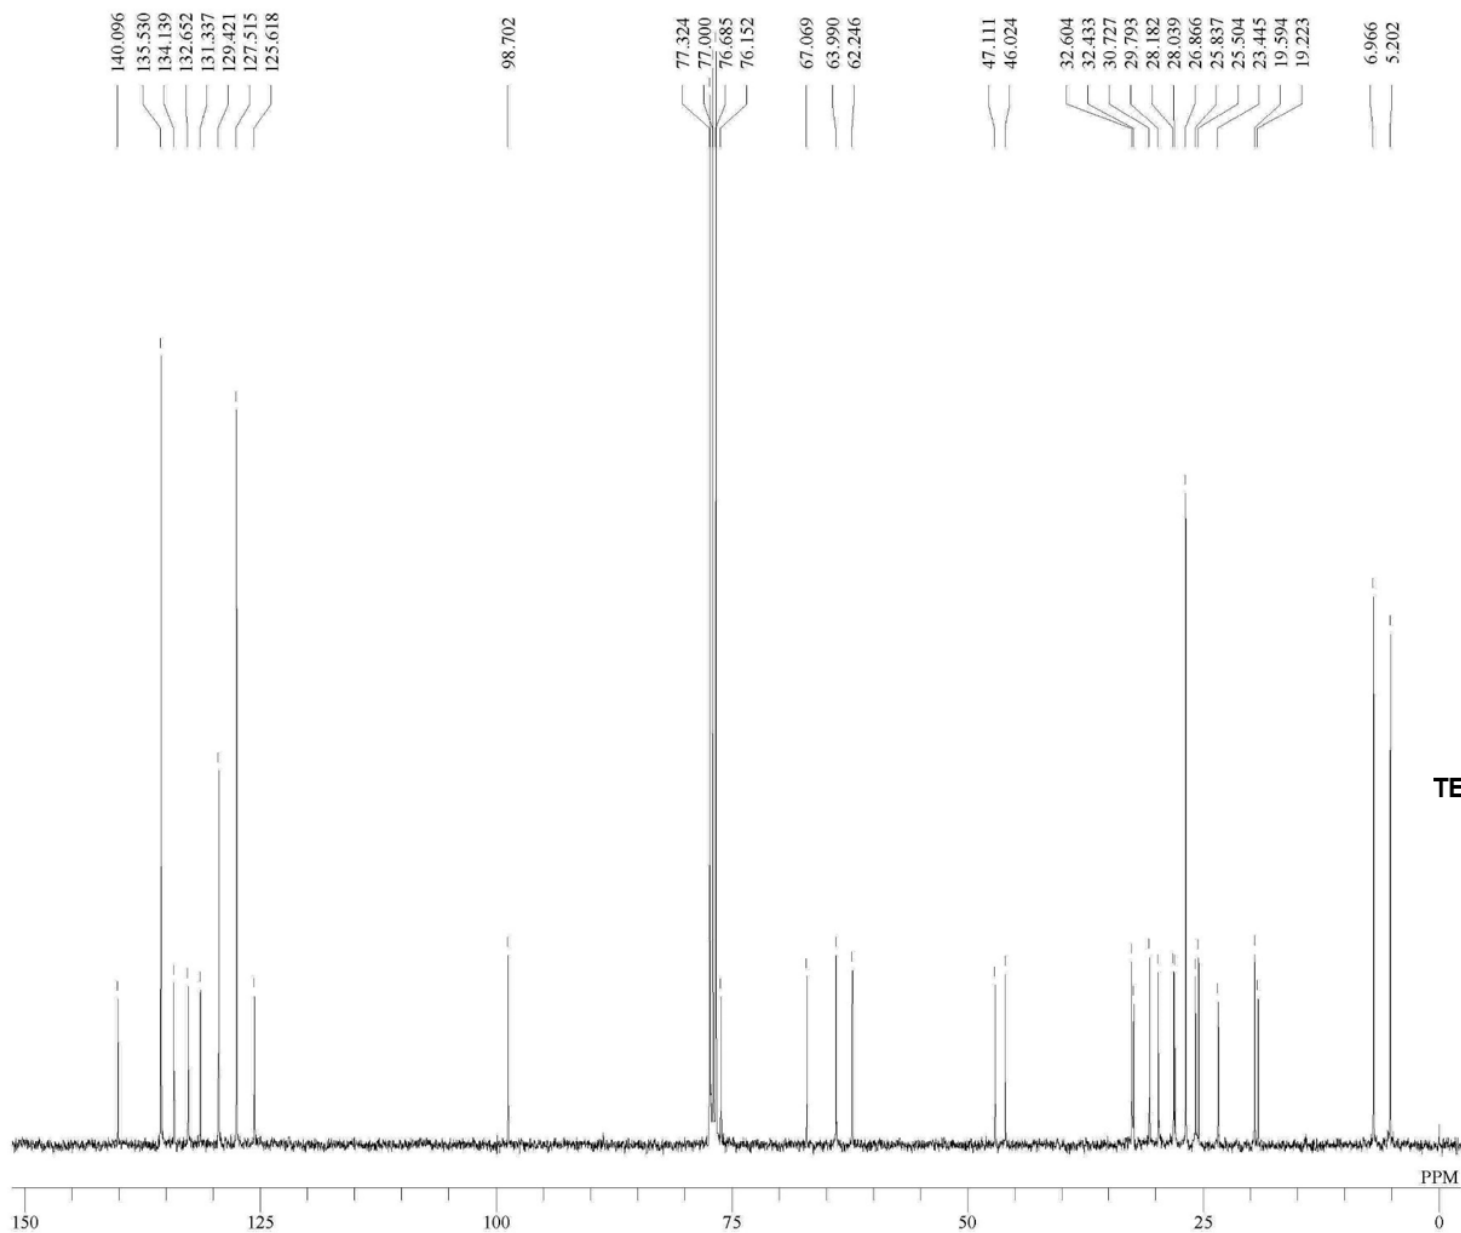

DFILE Wittig\_Carbon-1-1.jdf  
 COMNT single pulse decoupled gated N  
 DATIM 17-08-2020 11:11:59  
 OBNUC <sup>13</sup>C  
 EXMOD carbon.jxp  
 OBFRQ 100.53 MHz  
 OBSET 5.35 KHz  
 OBFIN 5.86 Hz  
 POINT 32780  
 FREQU 31407.04 Hz  
 SCANS 1024  
 ACQTM 1.0433 sec  
 PD 2.0000 sec  
 PW1 3.37 usec  
 IRNUC <sup>1</sup>H  
 CTEMP 21.9 c  
 SLVNT CDCL<sub>3</sub>  
 EXREF 77.00 ppm  
 BF 0.25 Hz  
 RGAIN 50

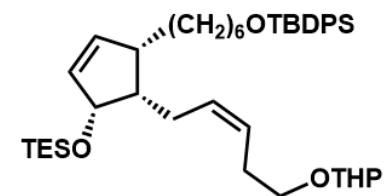

**21**

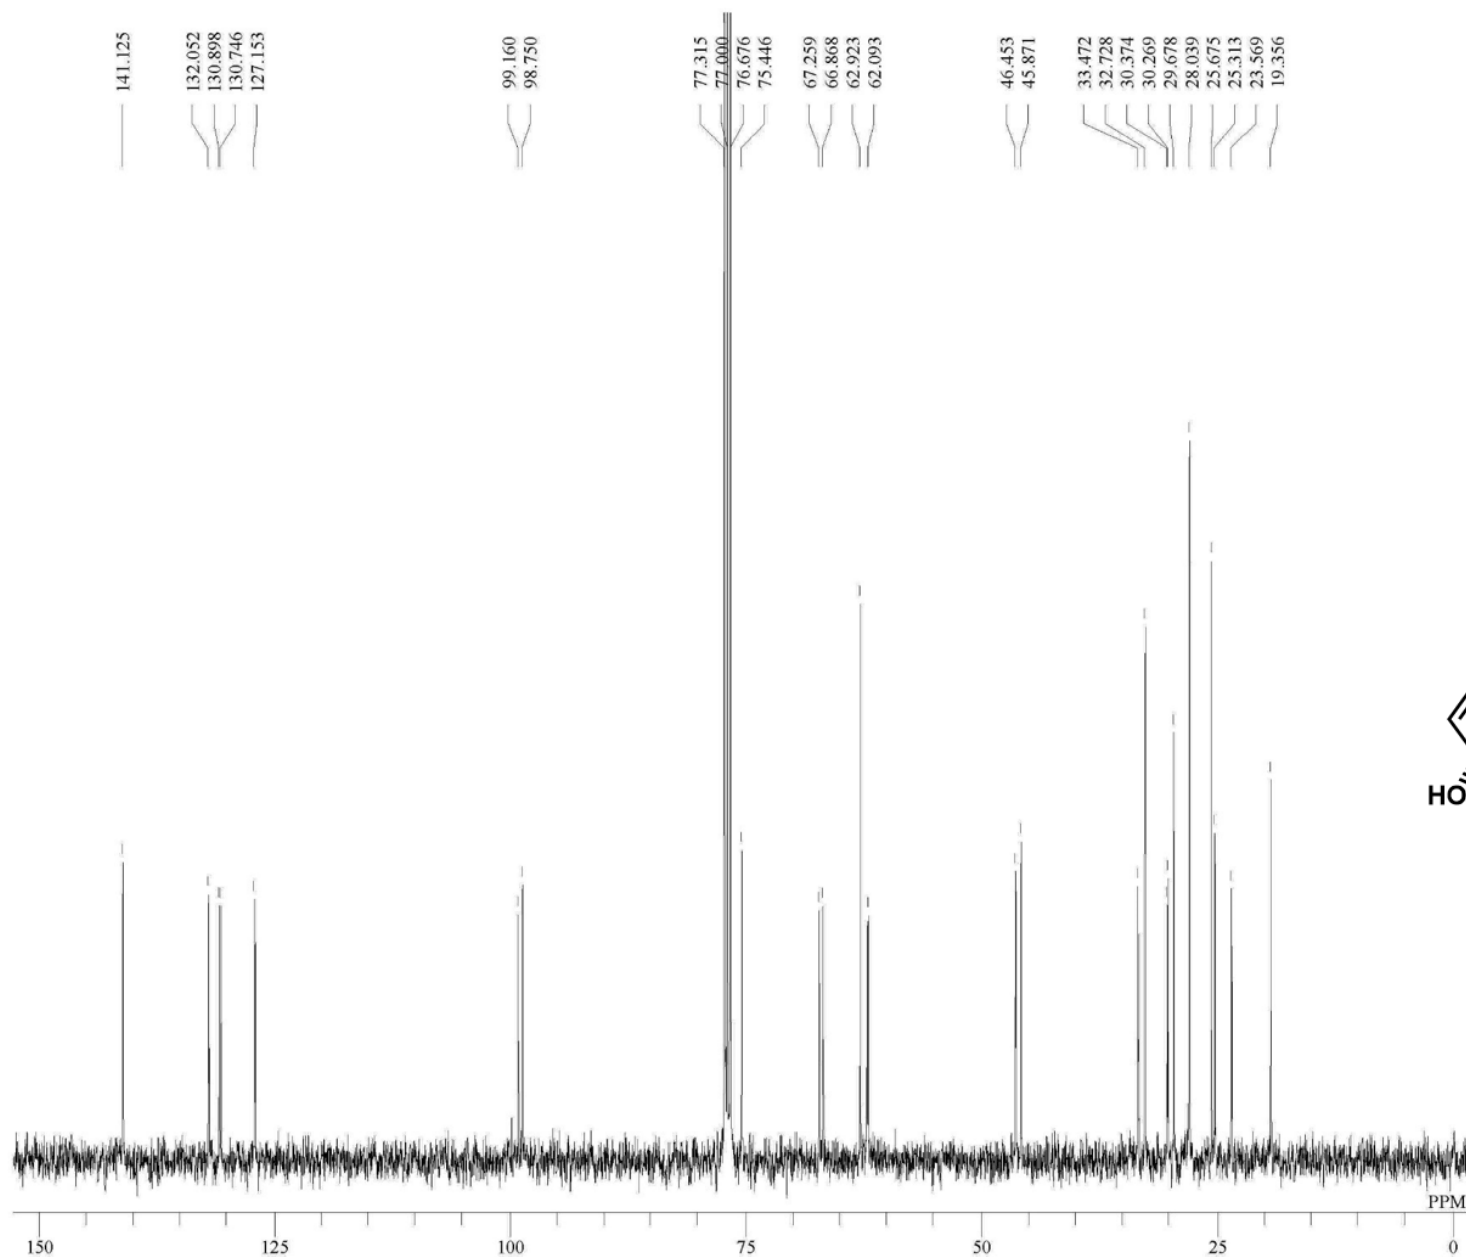

DFILE TBAF\_13C-1.jdf  
 COMNT single pulse decoupled gated N  
 DATIM 01-09-2020 11:29:24  
 OBNUC <sup>13</sup>C  
 EXMOD carbon.jxp  
 OBFRQ 100.53 MHz  
 OBSET 5.35 KHz  
 OBFIN 5.86 Hz  
 POINT 32780  
 FREQU 31407.04 Hz  
 SCANS 201  
 ACQTM 1.0433 sec  
 PD 2.0000 sec  
 PW1 3.37 usec  
 IRNUC <sup>1</sup>H  
 CTEMP 22.6 c  
 SLVNT CDCL<sub>3</sub>  
 EXREF 77.00 ppm  
 BF 0.25 Hz  
 RGAIN 50

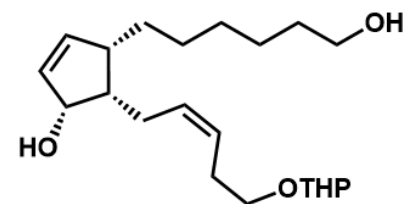

**22**

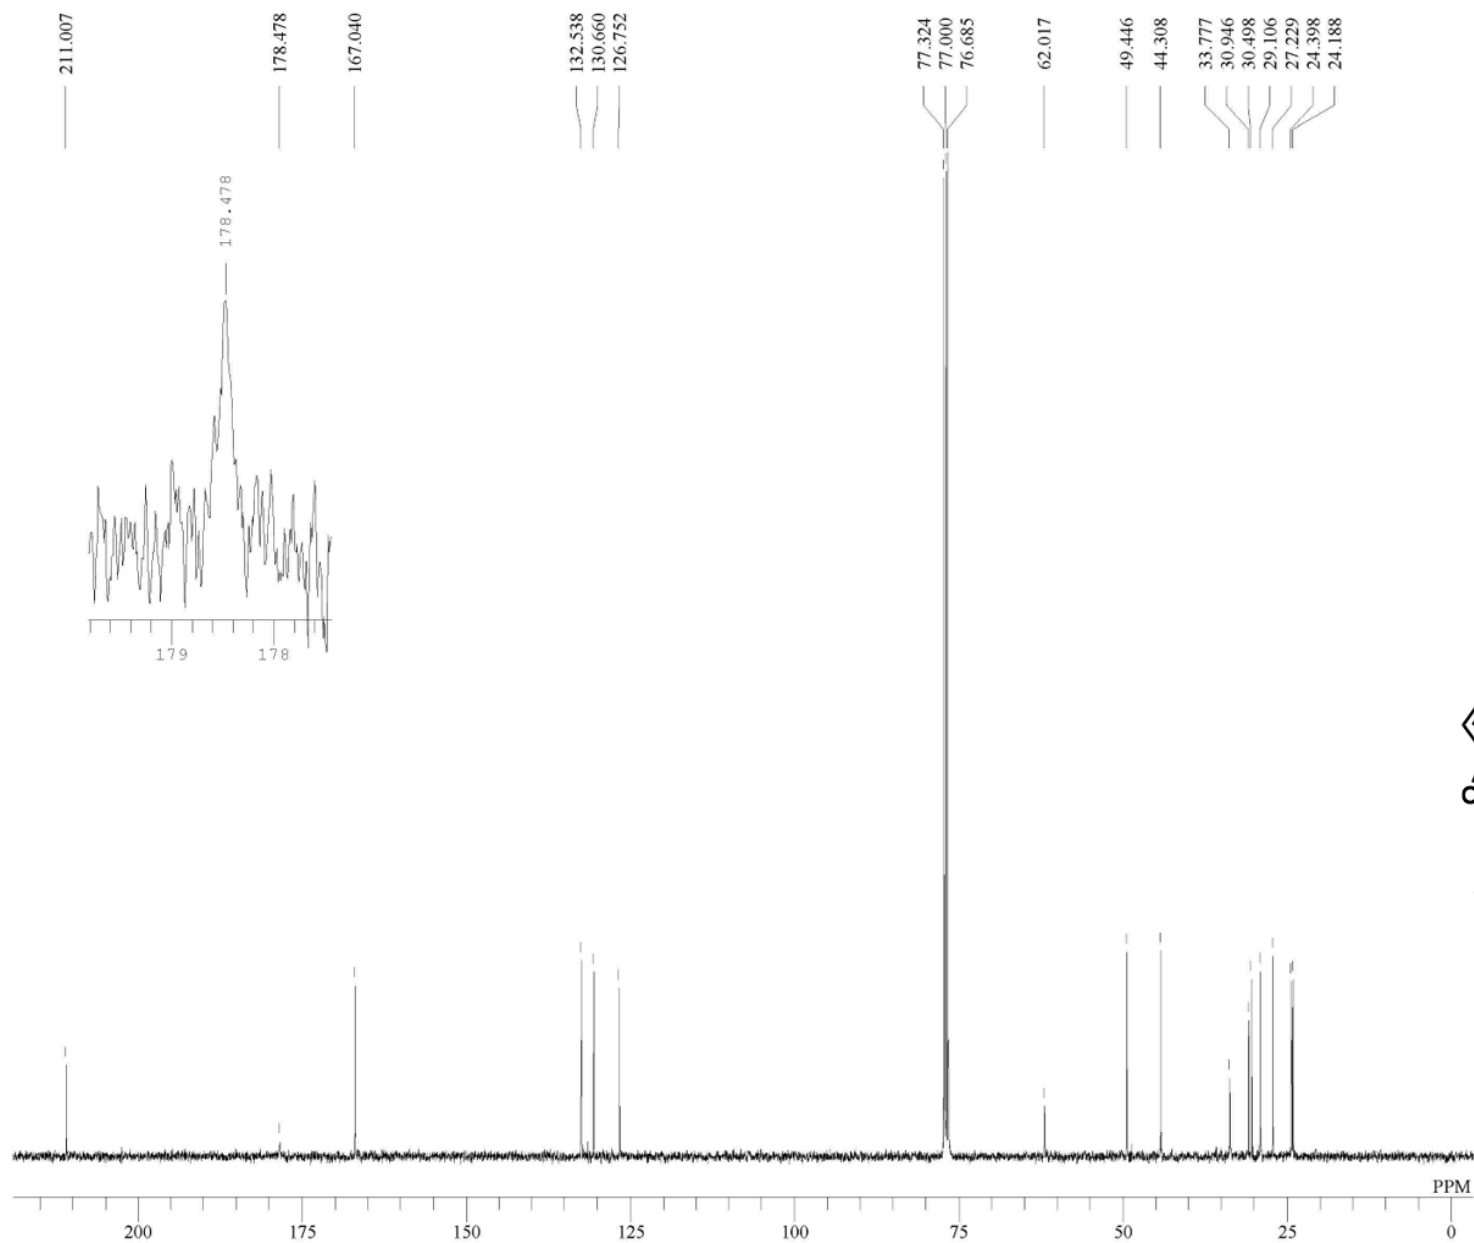

DFILE 16OHdn-cis-OPDA\_Carbon-1.jd  
 COMNT single pulse decoupled gated N  
 DATIM 02-12-2020 17:35:13  
 OBNUC <sup>13</sup>C  
 EXMOD carbon.jxp  
 OBFRQ 100.53 MHz  
 OBSET 5.35 KHz  
 OBFIN 5.86 Hz  
 POINT 32780  
 FREQU 31407.04 Hz  
 SCANS 1024  
 ACQTM 1.0433 sec  
 PD 2.0000 sec  
 PW1 3.37 usec  
 IRNUC <sup>1</sup>H  
 CTEMP 23.2 c  
 SLVNT CDCL<sub>3</sub>  
 EXREF 77.00 ppm  
 BF 0.25 Hz  
 RGAIN 50

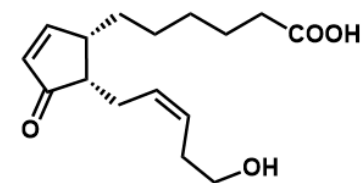

16OH-dn-*cis*-OPDA (**6**)

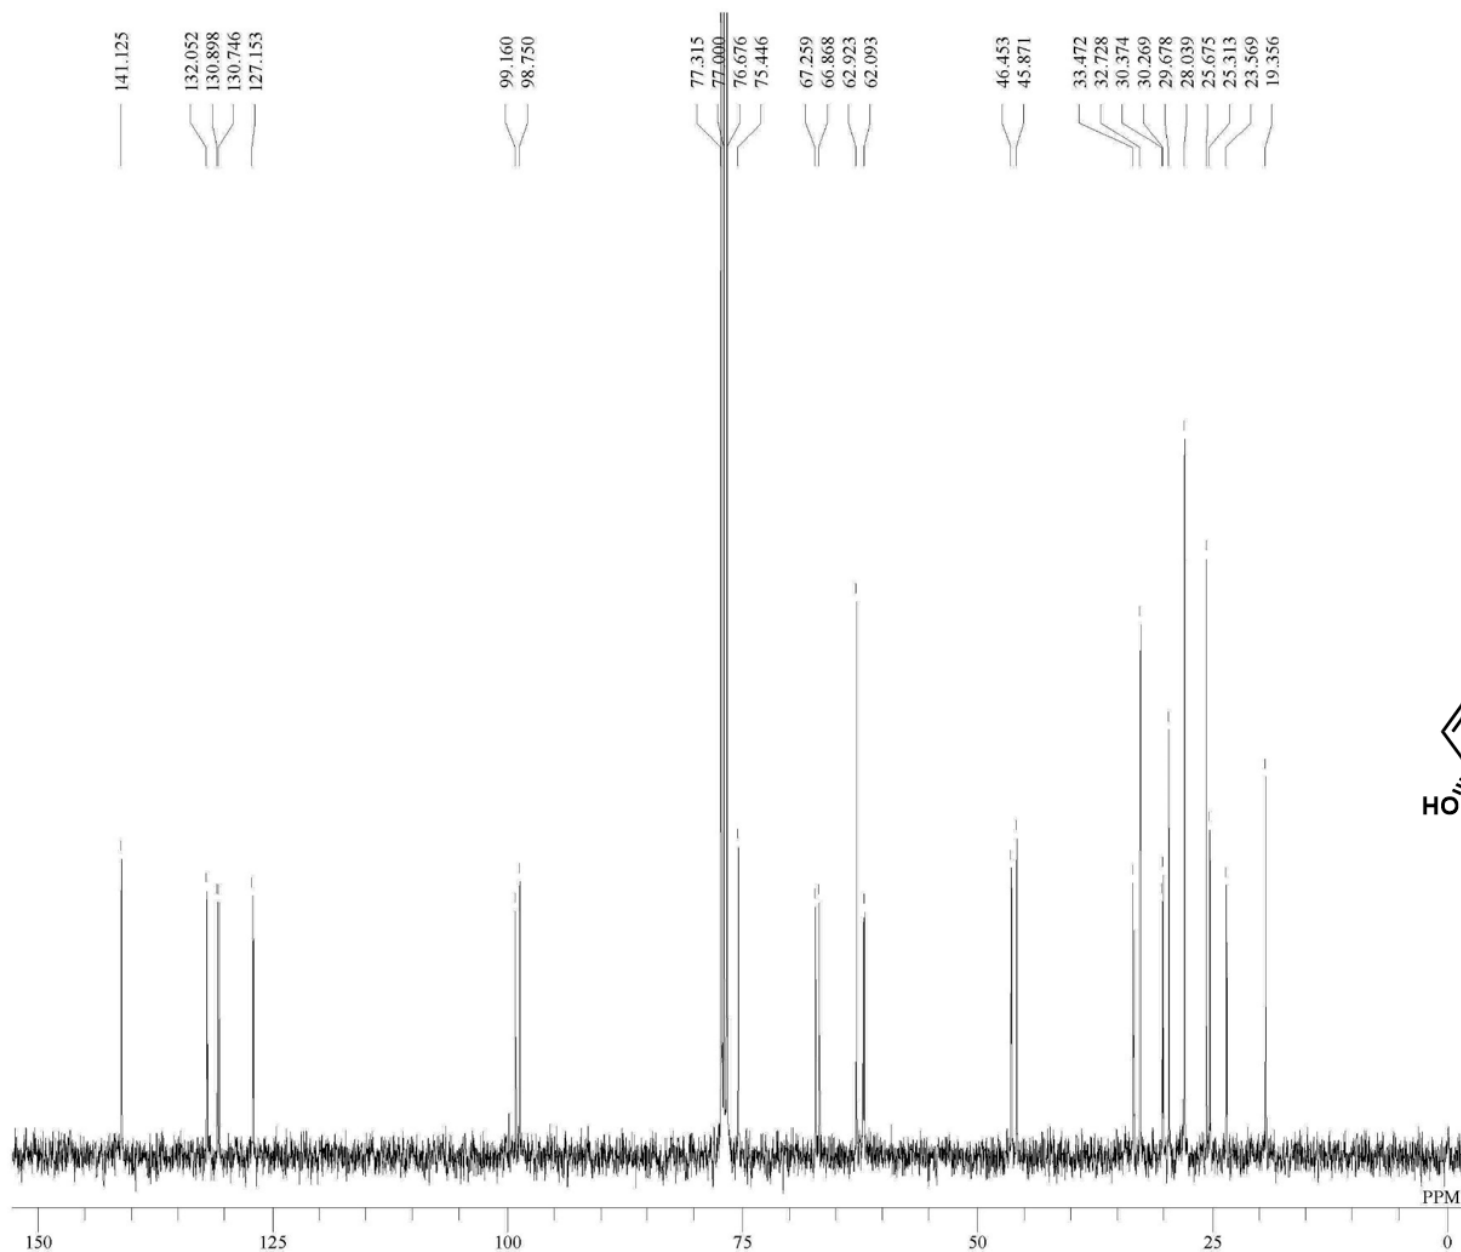

DFILE TBAF\_13C-1.jdf  
 COMNT single pulse decoupled gated N  
 DATIM 01-09-2020 11:29:24  
 OBNUC 13C  
 EXMOD carbon.jxp  
 OBFRQ 100.53 MHz  
 OBSET 5.35 KHz  
 OBFIN 5.86 Hz  
 POINT 32780  
 FREQU 31407.04 Hz  
 SCANS 201  
 ACQTM 1.0433 sec  
 PD 2.0000 sec  
 PW1 3.37 usec  
 IRNUC 1H  
 CTEMP 22.6 c  
 SLVNT CDCL3  
 EXREF 77.00 ppm  
 BF 0.25 Hz  
 RGAIN 50

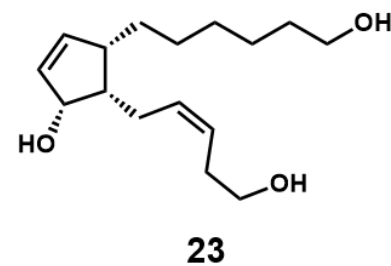

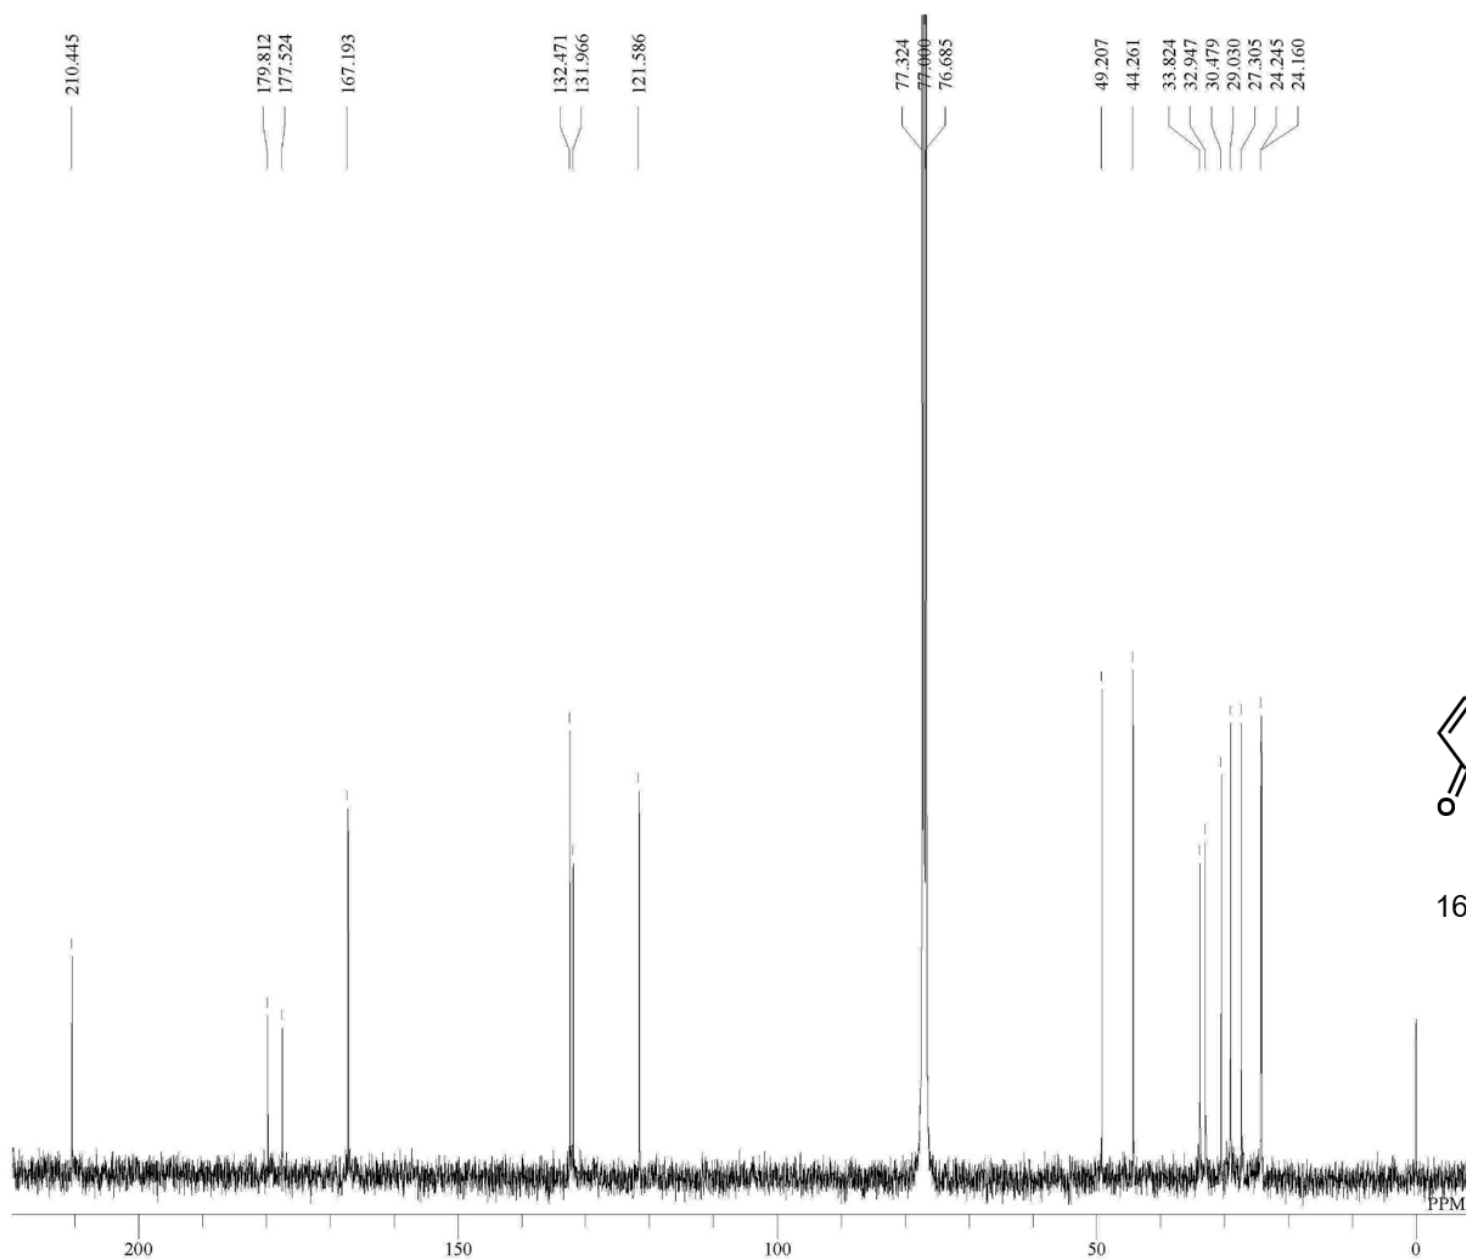

DFILE 07179\_13C-1.jdf  
 COMNT single pulse decoupled gated N  
 DATIM 18-11-2020 22:59:16  
 OBNUC 13C  
 EXMOD carbon.jxp  
 OBFRQ 100.53 MHz  
 OBSET 5.35 KHz  
 OBFIN 5.86 Hz  
 POINT 32780  
 FREQU 31407.04 Hz  
 SCANS 10000  
 ACQTM 1.0433 sec  
 PD 2.0000 sec  
 PW1 3.37 usec  
 IRNUC 1H  
 CTEMP 21.9 c  
 SLVNT CDCL3  
 EXREF 77.00 ppm  
 BF 0.25 Hz  
 RGAIN 50

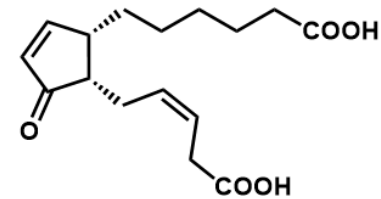

16-COOH-dn-*cis*-OPDA (7)

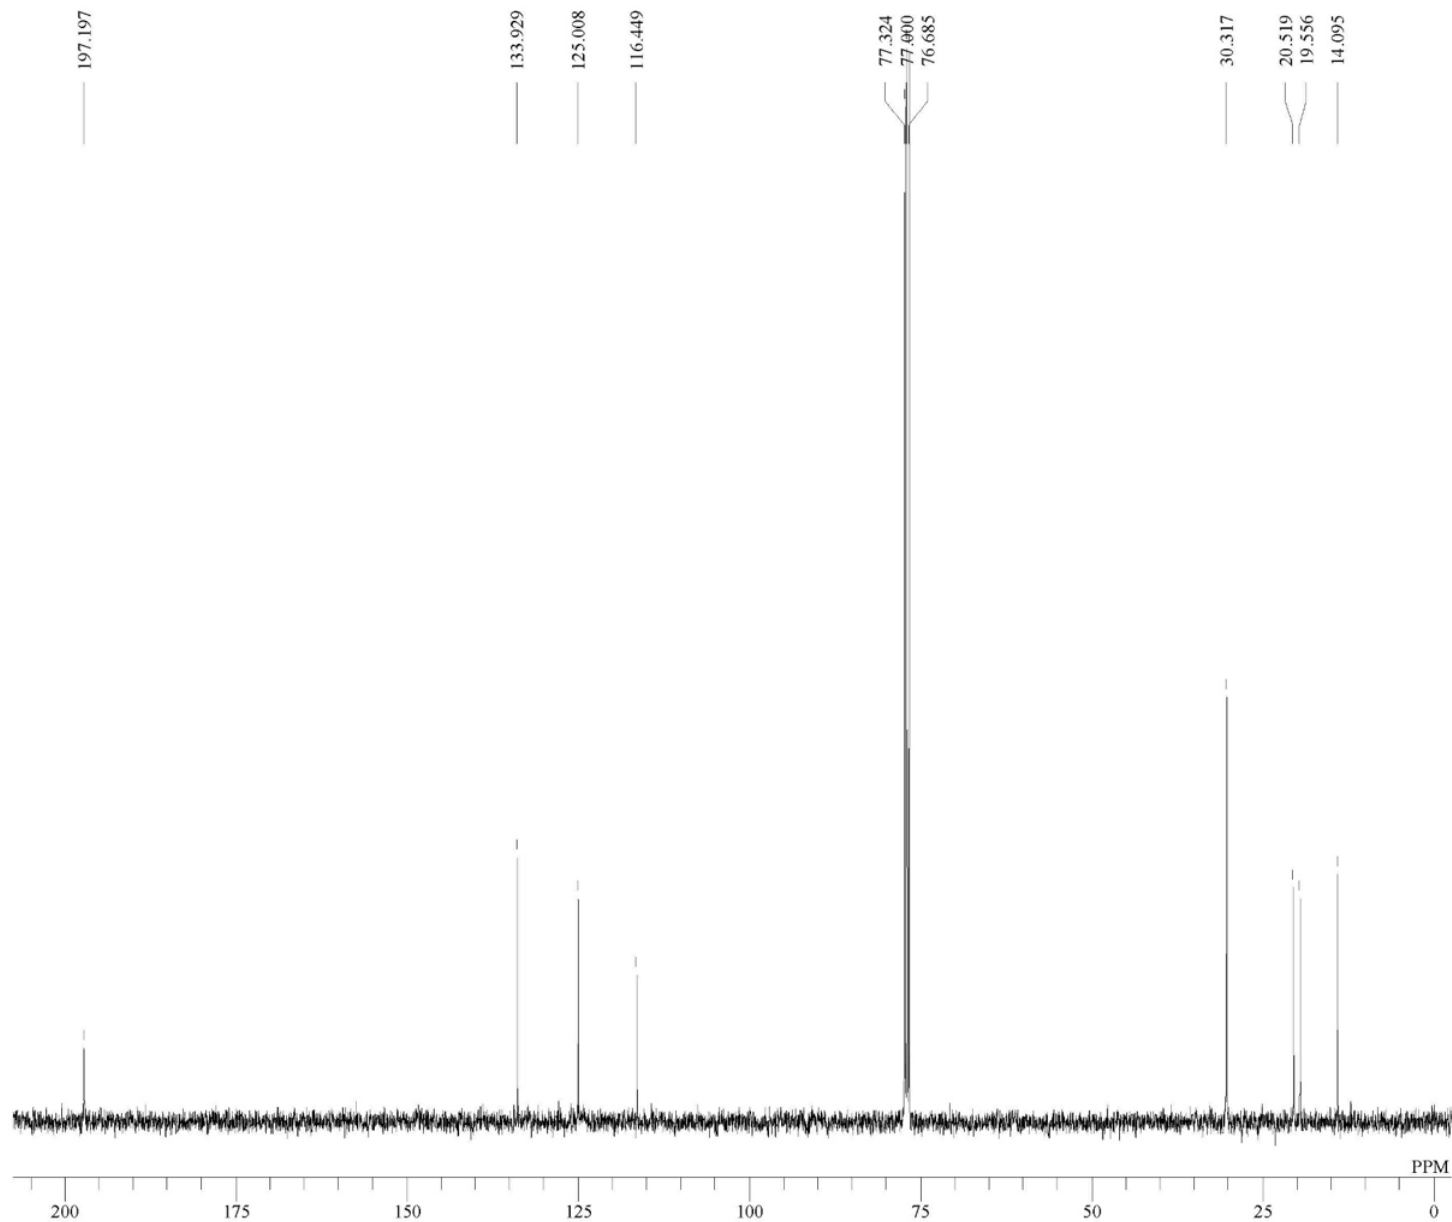

DFILE 27\_Carbon-1-1.jdf  
COMNT single pulse decoupled gated N  
DATIM 19-08-2020 19:38:27  
OBNUC 13C  
EXMOD carbon.jxp  
OBFRQ 100.53 MHz  
OBSET 5.35 KHz  
OBFIN 5.86 Hz  
POINT 32780  
FREQU 31407.04 Hz  
SCANS 208  
ACQTM 1.0433 sec  
PD 2.0000 sec  
PW1 3.37 usec  
IRNUC 1H  
CTEMP 21.6 c  
SLVNT CDCL3  
EXREF 77.00 ppm  
BF 0.25 Hz  
RGAIN 50

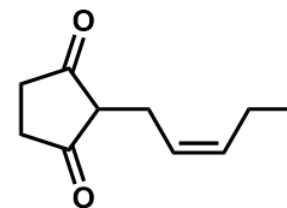

**27**

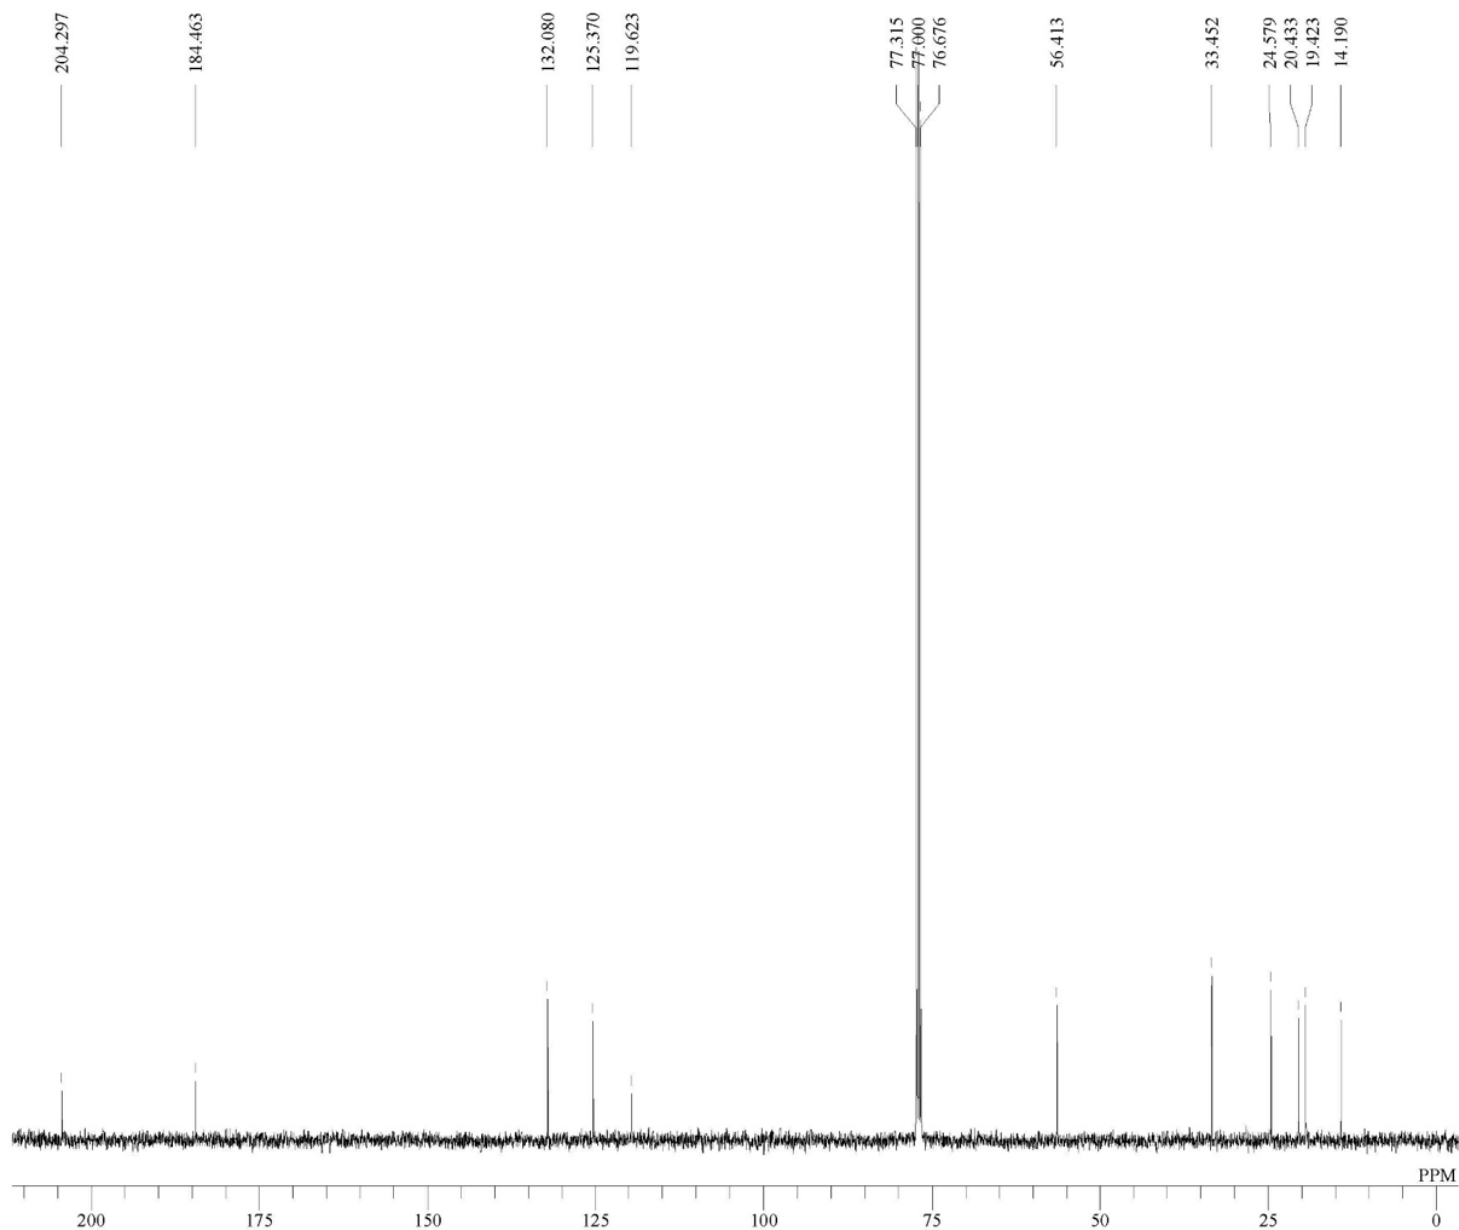

DFILE 28\_Carbon-2-1.jdf  
COMNT single pulse decoupled gated N  
DATIM 25-08-2020 12:04:35  
OBNUC 13C  
EXMOD carbon.jxp  
OBFRQ 100.53 MHz  
OBSET 5.35 KHz  
OBFIN 5.86 Hz  
POINT 32780  
FREQU 31407.04 Hz  
SCANS 520  
ACQTM 1.0433 sec  
PD 2.0000 sec  
PW1 3.37 usec  
IRNUC 1H  
CTEMP 21.7 c  
SLVNT CDCL3  
EXREF 77.00 ppm  
BF 0.25 Hz  
RGAIN 50

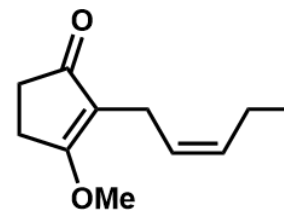

28

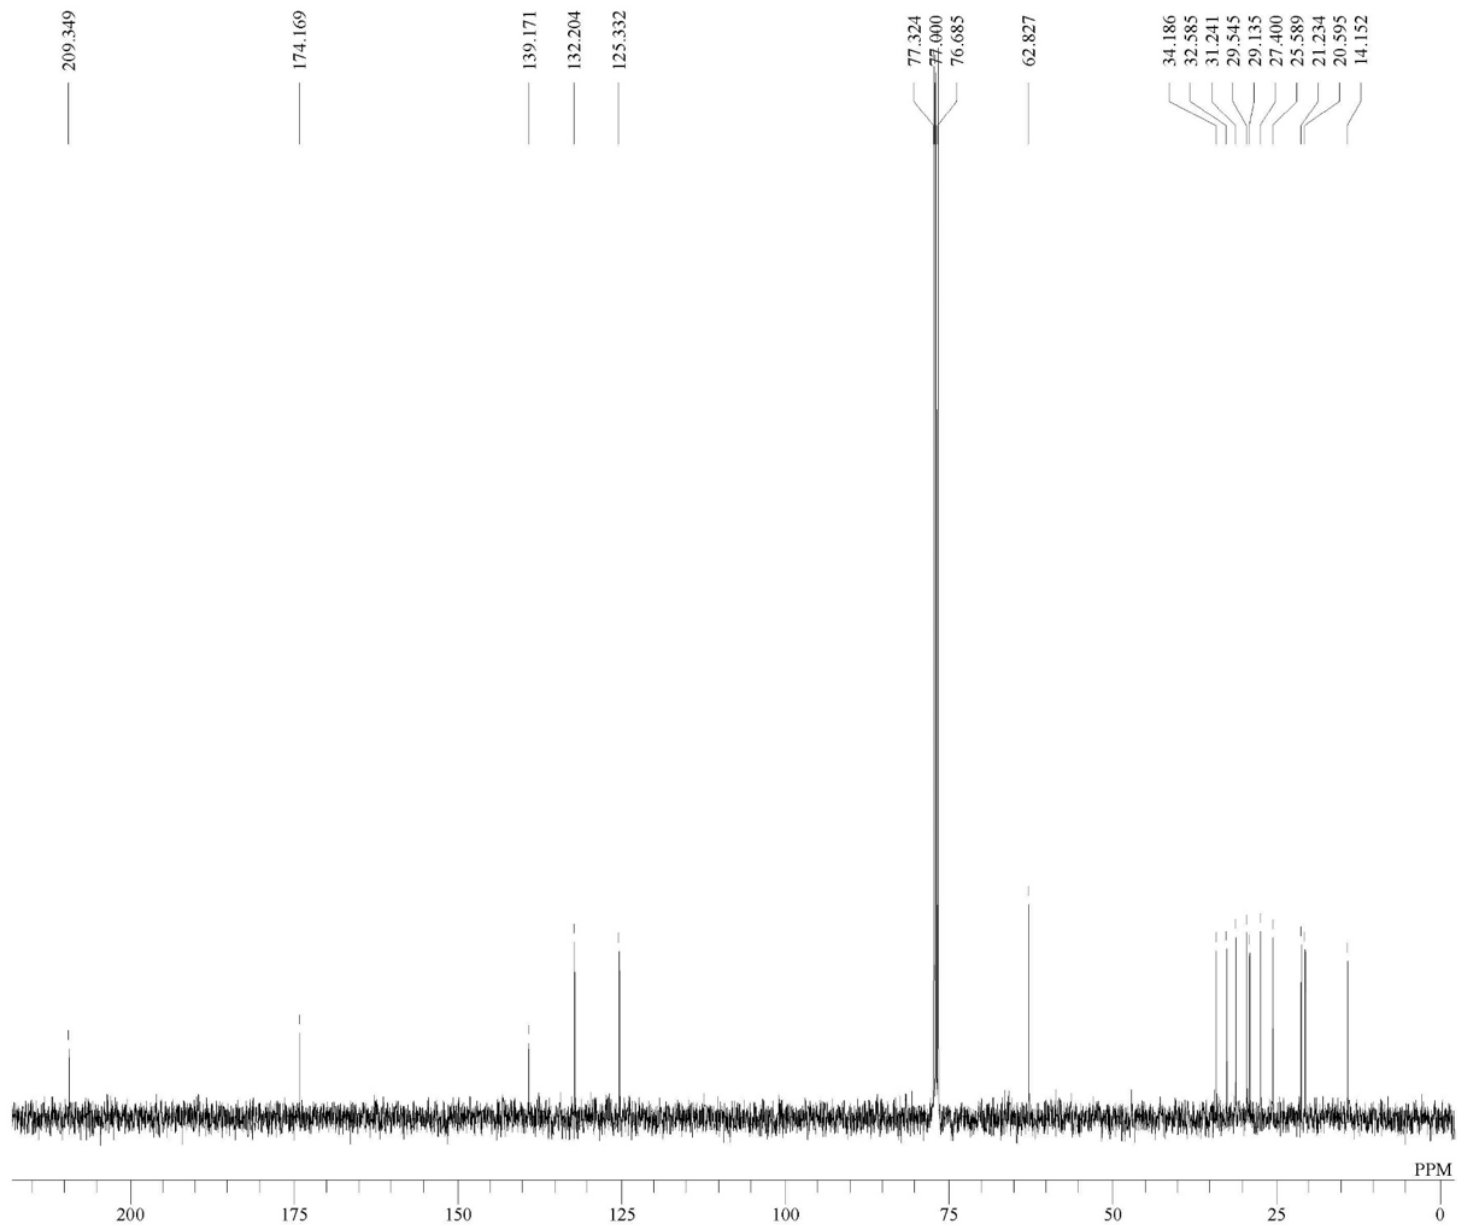

DFILE 30 target Carbon-1-1.jdf  
 COMNT single pulse decoupled gated N  
 DATIM 30-07-2020 17:29:56  
 OBNUC 13C  
 EXMOD carbon.jxp  
 OBFRQ 100.53 MHz  
 OBSET 5.35 KHz  
 OBFIN 5.86 Hz  
 POINT 32780  
 FREQU 31407.04 Hz  
 SCANS 99  
 ACQTM 1.0433 sec  
 PD 2.0000 sec  
 PW1 3.37 usec  
 IRNUC 1H  
 CTEMP 24.3 c  
 SLVNT CDCL3  
 EXREF 77.00 ppm  
 BF 0.25 Hz  
 RGAIN 50

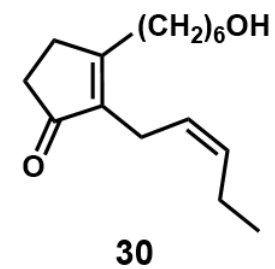



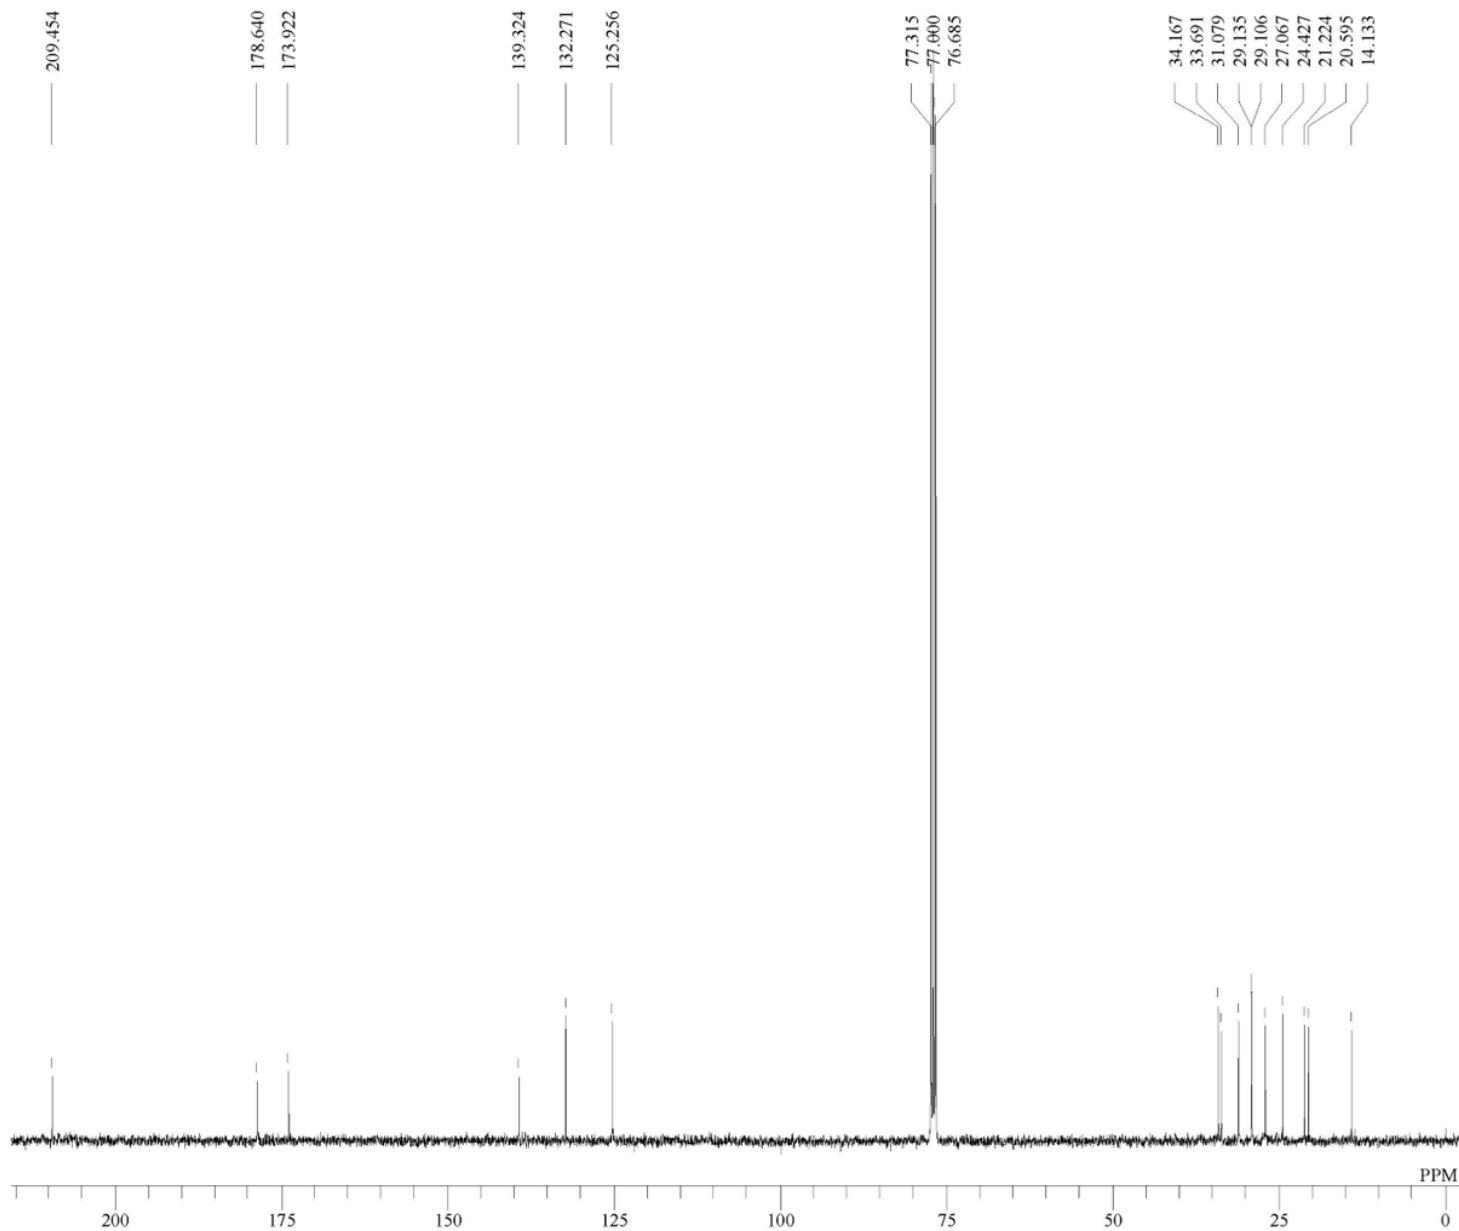

DFILE 5\_Carbon-1-1.jdf  
 COMNT single pulse decoupled gated N  
 DATIM 31-07-2020 18:50:42  
 OBNUC <sup>13</sup>C  
 EXMOD carbon.jxp  
 OBFRQ 100.53 MHz  
 OBSET 5.35 KHz  
 OBFIN 5.86 Hz  
 POINT 32780  
 FREQU 31407.04 Hz  
 SCANS 1032  
 ACQTM 1.0433 sec  
 PD 2.0000 sec  
 PW1 3.37 usec  
 IRNUC <sup>1</sup>H  
 CTEMP 24.3 c  
 SLVNT CDCL3  
 EXREF 77.00 ppm  
 BF 0.25 Hz  
 RGAIN 50

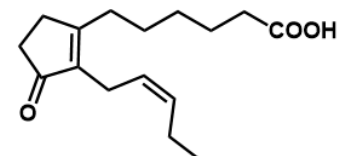

dn-iso-OPDA (**5**)

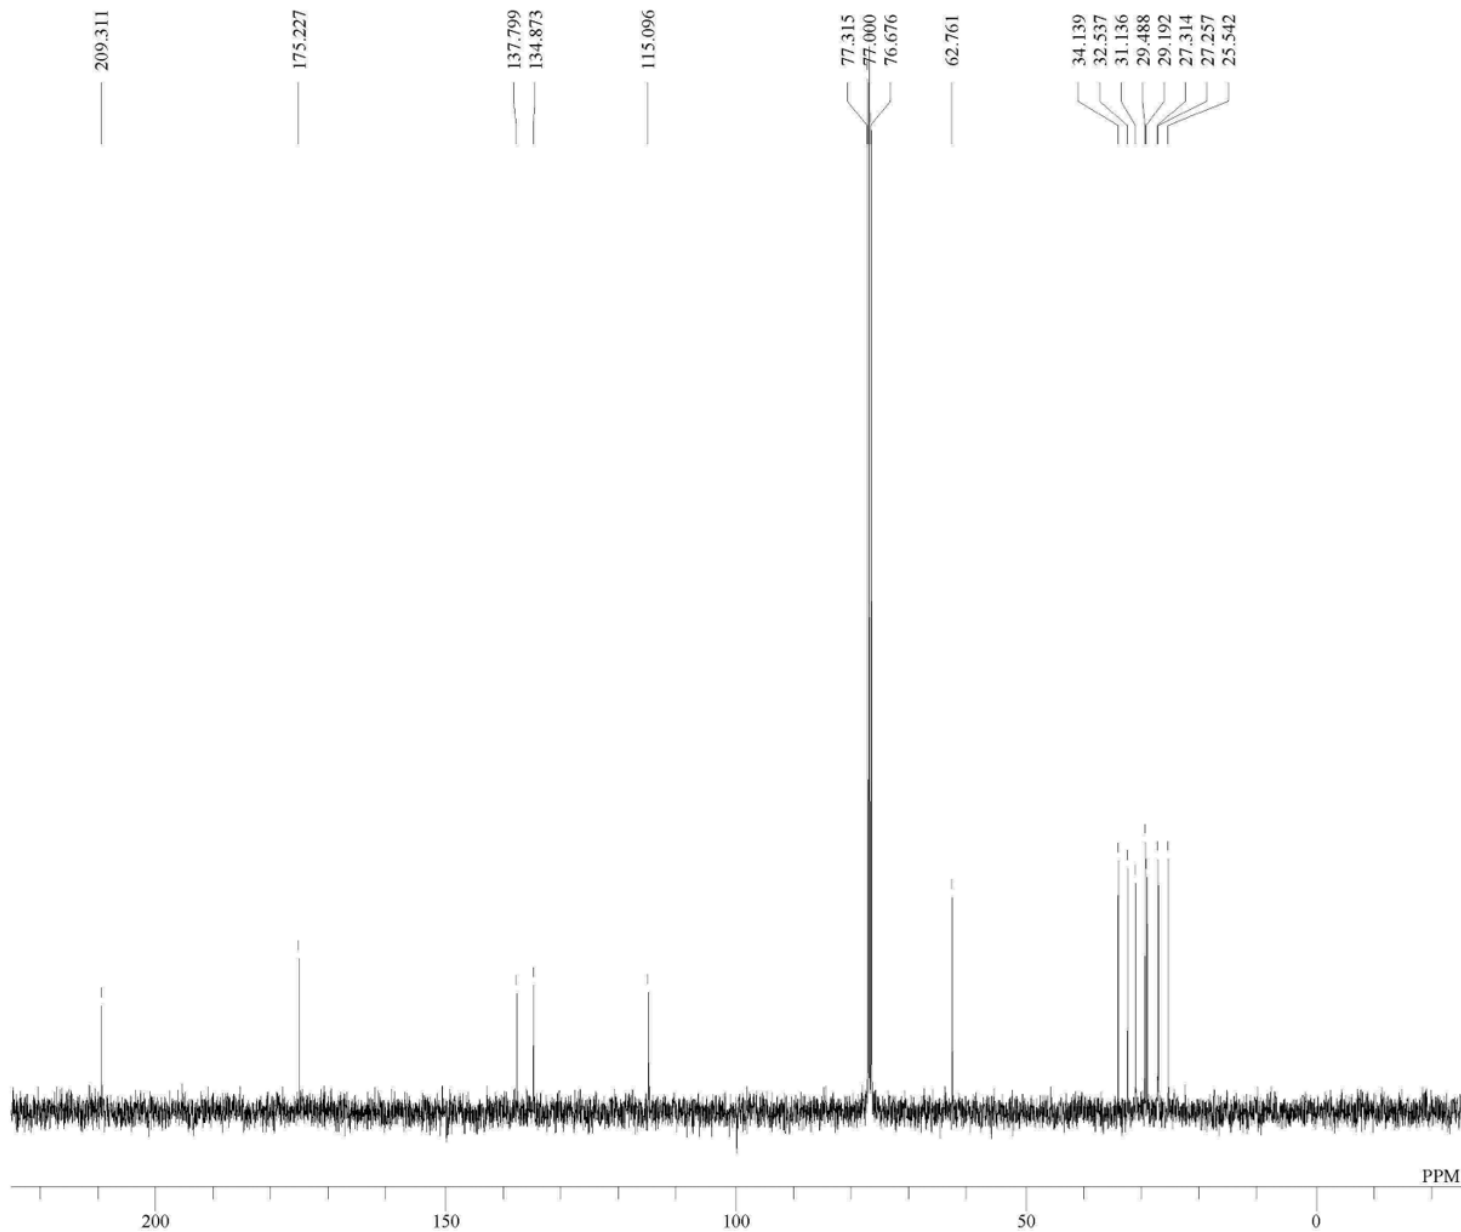

DFILE 33 fOfŠfjff [f\_Carbon-1-1.jd  
 COMNT single pulse decoupled gated N  
 DATIM 30-10-2020 20:59:35  
 OBNUC 13C  
 EXMOD carbon.jxp  
 OBFRQ 100.53 MHz  
 OBSET 5.35 KHz  
 OBFIN 5.86 Hz  
 POINT 32780  
 FREQU 31407.04 Hz  
 SCANS 74  
 ACQTM 1.0433 sec  
 PD 2.0000 sec  
 PW1 3.37 usec  
 IRNUC 1H  
 CTEMP 22.0 c  
 SLVNT CDCL3  
 EXREF 77.00 ppm  
 BF 0.25 Hz  
 RGAIN 50

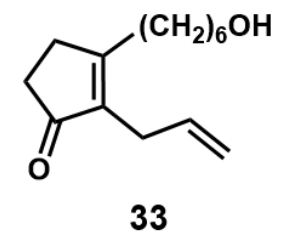

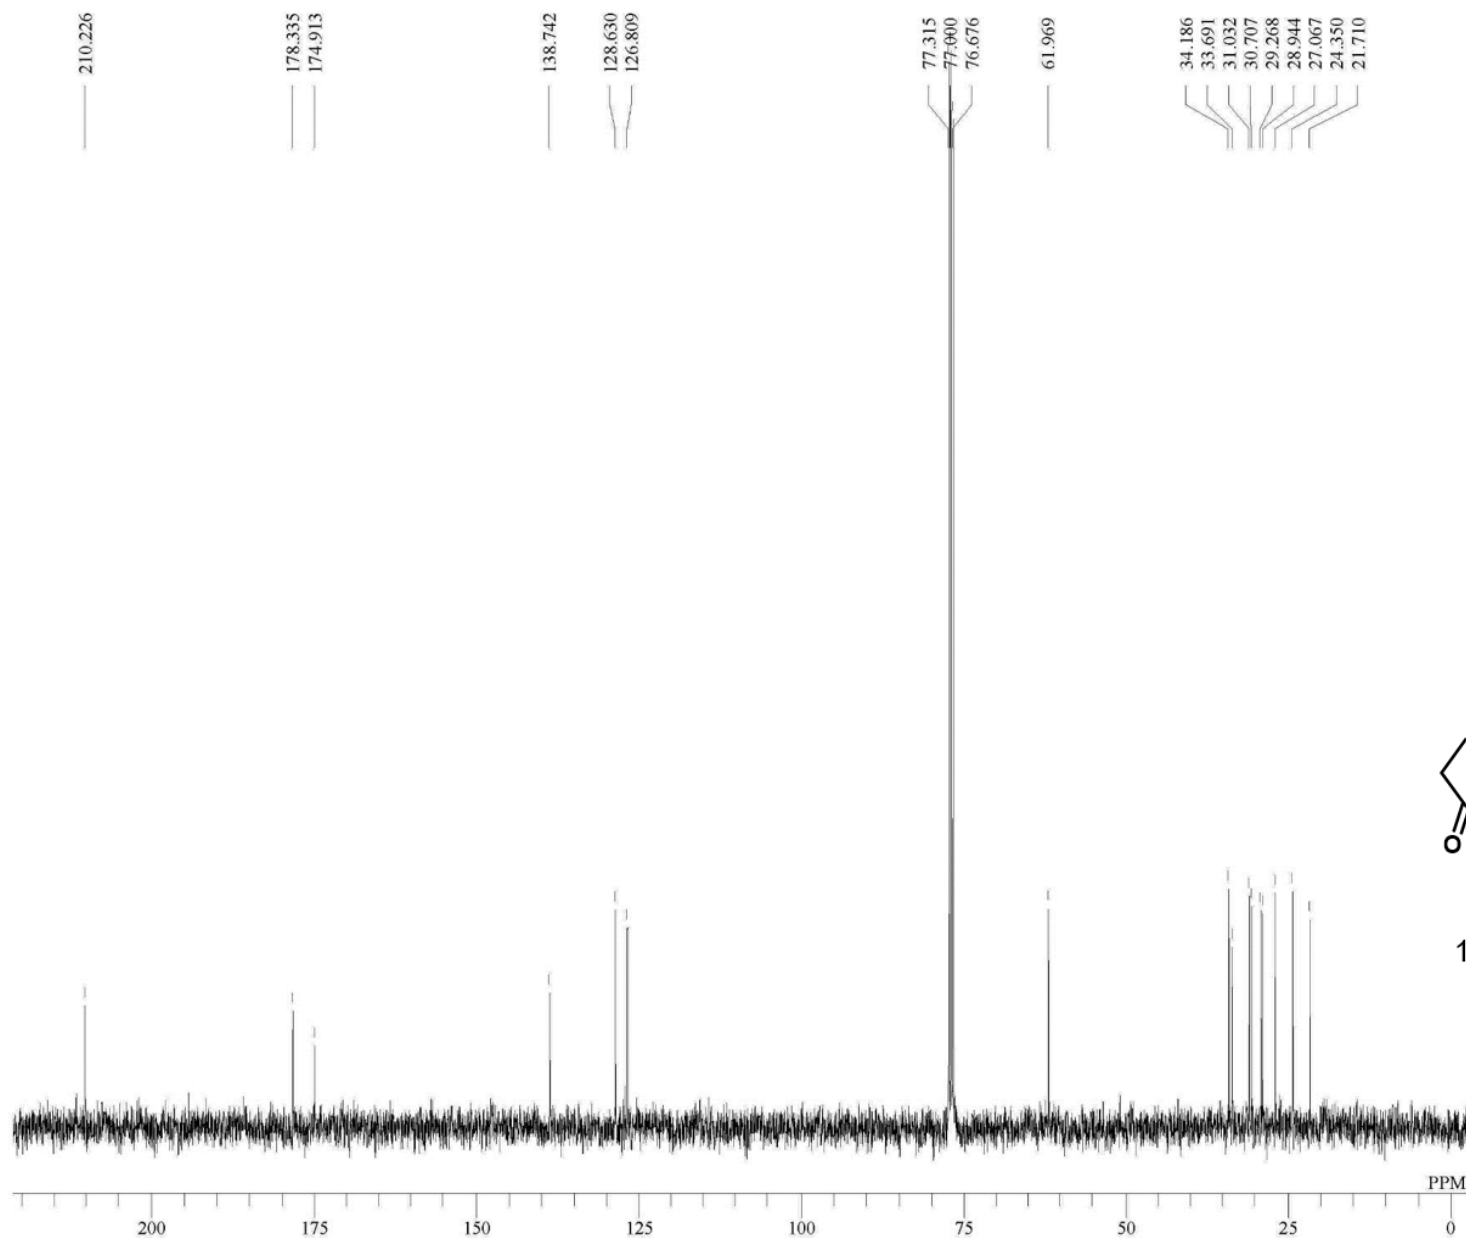

DFILE 07195\_Carbon\_64-1.jdf  
 COMNT single pulse decoupled gated N  
 DATIM 12-12-2020 22:42:08  
 OBNUC <sup>13</sup>C  
 EXMOD carbon.jxp  
 OBFRQ 100.53 MHz  
 OBSET 5.35 KHz  
 OBFIN 5.86 Hz  
 POINT 32780  
 FREQU 31407.04 Hz  
 SCANS 65  
 ACQTM 0.0000 sec  
 PD 2.0000 sec  
 PW1 3.37 usec  
 IRNUC <sup>1</sup>H  
 CTEMP 20.5 c  
 SLVNT CDCL3  
 EXREF 77.00 ppm  
 BF 0.25 Hz  
 RGAIN 50

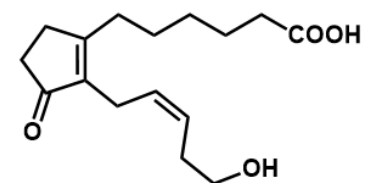

16-OH-dn-iso-OPDA (8)

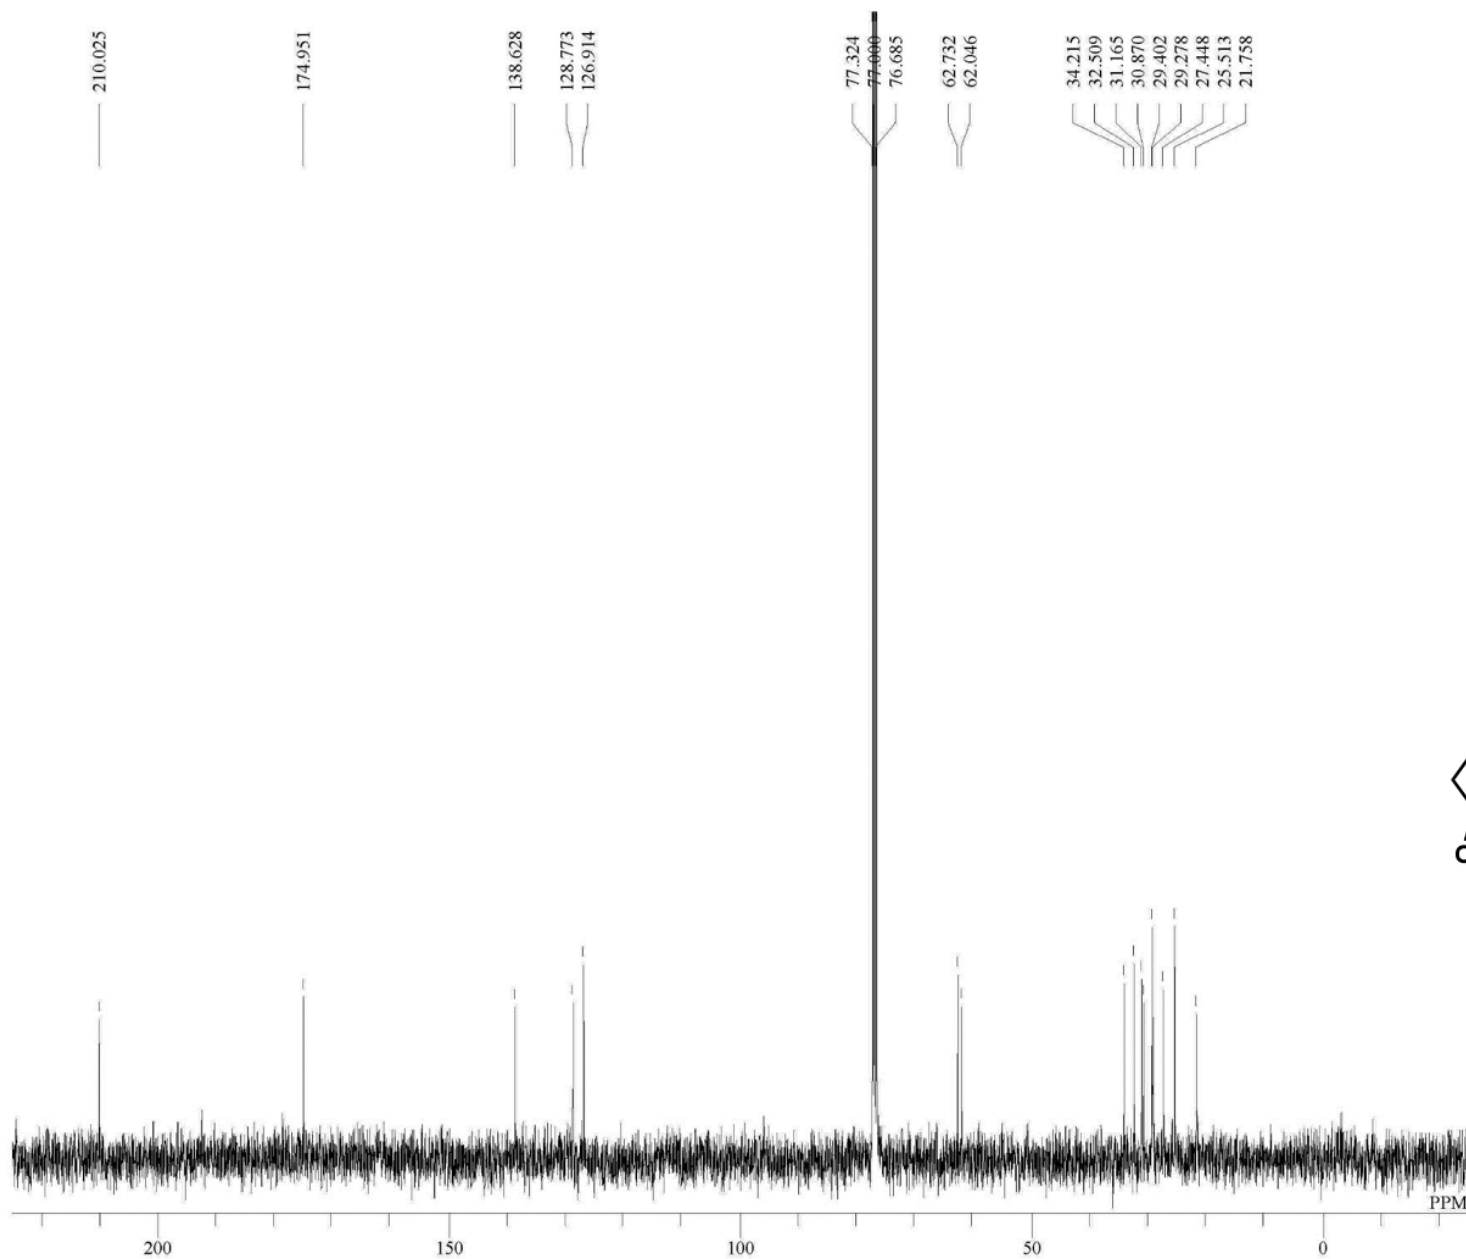

DFILE 35 fWfq/hf fL.fV\_Carbon-1-1  
 COMNT single pulse decoupled gated N  
 DATIM 30-10-2020 20:43:38  
 OBNUC <sup>13</sup>C  
 EXMOD carbon.jxp  
 OBFRQ 100.53 MHz  
 OBSET 5.35 KHz  
 OBFIN 5.86 Hz  
 POINT 32780  
 FREQU 31407.04 Hz  
 SCANS 174  
 ACQTM 1.0433 sec  
 PD 2.0000 sec  
 PW1 3.37 usec  
 IRNUC <sup>1</sup>H  
 CTEMP 22.0 c  
 SLVNT CDCL<sub>3</sub>  
 EXREF 77.00 ppm  
 BF 0.25 Hz  
 RGAIN 50

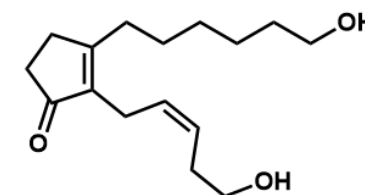

**34**

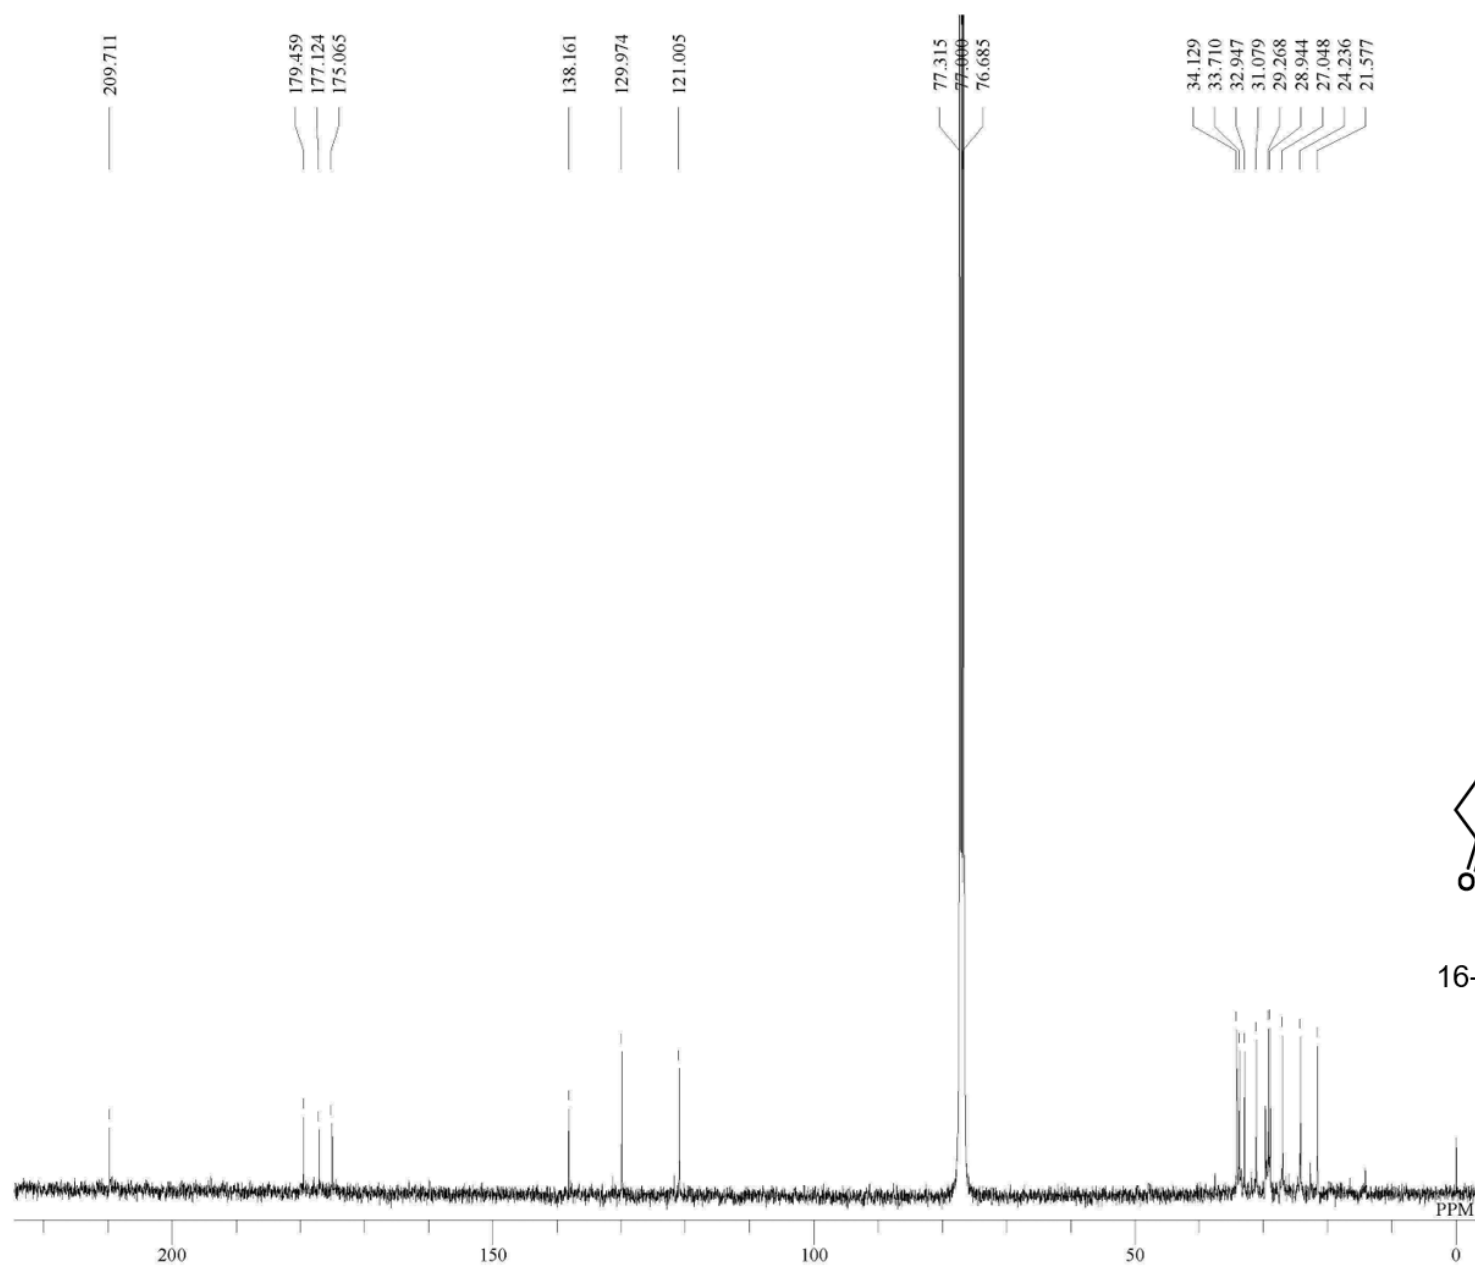

DFILE 07197\_Carbon-1-1.jdf  
 COMNT single pulse decoupled gated N  
 DATIM 13-12-2020 18:01:10  
 OBNUC <sup>13</sup>C  
 EXMOD carbon.jxp  
 OBFRQ 100.53 MHz  
 OBSET 5.35 KHz  
 OBFIN 5.86 Hz  
 POINT 32780  
 FREQU 31407.04 Hz  
 SCANS 15000  
 ACQTM 1.0433 sec  
 PD 2.0000 sec  
 PW1 3.37 usec  
 IRNUC <sup>1</sup>H  
 CTEMP 19.2 c  
 SLVNT CDCL3  
 EXREF 77.00 ppm  
 BF 0.25 Hz  
 RGAIN 50

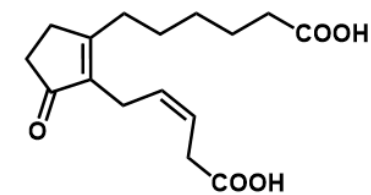

16-COOH-dn-iso-OPDA (9)
